# Supplementary material
Source: publisher figshare collection journal article supplement (https://future-science-group.figshare.com/articles/dataset/_/17091443)
Supplement: Supplementary file 1 [file 1]

## Sheet: Small RNAs
	Row.names	names	14_S4:2009R2 (BPA)	8_S7:2027R2 (BPA)	5_S8:2021R3 (BPA)	30_S1:3017L4 (BPA)	28_S2:3008R2 (Control)	25_S3:3008R3 (Control)	12_S5:2029R4 (Control)	10_S6:2005L5 (Control)	baseMean	lfcSE	stat	log2FoldChange	Fold Chage	pvalue	padj	BPA vs Control Gene regulation
906	efu-miR-152-3p	miR-152-3p	1126.22	1090.99	0	0.83282	0	0	0	0	277.255	2.23192	-11.6697	-26.0459	1.44341e-08	1.82e-31	5.23e-28	down
1264	mmu-miR-151-3p	miR-151-3p	0	0	0	0	43227.6	36705	0	0	9991.58	2.57091	11.669	30	1073741824	1.84e-31	5.23e-28	up
2583	rno-miR-540-3p	miR-540-3p	11411.6	0	0	7188.07	0	0	0	0	2324.96	2.48966	-11.6304	-28.9557	1.92077e-09	2.89e-31	5.49e-28	down
8208	rno-miR-322-1-5p	miR-322-1-5p	92299.3	0	0	119985	0	0	0	0	26535.6	2.61845	-11.4572	-30	9.31323e-10	2.16e-30	3.08e-27	down
779	chi-miR-148a-3p	miR-148a-3p	0	0	0	0	0	0	78539	62679.8	17652.4	2.62865	11.4127	30	1073741824	3.61e-30	3.9e-27	up
716	cgr-miR-381-3p	miR-381-3p	0	0	0	0	0	18193.7	15485.4	0	4209.88	2.53343	11.4016	28.8852	4.95821e+08	4.1e-30	3.9e-27	up
1043	ggo-mir-423	mir-423	0	3908.25	0	3631.1	0	0	0	0	942.419	2.4329	-11.3797	-27.6857	4.63207e-09	5.28e-30	4.3e-27	down
2538	rno-miR-144-5p	miR-144-5p	0	2743.71	0	4270.7	0	0	0	0	876.801	2.43003	-11.3669	-27.622	4.84111e-09	6.11e-30	4.35e-27	down
147	aca-miR-30e-5p	miR-30e-5p	0	57114.4	52022.7	0	0	0	0	0	13642.1	2.59889	-11.2526	-29.2442	1.57264e-09	2.25e-29	1.42e-26	down
4176	cgr-miR-125a-5p	miR-125a-5p	0	0	0	0	6644.91	0	5675.84	0	1540.09	2.48591	10.9741	27.2807	1.63042e+08	5.09e-28	2.9e-25	up
31050	piR-hsa-5937	piR-piR-hsa-5937	0	0	0	0	2357.11	2325.55	0	0	585.332	2.41065	10.8287	26.1041	7.21304e+07	2.52e-27	1.3e-24	up
22402	oha-miR-191-5p	miR-191-5p	0	0	0	0	2884.66	0	0	2328.66	651.665	2.44142	10.7645	26.2807	8.15226e+07	5.06e-27	2.4e-24	up
472	bta-miR-542-5p	miR-542-5p	0	0	0	0	2455.1	0	2197.34	0	581.555	2.42935	10.7526	26.1217	7.30164e+07	5.76e-27	2.53e-24	up
674	cgr-miR-210-5p	miR-210-5p	786.247	0	447.685	0	0	0	0	0	154.242	2.34927	-10.7425	-25.2371	2.52866e-08	6.43e-27	2.62e-24	down
7269	oan-miR-98-5p	miR-98-5p	0	423.211	490.012	0	0	0	0	0	114.153	2.32495	-10.6798	-24.8301	3.35275e-08	1.27e-26	4.81e-24	down
997	ggo-miR-183-3p	miR-183-3p	0	0	0	0	1714.34	2176.64	0	0	486.372	2.39984	10.6418	25.5386	4.87387e+07	1.9e-26	6.78e-24	up
688	cgr-miR-29a-3p	miR-29a-3p	0	0	0	0	4721.28	0	0	6324.5	1380.72	2.48503	10.6009	26.3436	8.51559e+07	2.95e-26	9.89e-24	up
712	cgr-miR-369-3p	miR-369-3p	0	0	0	0	1543.45	0	0	1172.68	339.516	2.40295	10.5233	25.2869	4.09372e+07	6.75e-26	2.14e-23	up
217	aja-miR-142-3p	miR-142-3p	0	0	0	0	0	0	1069.97	1477.09	318.382	2.40936	10.492	25.2789	4.07105e+07	9.41e-26	2.82e-23	up
13940	bta-miR-99b-5p	miR-99b-5p	0	0	0	0	0	924.867	0	838.728	220.449	2.36659	10.4643	24.7647	2.8505e+07	1.26e-25	3.59e-23	up
4035	cfa-miR-149-5p	miR-149-5p	0	0	0	0	0	439.166	283.738	0	90.363	2.30709	10.196	23.5232	1.20558e+07	2.07e-24	5.6e-22	up
5185	gga-let-7b-5p	let-7b-5p	0	0	0	0	382.531	218.129	0	0	75.0825	2.28515	10.1339	23.1574	9.35553e+06	3.91e-24	1.01e-21	up
673	cgr-miR-210-3p	miR-210-3p	0	0	0	0	4336.4	5007.66	2837.38	0	1522.68	2.08101	6.68102	13.9033	15321.6	2.37e-11	5.88e-09	up
2575	rno-miR-434-1-5p	miR-434-1-5p	16910.1	0	13925.5	0	0.783876	0	1.08297	0	3854.68	2.33463	-6.01034	-14.0319	5.96992e-05	1.85e-09	4.4e-07	down
2732	xtr-miR-222-3p	miR-222-3p	343.128	364.936	428.15	0	0	0	0	0	142.027	2.00139	-5.37459	-10.7567	0.00057799	7.68e-08	1.75e-05	down
87	aca-miR-181a-1-3p	miR-181a-1-3p	358.916	401.238	320.705	0	0	0	0	0	135.107	1.9994	-5.34394	-10.6847	0.000607555	9.09e-08	1.99e-05	down
24870	sha-miR-21-3p	miR-21-3p	0	0	0	0.83282	1860.14	0	0	1847	463.496	2.32902	5.12584	11.9382	3924.22	2.96e-07	6.25e-05	up
4233	chi-miR-495-3p	miR-495-3p	210.508	205.396	0	130.753	0	0	0	0	68.3321	1.9437	-4.99149	-9.70198	0.00120064	5.99e-07	0.000121928	down
8199	rno-miR-146b-5p	miR-146b-5p	1.05254	483.397	6.51179	528.008	1.56775	0.581677	0	0	127.64	1.82372	-4.80343	-8.7601	0.00230647	1.56e-06	0.000306459	down
23693	ppt-MIR319e	miR319e	1.05254	3.82132	1.62795	0	1.56775	393.214	2.16594	1171.39	196.855	1.742	4.54687	7.92065	242.3	5.44e-06	0.00103419	up
98	aca-miR-193-3p	miR-193-3p	2256.64	0	275.123	0	0	1.74503	0	0	316.689	2.31472	-4.4657	-10.3369	0.000773203	7.98e-06	0.00146688	down
701	cgr-miR-32-5p	miR-32-5p	256.82	264.626	0	0	0	0	0	0	65.1807	2.27472	-4.23504	-9.63355	0.00125896	2.29e-05	0.00406885	down
815	cte-miR-9-5p	miR-9-5p	1.05254	0	0	0	0	86.0882	97.4671	73.2121	32.2275	1.88263	4.04407	7.6135	195.836	5.25e-05	0.00886539	up
864	eca-miR-194-1-5p	miR-194-1-5p	5.2627	9.5533	0	4.1641	10.1904	14.5419	543.65	629.367	152.091	1.47386	4.04243	5.95799	62.1634	5.29e-05	0.00886539	up
3955	ccr-miR-222-3p	miR-222-3p	0	0	0	0	0.783876	30.8289	32.489	47.5236	13.9532	1.81374	3.93174	7.13117	140.183	8.43e-05	0.0132179	up
4916	efu-let-7d	let-7d	159.986	134.701	0	0	0	0	0	0	36.8359	2.24125	-3.93104	-8.81046	0.00222734	8.46e-05	0.0132179	down
1545	mmu-miR-412-5p	miR-412-5p	0	0	185.586	119.926	0	0	0	0	38.189	2.25613	-3.92751	-8.86099	0.00215069	8.58e-05	0.0132179	down
2706	tni-miR-205-5p	miR-205-5p	4192.26	43.9452	37.4428	3363.76	52.5197	62.2395	57.3973	38.5327	981.013	1.37401	-3.76955	-5.1794	0.0275959	0.000163541	0.024076	down
1101	hsa-miR-412-3p	miR-412-3p	0	0	0	0	33.7066	31.4106	53.0654	0	14.7728	1.91554	3.76765	7.21708	148.785	0.000164788	0.024076	up
31036	piR-hsa-31238	piR-piR-hsa-31238	0	83.1137	0	121.592	0	0	0	0	25.5882	2.21387	-3.74279	-8.28605	0.00320369	0.000181988	0.0259241	down
4195	cgr-miR-379-5p	miR-379-5p	2.10508	0	0	0.83282	0	1.16335	262.078	114.314	47.5616	1.93037	3.59852	6.94647	123.338	0.000320039	0.0444776	up
616	cfa-miR-708-3p	miR-708-3p	110.517	0	58.6061	0	0	0	0	0	21.1403	2.23812	-3.57783	-8.00759	0.00388575	0.000346465	0.0470038	down
786	chi-miR-532-3p	miR-532-3p	96.8336	57.3198	0	0	0	0	0	0	19.2692	2.21166	-3.56117	-7.8761	0.00425654	0.000369208	0.0489244	down
15637	dan-mir-124	mir-124	0	0	0	0	18.0291	0	30.3231	43.6704	11.5028	1.96301	3.48979	6.85049	115.399	0.000483404	0.0626008
2557	rno-miR-341-5p	miR-341-5p	0	0	0	0	83.8747	0	67.144	0	18.8773	2.23196	3.39147	7.56963	189.97	0.000695182	0.0880255
16925	efu-miR-9298-5p	miR-9298-5p	86.3082	78.337	0	1.66564	0.783876	1.16335	0	0	21.0323	1.84296	-3.37933	-6.22798	0.013341	0.00072662	0.0900061
816	dan-miR-10-5p	miR-10-5p	0	77.3817	0	71.6225	0.783876	0	0	0	18.7235	2.10712	-3.37302	-7.10734	0.00725235	0.000743499	0.0901373
13939	bta-miR-98-5p	miR-98-5p	50.5219	0	56.9781	0	0	0	0	0	13.4375	2.21848	-3.31381	-7.35162	0.00612268	0.000920344	0.109252
1280	mmu-miR-187-5p	miR-187-5p	27.366	14.3299	16.2795	0	0	0	0	0	7.24693	1.9548	-3.30548	-6.46156	0.0113469	0.000948138	0.110255
27486	gso-MIR3522a-3p	MIR3522a-3p	0	79.2924	0	51.6349	0.783876	0	0	0	16.4639	2.10344	-3.29031	-6.92097	0.00825237	0.00100078	0.114049
37	aca-let-7f-1-3p	let-7f-1-3p	0	0	0	0	25.084	13.9603	14.0786	0	6.64036	1.93256	3.13947	6.0672	67.0518	0.00169255	0.189101
3029	aja-miR-143-3p	miR-143-3p	0	0	0	0	54.0874	36.6457	0	0	11.3416	2.19183	3.11998	6.83846	114.441	0.00180863	0.197288
39356	piR-hsa-19320	piR-hsa-19320	38.944	35.3472	0	0	0	0	0	0	9.2864	2.1903	-3.1157	-6.82433	0.00882411	0.00183508	0.197288
36584	piR-hsa-30137	piR-hsa-30137	0	0	0	0	8.62263	4.65342	0	44.9548	7.27885	2.00492	3.08592	6.18702	72.858	0.00202922	0.214121
33167	piR-hsa-15023	piR-hsa-15023	0	0	0	0	9.40651	0	25.9912	19.2663	6.83301	1.98052	3.07848	6.09699	68.4504	0.0020806	0.21555
20860	mml-miR-28-5p	miR-28-5p	1.05254	0	0	0.83282	65.0617	1.16335	50.8995	0	14.8762	1.8863	3.06791	5.78702	55.216	0.00215558	0.21762
35	aca-let-7e-3p	let-7e-3p	8.42032	0	17.9074	16.6564	0	0	0	0	5.37302	1.96685	-3.06496	-6.02832	0.0153212	0.00217697	0.21762
15301	cqu-mir-1891	mir-1891	28.4186	0	35.8148	0	0	0	0	0	8.02917	2.21377	-2.98404	-6.60597	0.0102661	0.0028447	0.279467
12704	bdi-MIR167c-5p	MIR167c-5p	10.5254	6.68731	8.13973	1.66564	0	0	0	0	3.37726	1.84027	-2.91055	-5.3562	0.0244131	0.0036079	0.348437
16432	eca-let-7d-3p	let-7d-3p	0	31.5259	0	16.6564	0	0	0	0	6.02279	2.19043	-2.83229	-6.20392	0.0135654	0.00462162	0.4389
16499	eca-miR-744-5p	miR-744-5p	0	2.86599	0	0	1.56775	0	86.6375	52.6613	17.9666	1.96986	2.81324	5.54169	46.5818	0.00490449	0.458128
21883	ngi-mir-929	mir-929	0	0	0	0	0	0	25.9912	35.9638	7.74438	2.23705	2.80616	6.27753	77.5755	0.0050135	0.460757
21454	mne-miR-144-3p	miR-144-3p	0	3.82132	0	2.49846	73.6843	0.581677	58.4803	10.2754	18.6677	1.59393	2.78426	4.43791	21.6743	0.00536505	0.485239
26116	tni-mir-138	mir-138	0	40.1238	0	18.322	0	0	0	1.28442	7.46629	2.0923	-2.75323	-5.76059	0.0184454	0.00590105	0.525378
7397	ola-miR-99-5p	miR-99-5p	0	0	0	0	0.783876	26.7572	0	12.8442	5.04816	2.07388	2.7351	5.67227	50.9944	0.00623611	0.546667
6776	mmu-miR-1247-3p	miR-1247-3p	0	0	0	0	9.40651	13.3786	9.74671	0	4.06647	1.96648	2.72757	5.36371	41.1754	0.0063803	0.550833
13652	bta-miR-1225-5p	miR-1225-5p	4.21016	0	6.51179	0.83282	0.783876	38.3907	19.4934	134.864	25.6359	1.51631	2.71368	4.11479	17.325	0.00665405	0.565892
25415	ssc-miR-494-3p	miR-494-3p	0	0	0	0	0	25.0121	21.6594	0	5.83394	2.20913	2.66136	5.87929	58.863	0.00778246	0.652124
3806	bta-mir-1246	mir-1246	5.2627	56.3645	76.5135	26.6503	1.56775	1.16335	1.08297	11.5598	22.5206	1.30989	-2.64925	-3.47024	0.0902308	0.00806706	0.666175
29973	mdo-miR-7359a-2-5p	miR-7359a-2-5p	0	57.3198	4.88384	3.33128	0.783876	1.16335	0	0	8.43527	1.85114	-2.64008	-4.88714	0.0337927	0.00828868	0.67297
17802	ggo-mir-138	mir-138	3.15762	0	16.2795	17.4892	0	0.581677	0	0	4.6885	1.9298	-2.63614	-5.08722	0.0294168	0.00838556	0.67297
7369	oha-miR-34a-5p	miR-34a-5p	30.5236	0	0	49.1364	1.56775	0	0	0	10.1535	2.08803	-2.621	-5.47272	0.0225188	0.00876728	0.693833
18002	gma-MIR166f	MIR166f	0	12.4193	8.13973	4.99692	0	0	0	0	3.19449	2.023	-2.6102	-5.28042	0.0257297	0.00904903	0.70632
15924	dmo-mir-124	mir-124	0	31.5259	0	27.4831	0	0.581677	1.08297	0	7.5842	1.97135	-2.59079	-5.10737	0.0290087	0.00957551	0.737314
36765	piR-hsa-30897	piR-hsa-30897	0	0	0	0	0	13.3786	0	28.2573	5.20448	2.22704	2.56219	5.70611	52.2049	0.0104013	0.790221
13841	bta-miR-27b-3p	miR-27b-3p	0	26.7492	8.13973	0	0	0	0	0	4.36112	2.25077	-2.54659	-5.73178	0.0188176	0.0108782	0.815578
13756	bta-miR-2351-3p	miR-2351-3p	1.05254	19.1066	14.6515	0	0	0.581677	0	0	4.42404	1.99096	-2.51128	-4.99986	0.0312531	0.0120293	0.89017
35742	piR-hsa-26361	piR-hsa-26361	0	0	0	0	13.3259	0	1.08297	15.4131	3.72774	2.09887	2.48805	5.22209	37.3256	0.0128445	0.938308
30983	piR-hsa-26589	piR-hsa-26589	0	0	0	0	7.83876	0	0	29.5417	4.67256	2.259	2.45481	5.54543	46.7024	0.0140959	0.999616
2540	rno-miR-184-3p	miR-184-3p	0	0	0	0	0	30.2472	0	3.85327	4.26256	2.27924	2.38409	5.43392	43.2287	0.0171212	0.999616
2607	rno-mir-485	mir-485	0	0	0	0	0	19.1954	0	12.8442	4.00495	2.24196	2.38004	5.33597	40.3914	0.0173106	0.999616
2415	odi-miR-92a-3p	miR-92a-3p	12.6305	0	14.6515	0	0	0	0	0	3.41025	2.26241	-2.37082	-5.36376	0.0242854	0.0177489	0.999616
5539	ggo-mir-29c	mir-29c	0	0	0	0	19.5969	0	11.9127	0	3.93869	2.25012	2.35997	5.31022	39.6768	0.0182764	0.999616
16991	efu-mir-202	mir-202	1.05254	0	0	0	0.783876	0.581677	2.16594	28.2573	4.10517	1.95751	2.33919	4.579	23.901	0.0193254	0.999616
23901	ppy-mir-563	mir-563	0	12.4193	13.0236	0	0	0	0	0	3.18036	2.26682	-2.323	-5.2658	0.0259917	0.0201794	0.999616
12201	asu-miR-236-5p	miR-236-5p	1.05254	0	0	0	0.783876	5.2351	27.0742	0	4.26821	2.00881	2.31687	4.65415	25.1791	0.0205106	0.999616
16154	dre-miR-181a-1-3p	miR-181a-1-3p	1.05254	0	19.5354	0.83282	0	0	0	0	2.67759	2.20944	-2.26085	-4.99523	0.0313536	0.0237684	0.999616
20469	mdm-MIR393f	MIR393f	1.05254	0.95533	0	0.83282	19.5969	23.2671	1.08297	0	5.84845	1.73658	2.23436	3.88015	14.7246	0.0254593	0.999616
20990	mml-mir-211	mir-211	0	0	0	0	0.783876	2.32671	5.41484	7.70654	2.029	1.9761	2.19204	4.33168	20.1356	0.0283768	0.999616
38573	piR-hsa-9938	piR-hsa-9938	0	0	3.25589	18.322	0	0	0	0	2.69724	2.32195	-2.17428	-5.04857	0.0302155	0.0296845	0.999616
28319	ptr-mir-640	mir-640	5.2627	6.68731	0	3.33128	0	0	0	0	1.91016	2.10387	-2.16602	-4.55702	0.0424815	0.0303096	0.999616
8789	xtr-miR-146b-5p	miR-146b-5p	0	0	0	0	2.35163	0.581677	5.41484	7.70654	2.00684	1.99286	2.16407	4.3127	19.8725	0.0304588	0.999616
3789	bta-miR-380-5p	miR-380-5p	0	0	13.0236	7.49538	0	0	0	0	2.56487	2.2971	-2.15535	-4.95105	0.0323284	0.0311345	0.999616
25398	ssc-miR-181a-1-3p	miR-181a-1-3p	0	0	1.62795	0	0	0	17.3275	14.1286	4.13551	2.15652	2.12015	4.57216	23.788	0.0339931	0.999616
17356	gga-miR-1767-3p	miR-1767-3p	0	0	0	0	0	1.16335	1.08297	17.9819	2.52853	2.20045	2.11139	4.64599	25.037	0.0347392	0.999616
23602	ppt-MIR1044	MIR1044	0	6.68731	8.13973	0.83282	0	0	0	0	1.95748	2.17837	-2.09236	-4.55793	0.0424548	0.0364063	0.999616
18947	hsa-miR-1911-5p	miR-1911-5p	0	1.91066	0	0.83282	3.91938	1.74503	36.8209	0	5.6536	1.84335	2.08479	3.843	14.3502	0.0370879	0.999616
13625	bra-MIR5723	MIR5723	0	0	1.62795	0	1.56775	4.65342	6.49781	5.13769	2.43558	1.8157	2.07124	3.76075	13.555	0.0383364	0.999616
29501	bta-let-7f-2-3p	let-7f-2-3p	1.05254	1.91066	1.62795	0	1.56775	4.07174	19.4934	14.1286	5.48159	1.51222	2.07006	3.13038	8.75665	0.038447	0.999616
30726	mmu-let-7f-2-3p	let-7f-2-3p	1.05254	1.91066	1.62795	0	1.56775	4.07174	19.4934	14.1286	5.48159	1.51222	2.07006	3.13038	8.75665	0.038447	0.999616
30869	hsa-let-7f-2-3p	let-7f-2-3p	1.05254	1.91066	1.62795	0	1.56775	4.07174	19.4934	14.1286	5.48159	1.51222	2.07006	3.13038	8.75665	0.038447	0.999616
13876	bta-miR-429-3p	miR-429-3p	0	0.95533	19.5354	0	0	0	0	0	2.56134	2.38504	-2.06864	-4.93379	0.0327177	0.0385797	0.999616
21633	mtr-MIR2609b	MIR2609b	0	0	0	0	0	0	0	30.8261	3.85327	2.54505	2.06849	5.26441	38.4366	0.0385941	0.999616
36623	piR-hsa-30312	piR-hsa-30312	9.47286	0.95533	9.76768	0	0	0	1.08297	0	2.65985	2.0329	-2.067	-4.20199	0.0543345	0.0387345	0.999616
4189	cgr-miR-205-5p	miR-205-5p	0	0	0	0	3.91938	16.8686	0	0	2.5985	2.29815	2.0578	4.72913	26.5222	0.0396094	0.999616
17620	gga-mir-1730	mir-1730	0	0.95533	8.13973	5.82974	0	0	0	0	1.8656	2.18363	-2.05649	-4.49061	0.0444827	0.039735	0.999616
24348	ptr-mir-499	mir-499	4.21016	3.82132	3.25589	0.83282	0	0	0	0	1.51502	2.04492	-2.05363	-4.1995	0.0544281	0.0400113	0.999616
809	cte-let-7-5p	let-7-5p	0	0	0	0	0	0	29.2401	0	3.65502	2.54439	2.04178	5.19509	36.6334	0.0411733	0.999616
5979	hsa-miR-3159-3p	miR-3159-3p	0	23.8832	0	0.83282	0	0.581677	0	0	3.16222	2.22681	-2.03103	-4.52271	0.0435039	0.042252	0.999616
17877	ghr-MIR2949b-3p	MIR2949b-3p	0	0	0	0	1.56775	0	0	20.5508	2.76481	2.36055	2.02464	4.77926	27.4601	0.0429047	0.999616
12805	bdi-MIR7722	MIR7722	0	0.95533	0	0	4.70325	4.65342	6.49781	1.28442	2.26178	1.83936	2.02032	3.71611	13.142	0.0433497	0.999616
14803	cgr-miR-338-5p	miR-338-5p	2.10508	4.77665	11.3956	0	0	0.581677	0	0	2.35738	2.02351	-2.00126	-4.04957	0.0603888	0.0453639	0.999616
911	efu-miR-219-5p	miR-219-5p	0	0	0	0	0	0	27.0742	0	3.38428	2.55248	1.99165	5.08365	33.9102	0.0464093	0.999616
31118	piR-hsa-11909	piR-hsa-11909	0	0	0	0	1.56775	1.16335	6.49781	3.85327	1.63527	2.01977	1.99101	4.02138	16.2389	0.0464793	0.999616
35743	piR-hsa-26362	piR-hsa-26362	0	21.9726	0	0	0	0	0	0	2.74657	2.55014	-1.98902	-5.07228	0.0297229	0.0466986	0.999616
14943	chi-mir-487b	mir-487b	0	8.59797	8.13973	0	0	0	0	0	2.09221	2.34265	-1.98878	-4.65902	0.0395817	0.0467252	0.999616
112	aca-miR-204a-1-5p	miR-204a-1-5p	0	0	22.7912	0	0	0	0	0	2.84891	2.56329	-1.98692	-5.09305	0.029298	0.0469317	0.999616
251	bbe-let-7a-1-5p	let-7a-1-5p	0	0	22.7912	0	0	0	0	0	2.84891	2.56329	-1.98692	-5.09305	0.029298	0.0469317	0.999616
17792	ggo-miR-93-3p	miR-93-3p	0	0	22.7912	0	0	0	0	0	2.84891	2.56329	-1.98692	-5.09305	0.029298	0.0469317	0.999616
7940	ppy-miR-4451-3p	miR-4451-3p	0	0	0	0	0	0	0	26.9729	3.37161	2.55883	1.98144	5.07016	33.5946	0.0475422	0.999616
29615	cfa-mir-365-2	mir-365-2	0	0	0	0	1.56775	0	0	19.2663	2.60426	2.36813	1.98135	4.6921	25.8501	0.0475516	0.999616
21820	mtr-MIR5286b-3p	MIR5286b-3p	0	0	0	0	0	1.16335	4.33187	10.2754	1.97133	2.17411	1.97102	4.28522	19.4975	0.0487218	0.999616
37002	piR-hsa-31921	piR-hsa-31921	1.05254	1.91066	4.88384	3.33128	0	0	0	0	1.39729	2.07189	-1.96626	-4.07386	0.0593808	0.0492688	0.999616
24	aae-miR-999-3p	miR-999-3p	0	21.0173	0	0	0	0	0	0	2.62716	2.55753	-1.95831	-5.00844	0.0310677	0.0501936	0.999616
13083	bma-miR-92-3p	miR-92-3p	0	21.0173	0	0	0	0	0	0	2.62716	2.55753	-1.95831	-5.00844	0.0310677	0.0501936	0.999616
5421	gga-mir-214	mir-214	21.0508	0	0	0	0	0	0	0	2.63135	2.56078	-1.95479	-5.00579	0.0311248	0.0506077	0.999616
36982	piR-hsa-31833	piR-hsa-31833	21.0508	0	0	0	0	0	0	0	2.63135	2.56078	-1.95479	-5.00579	0.0311248	0.0506077	0.999616
4663	eca-miR-346-3p	miR-346-3p	27.366	0	0	0	0	0	0	1.28442	3.58131	2.38539	-1.95469	-4.66271	0.0394807	0.0506192	0.999616
793	chi-mir-376a	mir-376a	0	0	0	0	0	0	0	25.6885	3.21106	2.56459	1.94929	4.99914	31.981	0.0512604	0.999616
26785	bta-mir-2320	mir-2320	0	0	0	0	0.783876	2.32671	1.08297	8.99096	1.64806	2.0743	1.94156	4.02738	16.3065	0.0521909	0.999616
14867	chi-miR-331-3p	miR-331-3p	0	0	0	0	0	0	24.9083	0	3.11353	2.56258	1.93668	4.96289	31.1873	0.0527848	0.999616
5958	hsa-miR-199a-1-3p	miR-199a-1-3p	0	0	0	0	10.1904	1.74503	0	2.56885	1.81303	2.17701	1.92844	4.19824	18.3568	0.0538002	0.999616
7250	oan-miR-205-5p	miR-205-5p	0	20.0619	0	0	0	0	0	0	2.50774	2.56579	-1.92597	-4.94163	0.0325403	0.0541085	0.999616
198	age-miR-214-5p	miR-214-5p	0	0	0	0	0	0	0	24.404	3.0505	2.57119	1.91525	4.92446	30.3676	0.055461	0.999616
7879	ppt-MIR160d	MIR160d	0	0	0	0	0	0.581677	2.16594	12.8442	1.94898	2.23744	1.90623	4.26506	19.227	0.0566208	0.999616
23829	ppy-mir-1254	mir-1254	0	0	0	0.83282	0.783876	8.14348	9.74671	0	2.43836	2.0279	1.89391	3.84066	14.3269	0.0582373	0.999616
11	aae-miR-14-3p	miR-14-3p	0	19.1066	0	0	0	0	0	0	2.38832	2.57505	-1.89183	-4.87157	0.0341595	0.0585134	0.999616
6488	isc-miR-315-5p	miR-315-5p	0	19.1066	0	0	0	0	0	0	2.38832	2.57505	-1.89183	-4.87157	0.0341595	0.0585134	0.999616
31065	piR-hsa-7239	piR-hsa-7239	0	19.1066	0	0	0	0	0	0	2.38832	2.57505	-1.89183	-4.87157	0.0341595	0.0585134	0.999616
21822	mtr-MIR5287b	MIR5287b	5.2627	2.86599	0	3.33128	0	0	0	0	1.4325	2.19428	-1.88877	-4.14448	0.0565441	0.058923	0.999616
11467	aae-mir-309b	mir-309b	3.15762	0.95533	8.13973	1.66564	0	0	0	1.28442	1.90034	1.93162	-1.88869	-3.64825	0.079757	0.0589328	0.999616
4573	dre-miR-212-5p	miR-212-5p	8.42032	0	0	5.82974	0	0	0	0	1.78126	2.35948	-1.88736	-4.45318	0.0456521	0.0591124	0.999616
4934	efu-miR-485-5p	miR-485-5p	0	0	19.5354	0	0	0	0	0	2.44192	2.58948	-1.87965	-4.86731	0.0342604	0.0601564	0.999616
19395	hsa-miR-6132-5p	miR-6132-5p	3.15762	4.77665	3.25589	1.66564	0	0	0	1.28442	1.76753	1.89768	-1.87964	-3.56697	0.0843794	0.060157	0.999616
4247	chi-mir-346	mir-346	0	0	0	0	0	0	0	23.1196	2.88995	2.57876	1.87909	4.84572	28.7546	0.060232	0.999616
4924	efu-miR-29b-3p	miR-29b-3p	0	0	0	0	0	0	0	23.1196	2.88995	2.57876	1.87909	4.84572	28.7546	0.060232	0.999616
28567	tni-miR-10c-3p	miR-10c-3p	6.31524	0	0	7.49538	0	0	0	0	1.72633	2.36744	-1.86318	-4.41095	0.047008	0.0624375	0.999616
8644	tca-mir-3845	mir-3845	0	0	0	0.83282	3.1355	1.16335	5.41484	5.13769	1.96053	1.87259	1.8602	3.48339	11.1842	0.0628578	0.999616
17896	ghr-MIR7489	MIR7489	0	0	0	0	1.56775	0.581677	2.16594	7.70654	1.50274	2.09141	1.85854	3.88697	14.7943	0.0630923	0.999616
21334	mmu-mir-3964	mir-3964	0	0.95533	0	0	0.783876	1.74503	6.49781	6.42211	2.05052	1.90326	1.85747	3.53526	11.5936	0.0632436	0.999616
38632	piR-hsa-10572	piR-hsa-10572	4.21016	7.64264	1.62795	0.83282	14.1098	2.90839	34.655	24.404	11.2988	1.28669	1.85714	2.38957	5.24002	0.0632909	0.999616
4935	efu-miR-494-3p	miR-494-3p	0	18.1513	0	0	0	0	0	0	2.26891	2.58548	-1.85572	-4.79792	0.0359486	0.0634936	0.999616
15351	crm-miR-1822-5p	miR-1822-5p	0	0	0	0	0	0	2.16594	15.4131	2.19738	2.39564	1.85465	4.44306	21.7518	0.0636469	0.999616
27235	eca-miR-590-5p	miR-590-5p	0	0	0	0	1.56775	2.90839	5.41484	1.28442	1.39693	2.06253	1.84864	3.81287	14.0537	0.0645096	0.999616
5779	gra-MIR8665	MIR8665	1.05254	4.77665	9.76768	0	0	0	0	1.28442	2.11016	2.06972	-1.84486	-3.81834	0.0708869	0.0650579	0.999616
14899	chi-mir-181c	mir-181c	17.8932	0	0	0	0	0	0	0	2.23665	2.59203	-1.84093	-4.77174	0.036607	0.0656325	0.999616
25860	tca-mir-193	mir-193	37.8914	75.471	19.5354	14.9908	43.1132	11.0519	586.969	120.736	113.72	1.28419	1.83993	2.36281	5.14372	0.0657785	0.999616
19651	hsa-mir-144	mir-144	0	0	0	0	0	0	1.08297	16.6975	2.22256	2.42543	1.83868	4.45959	22.0023	0.0659629	0.999616
15578	cte-mir-2693	mir-2693	0	0	0	0	2.35163	0.581677	2.16594	6.42211	1.44017	2.08468	1.83732	3.83023	14.2238	0.0661627	0.999616
35745	piR-hsa-26366	piR-hsa-26366	0	0	0	17.4892	0	0	0	0	2.18615	2.58843	-1.83579	-4.75182	0.0371158	0.0663882	0.999616
22775	osa-MIR531b-3p	MIR531b-3p	0	1.91066	4.88384	7.49538	0	0	1.08297	0	1.92161	2.04545	-1.81987	-3.72246	0.0757579	0.0687782	0.999616
11774	aly-MIR3442-3p	MIR3442-3p	0	3.82132	8.13973	2.49846	0	0.581677	0	0	1.88015	2.0434	-1.81809	-3.71507	0.0761468	0.0690509	0.999616
1094	hsa-miR-339-5p	miR-339-5p	0	17.1959	0	0	0	0	0	0	2.14949	2.59726	-1.81742	-4.7203	0.0379357	0.0691536	0.999616
12081	ame-mir-750	mir-750	0	0	0	0	1.56775	3.49006	4.33187	1.28442	1.33426	2.07223	1.81079	3.75237	13.4765	0.0701735	0.999616
21892	nta-MIR156g	MIR156g	3.15762	5.73198	4.88384	3.33128	1.56775	0	0	0	2.33406	1.80413	-1.80128	-3.24975	0.10513	0.0716581	0.999616
22294	oar-miR-379-5p	miR-379-5p	0	0	0	16.6564	0	0	0	0	2.08205	2.59955	-1.8011	-4.68206	0.0389547	0.071687	0.999616
14364	ccr-miR-199-5p	miR-199-5p	0	0	0	0	0	0	0	20.5508	2.56885	2.59757	1.7994	4.67408	25.5292	0.071955	0.999616
26290	xtr-miR-132-3p	miR-132-3p	1.05254	0	0	12.4923	0	0	0	0	1.69311	2.44088	-1.79822	-4.38923	0.0477211	0.0721422	0.999616
5476	gga-mir-6665	mir-6665	1.05254	0	1.62795	0	6.271	5.2351	2.16594	5.13769	2.68628	1.70505	1.79299	3.05715	8.32324	0.0729745	0.999616
4250	chi-mir-377	mir-377	0	0	0	0	0	10.4702	4.33187	0	1.85026	2.37196	1.78588	4.23604	18.8441	0.0741184	0.999616
17162	fru-miR-194-5p	miR-194-5p	1.05254	0	13.0236	0	0	0	0	0	1.75951	2.45607	-1.78436	-4.38252	0.0479434	0.0743647	0.999616
720	cgr-miR-412-3p	miR-412-3p	50.5219	36.3025	60.234	28.3159	0	0	0	23.1196	24.8117	1.65759	-1.78295	-2.95539	0.128925	0.0745949	0.999616
3031	aja-mir-143	mir-143	0	16.2406	0	0	0	0	0	0	2.03008	2.61064	-1.77667	-4.63825	0.0401558	0.0756223	0.999616
40268	piR-hsa-3532	piR-hsa-3532	0	0	0	0	0	0	19.4934	0	2.43668	2.60116	1.77141	4.60772	24.3816	0.0764928	0.999616
37574	piR-hsa-5421	piR-hsa-5421	8.42032	5.73198	0	1.66564	6.271	11.0519	42.2358	20.5508	11.9909	1.31273	1.76163	2.31255	4.9676	0.0781318	0.999616
2394	oan-miR-194-1-5p	miR-194-1-5p	0	0	0	0	18.813	0	0	0	2.35163	2.59654	1.76103	4.57258	23.795	0.078233	0.999616
14622	cfa-miR-223-3p	miR-223-3p	0	0	0	0	18.813	0	0	0	2.35163	2.59654	1.76103	4.57258	23.795	0.078233	0.999616
21084	mmu-miR-106b-5p	miR-106b-5p	0	0	0	0	18.813	0	0	0	2.35163	2.59654	1.76103	4.57258	23.795	0.078233	0.999616
16771	efu-miR-145-3p	miR-145-3p	0	0	0	0	0	13.9603	1.08297	0	1.8804	2.42818	1.75718	4.26675	19.2496	0.0788866	0.999616
14797	cgr-miR-222-3p	miR-222-3p	0	0	0	0	0	0	0	19.2663	2.40829	2.60923	1.7553	4.57998	23.9173	0.0792077	0.999616
21456	mne-miR-93-3p	miR-93-3p	0	0	0	0	0	0	0	19.2663	2.40829	2.60923	1.7553	4.57998	23.9173	0.0792077	0.999616
2727	xtr-miR-200b-5p	miR-200b-5p	0	0	16.2795	0	0	0	0	0	2.03493	2.62866	-1.74992	-4.59994	0.0412362	0.0801324	0.999616
24218	ptc-MIR6462c	MIR6462c	0	0	0	0	0	1.74503	12.9956	0	1.84258	2.40337	1.74955	4.20481	18.4406	0.0801962	0.999616
23786	ppy-miR-548a-3p	miR-548a-3p	0	0	0	0	0	3.49006	10.8297	0	1.78997	2.38356	1.74876	4.16827	17.9793	0.0803332	0.999616
12302	ata-MIR172c	MIR172c	4.21016	2.86599	4.88384	3.33128	0.783876	0	1.08297	0	2.14476	1.7371	-1.74802	-3.03648	0.121879	0.0804612	0.999616
8494	ssa-miR-30b-5p	miR-30b-5p	0	4.77665	8.13973	0.83282	0	0	0	1.28442	1.8792	2.08704	-1.74321	-3.63814	0.0803179	0.0812976	0.999616
39775	piR-hsa-24760	piR-hsa-24760	0	0	0	0	0.783876	0.581677	5.41484	3.85327	1.32921	2.13641	1.73852	3.7142	13.1246	0.0821185	0.999616
15076	cin-miR-5603-5p	miR-5603-5p	7.36778	5.73198	4.88384	4.1641	0	1.16335	2.16594	0	3.18462	1.56639	-1.7375	-2.72161	0.151605	0.0822988	0.999616
21768	mtr-MIR5232-5p	MIR5232-5p	0	0	0	0	0.783876	3.49006	0	7.70654	1.49756	2.24588	1.73655	3.90009	14.9295	0.0824664	0.999616
14791	cgr-miR-181d-5p	miR-181d-5p	0	0	0	0	0	7.5618	0	6.42211	1.74799	2.38471	1.73583	4.13945	17.6238	0.0825939	0.999616
176	aga-miR-263a-5p	miR-263a-5p	0	15.2853	0	0	0	0	0	0	1.91066	2.62591	-1.7332	-4.55123	0.0426522	0.08306	0.999616
16777	efu-miR-18-5p	miR-18-5p	0	15.2853	0	0	0	0	0	0	1.91066	2.62591	-1.7332	-4.55123	0.0426522	0.08306	0.999616
16797	efu-miR-30d-3p	miR-30d-3p	0	15.2853	0	0	0	0	0	0	1.91066	2.62591	-1.7332	-4.55123	0.0426522	0.08306	0.999616
24865	sha-miR-181a-1-3p	miR-181a-1-3p	0	15.2853	0	0	0	0	0	0	1.91066	2.62591	-1.7332	-4.55123	0.0426522	0.08306	0.999616
30985	piR-hsa-26593	piR-hsa-26593	0	15.2853	0	0	0	0	0	0	1.91066	2.62591	-1.7332	-4.55123	0.0426522	0.08306	0.999616
15691	der-mir-289	mir-289	0	0	8.13973	4.1641	0	0	0	0	1.53798	2.42617	-1.73304	-4.20466	0.054234	0.0830878	0.999616
14933	chi-mir-376e	mir-376e	0	0	0	0	0	0	18.4105	0	2.30131	2.61234	1.73211	4.52487	23.0208	0.0832535	0.999616
4993	efu-mir-1343	mir-1343	0	0	0	0	0	0	5.41484	8.99096	1.80072	2.40619	1.72698	4.15544	17.8202	0.0841707	0.999616
13281	bmo-miR-3239-5p	miR-3239-5p	0	2.86599	0	1.66564	1.56775	0	31.4061	7.70654	5.6515	1.7937	1.72293	3.09042	8.51745	0.0849013	0.999616
279	bta-let-7a-1-3p	let-7a-1-3p	0	0	0	0	0	0	0	17.9819	2.24774	2.62303	1.7077	4.47935	22.3058	0.0876925	0.999616
30638	hsa-mir-221	mir-221	3.15762	3.82132	3.25589	0.83282	0	0	0	1.28442	1.54401	1.95887	-1.70705	-3.34389	0.0984895	0.0878124	0.999616
36727	piR-hsa-30759	piR-hsa-30759	0	1.91066	0	0	5.48713	6.39845	2.16594	3.85327	2.47693	1.80258	1.7055	3.0743	8.42278	0.0881017	0.999616
40864	ACA39	9	2.10508	2.86599	1.62795	4.1641	0	0	1.08297	0	1.48076	1.95255	-1.70521	-3.32952	0.0994753	0.0881545	0.999616
5355	gga-mir-146b	mir-146b	0	0.95533	0	0	4.70325	1.74503	3.2489	2.56885	1.65267	1.90114	1.69622	3.22476	9.34865	0.0898443	0.999616
18608	hco-miR-5887-3p	miR-5887-3p	0	0	0	0.83282	1.56775	10.4702	0	2.56885	1.92995	2.06794	1.69399	3.50307	11.3378	0.0902668	0.999616
16770	efu-miR-139-5p	miR-139-5p	0	0	0	0	0	0	17.3275	0	2.16594	2.62515	1.69018	4.43698	21.6602	0.0909941	0.999616
22108	oan-miR-138-1-3p	miR-138-1-3p	0	0	0	0	0	9.88851	3.2489	0	1.64218	2.41136	1.68675	4.06735	16.7646	0.0916522	0.999616
19621	hsa-miR-93-3p	miR-93-3p	0	14.3299	0	0	0	0	0	0	1.79124	2.64345	-1.68666	-4.45861	0.0454804	0.0916684	0.999616
2321	mmu-mir-690	mir-690	0	6.68731	4.88384	0	0	0	0	0	1.44639	2.45102	-1.68386	-4.12717	0.0572267	0.0922087	0.999616
19003	hsa-miR-3190-3p	miR-3190-3p	15.7881	15.2853	4.88384	3.33128	2.35163	1.74503	1.08297	3.85327	6.04017	1.27795	-1.68054	-2.14764	0.225681	0.0928518	0.999616
28446	ssa-miR-723-1-3p	miR-723-1-3p	7.36778	3.82132	0	0	0	0	0	0	1.39864	2.44699	-1.6757	-4.10041	0.0582981	0.0937977	0.999616
15235	cpa-MIR162a-3p	MIR162a-3p	0	0	0	0	0	12.2152	0	1.28442	1.68746	2.45389	1.67493	4.11011	17.2689	0.0939472	0.999616
52	aca-miR-124a-1-5p	miR-124a-1-5p	0	0	14.6515	0	0	0	0	0	1.83144	2.65579	-1.6738	-4.44525	0.0459034	0.0941698	0.999616
26109	tni-mir-107	mir-107	1.05254	2.86599	6.51179	0.83282	0	0	1.08297	0	1.54326	1.99603	-1.67363	-3.34062	0.0987129	0.0942036	0.999616
18501	gsa-miR-9404-5p	miR-9404-5p	3.15762	3.82132	4.88384	1.66564	0.783876	0.581677	0	0	1.86175	1.78371	-1.67328	-2.98465	0.126337	0.0942714	0.999616
1690	mmu-miR-574-5p	miR-574-5p	0	0	0	0	0	16.287	0	0	2.03587	2.61688	1.67301	4.37805	20.7934	0.0943263	0.999616
17381	gga-miR-181b-1-5p	miR-181b-1-5p	0	0	0	0	0	16.287	0	0	2.03587	2.61688	1.67301	4.37805	20.7934	0.0943263	0.999616
792	chi-mir-323a	mir-323a	0	0	0	0	5.48713	0	0	7.70654	1.64921	2.41503	1.67259	4.03936	16.4425	0.094408	0.999616
24074	ptc-MIR162a-3p	MIR162a-3p	0	9.5533	4.88384	0	0	0	1.08297	0	1.94001	2.2407	-1.66497	-3.7307	0.0753262	0.0959178	0.999616
34736	piR-hsa-21792	piR-hsa-21792	9.47286	20.0619	4.88384	2.49846	18.0291	4.65342	69.31	62.9367	23.9808	1.23715	1.6643	2.05899	4.16694	0.0960524	0.999616
929	efu-mir-21	mir-21	0	1.91066	0	1.66564	2.35163	2.90839	3.2489	16.6975	3.59784	1.6201	1.66402	2.69587	6.47945	0.0961088	0.999616
25016	sly-MIR169d	MIR169d	4.21016	6.68731	0	0	0	0	0	0	1.36218	2.45428	-1.65639	-4.06526	0.0597358	0.097642	0.999616
32910	piR-hsa-13991	piR-hsa-13991	4.21016	4.77665	6.51179	1.66564	0	1.16335	0	1.28442	2.4515	1.68854	-1.65582	-2.79592	0.143994	0.0977585	0.999616
31174	piR-hsa-15022	piR-hsa-15022	0	0.95533	0	0	1.56775	1.16335	4.33187	5.13769	1.6445	1.92949	1.65438	3.19211	9.13947	0.0980497	0.999616
11706	age-mir-9	mir-9	8.42032	2.86599	0	0.83282	0	0.581677	0	0	1.5876	2.11623	-1.65277	-3.49764	0.0885332	0.0983781	0.999616
11843	aly-MIR842	MIR842	0	0	0	0	0	0.581677	5.41484	5.13769	1.39178	2.28823	1.6521	3.78037	13.7406	0.098515	0.999616
18313	gra-MIR7484n-5p	MIR7484n-5p	4.21016	2.86599	4.88384	0	0.783876	0	0	0	1.59298	2.08548	-1.65165	-3.44447	0.0918567	0.0986065	0.999616
2366	mmu-mir-8098	mir-8098	6.31524	1.91066	4.88384	0.83282	0	0.581677	1.08297	0	1.9509	1.81612	-1.65087	-2.99817	0.125158	0.0987654	0.999616
22926	pab-MIR3709b-5p	MIR3709b-5p	3.15762	0	0	0	14.8936	0	14.0786	1.28442	4.17678	1.96397	1.64954	3.23964	9.44561	0.0990376	0.999616
28369	sbi-MIR390-3p	MIR390-3p	13.683	0	0	0	0	0	0	0	1.71038	2.66033	-1.64846	-4.38545	0.0478464	0.0992584	0.999616
36149	piR-hsa-28198	piR-hsa-28198	0	7.64264	6.51179	0	0.783876	0	0	0	1.86729	2.24382	-1.64618	-3.69374	0.0772812	0.0997257	0.999616
24276	ptr-miR-2392-5p	miR-2392-5p	0	0	0	0	0	0	16.2445	0	2.03057	2.63993	1.64527	4.3434	20.2999	0.0999144	0.999616
8347	sha-mir-200b	mir-200b	3.15762	7.64264	0	0	0	0	0	0	1.35003	2.46495	-1.64436	-4.05327	0.0602343	0.100101	0.999616
8926	age-mir-127	mir-127	0	0	8.13973	5.82974	0	0	0	1.28442	1.90674	2.23374	-1.64362	-3.67143	0.0784857	0.100254	0.999616
34870	piR-hsa-22486	piR-hsa-22486	0	0.95533	0	0	2.35163	1.16335	3.2489	5.13769	1.60711	1.92414	1.64188	3.15919	8.93331	0.100616	0.999616
26891	cfa-let-7j-5p	let-7j-5p	0	0	0	13.3251	0	0	0	0	1.66564	2.65987	-1.64036	-4.36314	0.0485919	0.100931	0.999616
2514	ppy-let-7a-1-3p	let-7a-1-3p	0	13.3746	0	0	0	0	0	0	1.67183	2.66374	-1.63665	-4.35961	0.048711	0.101703	0.999616
14802	cgr-miR-31-5p	miR-31-5p	0	13.3746	0	0	0	0	0	0	1.67183	2.66374	-1.63665	-4.35961	0.048711	0.101703	0.999616
17402	gga-miR-222a-3p	miR-222a-3p	0	13.3746	0	0	0	0	0	0	1.67183	2.66374	-1.63665	-4.35961	0.048711	0.101703	0.999616
1045	ggo-mir-485	mir-485	0	9.5533	1.62795	0	0	0	0	0	1.39766	2.50265	-1.63665	-4.09596	0.058478	0.101704	0.999616
3778	bta-miR-302b-3p	miR-302b-3p	0	0	0	0	15.6775	0	0	0	1.95969	2.63717	1.63462	4.31076	19.8457	0.10213	0.999616
20921	mml-miR-622-5p	miR-622-5p	0	5.73198	1.62795	4.1641	0	0	1.08297	0	1.57587	2.0988	-1.63327	-3.42791	0.0929173	0.102412	0.999616
17746	ggo-miR-193a-3p	miR-193a-3p	1.05254	4.77665	0	0	25.8679	0	27.0742	0	7.34641	1.92987	1.63251	3.15052	8.87978	0.102573	0.999616
15734	dgr-miR-315-5p	miR-315-5p	2.10508	8.59797	0	0	0	0	0	0	1.33788	2.48288	-1.62758	-4.04109	0.0607449	0.103613	0.999616
23357	ppc-miR-8364w-5p	miR-8364w-5p	0	21.0173	9.76768	11.6595	4.70325	0	1.08297	1.28442	6.18938	1.58956	-1.62717	-2.58648	0.166491	0.1037	0.999616
21037	mml-mir-557	mir-557	0	0	0	0	1.56775	0	6.49781	2.56885	1.3293	2.2871	1.62691	3.72091	13.1858	0.103755	0.999616
22573	osa-MIR169d	MIR169d	9.47286	3.82132	0	4.99692	0	1.74503	0	0	2.50452	1.93688	-1.62221	-3.14203	0.11328	0.104758	0.999616
17385	gga-miR-193b-3p	miR-193b-3p	0	0	0	0	0	15.1236	0	0	1.89045	2.63536	1.62117	4.27237	19.3247	0.104981	0.999616
2608	rno-mir-495	mir-495	0	0	0	0	0	3.49006	8.66375	0	1.51923	2.42737	1.62049	3.93352	15.2795	0.105128	0.999616
29994	mml-miR-762-2-5p	miR-762-2-5p	3.15762	4.77665	4.88384	4.99692	0.783876	1.74503	0	0	2.54299	1.62899	-1.61655	-2.63336	0.161168	0.105974	0.999616
19507	hsa-miR-6826-5p	miR-6826-5p	2.10508	2.86599	3.25589	1.66564	0	0	0	1.28442	1.39713	1.9677	-1.61629	-3.18037	0.110309	0.106032	0.999616
40758	mgU2-25/61	-0.409836	0	0	0	0	0	0	0	15.4131	1.92663	2.65867	1.60018	4.25436	19.0849	0.109558	0.999616
4041	cfa-miR-339-1-5p	miR-339-1-5p	0	0	0	0	14.8936	0	0	0	1.8617	2.65037	1.59869	4.23711	18.8581	0.10989	0.999616
24485	rco-MIR403b	MIR403b	4.21016	132.791	1.62795	11.6595	203.808	8.14348	421.275	111.745	111.907	1.44785	1.59274	2.30606	4.9453	0.111218	0.999616
18943	hsa-miR-181c-3p	miR-181c-3p	0	0	0	0	5.48713	0	0	6.42211	1.48866	2.4463	1.59133	3.89288	14.855	0.111535	0.999616
27715	mdm-MIR390c-5p	MIR390c-5p	0	0.95533	0	1.66564	1.56775	1.16335	2.16594	15.4131	2.86639	1.75557	1.58534	2.78316	6.88361	0.11289	0.999616
334	bta-miR-184-3p	miR-184-3p	0	23.8832	3.25589	0.83282	0	0	3.2489	0	3.90261	2.00745	-1.58523	-3.18226	0.110165	0.112914	0.999616
15909	dme-mir-990	mir-990	2.10508	1.91066	0	0	1.56775	1.74503	1.08297	23.1196	3.94139	1.7182	1.5802	2.71509	6.56633	0.114062	0.999616
6537	lus-MIR172b	MIR172b	1.05254	0	0	0	0.783876	3.49006	8.66375	0	1.74878	2.09189	1.57909	3.30327	9.87154	0.114316	0.999616
25256	smr-miR-3930-3p	miR-3930-3p	1.05254	0	0	15.8236	0.783876	0.581677	0	0	2.28021	2.12558	-1.57735	-3.35277	0.0978848	0.114716	0.999616
17225	gga-miR-1465-5p	miR-1465-5p	2.10508	0	11.3956	0	0.783876	0	0	0	1.78557	2.28852	-1.57162	-3.59667	0.0826597	0.11604	0.999616
12781	bdi-MIR5185i-3p	MIR5185i-3p	3.15762	2.86599	4.88384	0	0	0	1.08297	0	1.4988	2.10471	-1.57127	-3.30706	0.101036	0.116121	0.999616
8478	sof-MIR408a	MIR408a	0	0	0	0	0	10.4702	0	1.28442	1.46933	2.49147	1.57016	3.912	15.0532	0.116378	0.999616
9399	cfa-miR-8799c-3p	miR-8799c-3p	1.05254	4.77665	3.25589	0.83282	0.783876	0	0	0	1.33772	2.02845	-1.57014	-3.18496	0.109959	0.116381	0.999616
12926	bfl-miR-4868b-3p	miR-4868b-3p	0	0	1.62795	0	0	1.74503	3.2489	7.70654	1.79105	2.07131	1.56793	3.24767	9.49828	0.116898	0.999616
16851	efu-miR-9209c-3p	miR-9209c-3p	0	0	0	1.66564	4.70325	1.74503	0	11.5598	2.45922	2.00915	1.56658	3.1475	8.86117	0.117213	0.999616
16766	efu-miR-1343-5p	miR-1343-5p	0	0	0	0	7.05488	0	4.33187	0	1.42334	2.45756	1.56392	3.84343	14.3545	0.117835	0.999616
38465	piR-hsa-946	piR-hsa-946	0	0	0	1.66564	2.35163	2.32671	9.74671	1.28442	2.17189	1.89177	1.56178	2.95453	7.75182	0.118339	0.999616
8771	vvi-MIR3637	MIR3637	0	0.95533	3.25589	0	0.783876	1.16335	15.1616	7.70654	3.62832	1.72701	1.56076	2.69544	6.47751	0.118581	0.999616
13485	bmo-mir-3239	mir-3239	9.47286	0.95533	11.3956	3.33128	0.783876	1.16335	2.16594	1.28442	3.81908	1.42589	-1.55823	-2.22188	0.214362	0.119178	0.999616
19645	hsa-mir-1302-1	mir-1302-1	3.15762	6.68731	0	0.83282	0.783876	0	0	0	1.4327	2.1354	-1.55573	-3.3221	0.099988	0.119773	0.999616
18366	gra-MIR8652	MIR8652	1.05254	3.82132	1.62795	0	2.35163	4.65342	21.6594	3.85327	4.87744	1.49393	1.55549	2.3238	5.00647	0.119829	0.999616
22126	oan-miR-1419e-3p	miR-1419e-3p	5.2627	3.82132	1.62795	0	0	0	1.08297	0	1.47437	2.12787	-1.55454	-3.30784	0.100981	0.120057	0.999616
32336	piR-hsa-12085	piR-hsa-12085	1.05254	3.82132	4.88384	2.49846	0	0.581677	0	1.28442	1.76528	1.81773	-1.54841	-2.8146	0.142142	0.121523	0.999616
16175	dre-miR-222a-3p	miR-222a-3p	0	0	0	0	0	0	14.0786	0	1.75982	2.67718	1.54486	4.13585	17.5799	0.122381	0.999616
32809	piR-hsa-13630	piR-hsa-13630	0	0	0	11.6595	0	0	0	0	1.45744	2.70412	-1.54298	-4.1724	0.0554604	0.122837	0.999616
32810	piR-hsa-13631	piR-hsa-13631	0	0	0	0	0	0	0	14.1286	1.76608	2.68195	1.53891	4.12728	17.4757	0.123827	0.999616
2544	rno-miR-193a-5p	miR-193a-5p	0	0	0	0	0	13.3786	0	0	1.67232	2.66978	1.53481	4.0976	17.1199	0.12483	0.999616
12770	bdi-MIR5181a-3p	MIR5181a-3p	1.05254	1.91066	8.13973	0	0.783876	0	0	0	1.48585	2.16322	-1.52998	-3.30968	0.100853	0.126023	0.999616
12898	bfl-miR-153-5p	miR-153-5p	0	0	0	1.66564	1.56775	0.581677	12.9956	1.28442	2.26189	1.97189	1.52883	3.01469	8.0819	0.126306	0.999616
13390	bmo-miR-3422-3p	miR-3422-3p	1.05254	1.91066	0	0.83282	0.783876	0.581677	18.4105	3.85327	3.42816	1.67216	1.5282	2.55539	5.87827	0.126464	0.999616
13669	bta-miR-181a-1-3p	miR-181a-1-3p	11.5779	0	0	0	0	0	0	0	1.44724	2.71504	-1.52665	-4.14492	0.056527	0.126848	0.999616
23846	ppy-mir-183	mir-183	2.10508	2.86599	0	4.99692	0	0.581677	0	0	1.31871	2.12071	-1.52505	-3.23419	0.10627	0.127247	0.999616
25781	tca-miR-3811b-3p	miR-3811b-3p	6.31524	3.82132	4.88384	4.1641	0	1.16335	0	2.56885	2.86459	1.59027	-1.52502	-2.42519	0.186185	0.127253	0.999616
26027	tgu-miR-23-5p	miR-23-5p	0	11.464	0	0	0	0	0	0	1.43299	2.71516	-1.5242	-4.13844	0.0567814	0.12746	0.999616
37949	piR-hsa-7033	piR-hsa-7033	0	0	0	0.83282	1.56775	2.90839	3.2489	2.56885	1.39084	1.94979	1.52367	2.97083	7.8399	0.127592	0.999616
7662	pde-MIR952b	MIR952b	1.05254	0.95533	0	0	0.783876	2.32671	1.08297	11.5598	2.22015	1.84868	1.5228	2.81517	7.03804	0.127808	0.999616
24661	rno-mir-105	mir-105	0	0	0	0	2.35163	0	8.66375	0	1.37692	2.48464	1.52258	3.78307	13.7663	0.127864	0.999616
15064	cin-miR-4185-3p	miR-4185-3p	0	0	0	0.83282	0	0	1.08297	14.1286	2.00555	2.31537	1.51426	3.50606	11.3613	0.129961	0.999616
16607	eca-miR-9101-3p	miR-9101-3p	67.3625	23.8832	13.0236	42.4738	11.7581	15.1236	10.8297	10.2754	24.3412	1.06656	-1.51121	-1.61181	0.327189	0.130734	0.999616
22551	osa-MIR159f	MIR159f	2.10508	0	11.3956	0.83282	0	0.581677	1.08297	0	1.99977	1.99028	-1.51111	-3.00754	0.124349	0.130761	0.999616
677	cgr-miR-23a-3p	miR-23a-3p	0	0	0	0	6.271	0	4.33187	0	1.32536	2.48181	1.50688	3.73977	13.3593	0.131843	0.999616
13683	bta-miR-221-3p	miR-221-3p	0	0	0	0	0	12.7969	0	0	1.59961	2.6835	1.50335	4.03426	16.3845	0.132748	0.999616
14835	cgr-mir-328	mir-328	0	1.91066	43.9545	0.83282	0	1.74503	0	5.13769	6.69759	1.85359	-1.50194	-2.78399	0.14519	0.133112	0.999616
24315	ptr-mir-1234	mir-1234	0	0.95533	0	0.83282	2.35163	1.74503	1.08297	8.99096	1.99484	1.8261	1.50086	2.74072	6.68402	0.133393	0.999616
23949	prd-miR-7886-5p	miR-7886-5p	1.05254	3.82132	0	0	0.783876	1.74503	32.489	0	4.98648	1.86731	1.49945	2.79995	6.96414	0.133756	0.999616
20363	lus-MIR399a	MIR399a	0	0	3.25589	0	1.56775	1.16335	6.49781	7.70654	2.52392	1.87264	1.49814	2.80548	6.99089	0.134098	0.999616
18465	gra-MIR8767a	MIR8767a	2.10508	0	0	0	0	0.581677	10.8297	7.70654	2.65287	2.04838	1.49612	3.06462	8.3665	0.134621	0.999616
36918	piR-hsa-31537	piR-hsa-31537	0	0	0	0	0	1.74503	0	8.99096	1.342	2.49639	1.4943	3.73037	13.2725	0.135096	0.999616
25264	sof-MIR408c	MIR408c	0	0	0	0	10.1904	0.581677	0	0	1.34651	2.52748	1.49386	3.77571	13.6963	0.135211	0.999616
1162	isc-miR-153-3p	miR-153-3p	0	0	11.3956	0	0	0	0	0	1.42445	2.73563	-1.4899	-4.07583	0.0592998	0.13625	0.999616
28343	rno-miR-344g-3p	miR-344g-3p	0	0	11.3956	0	0	0	0	0	1.42445	2.73563	-1.4899	-4.07583	0.0592998	0.13625	0.999616
6793	mmu-miR-205-5p	miR-205-5p	0	0	0	10.8267	0	0	0	0	1.35333	2.73159	-1.48872	-4.06656	0.0596819	0.136561	0.999616
14606	cfa-miR-1343-5p	miR-1343-5p	0	0	0	10.8267	0	0	0	0	1.35333	2.73159	-1.48872	-4.06656	0.0596819	0.136561	0.999616
16784	efu-miR-218a-5p	miR-218a-5p	0	0	0	10.8267	0	0	0	0	1.35333	2.73159	-1.48872	-4.06656	0.0596819	0.136561	0.999616
20986	mml-mir-181d	mir-181d	0	0	0	0.83282	2.35163	4.07174	2.16594	1.28442	1.33832	1.97758	1.48318	2.93311	7.63756	0.138027	0.999616
18934	hsa-miR-1343-5p	miR-1343-5p	0	0.95533	0	0.83282	0.783876	1.16335	3.2489	8.99096	1.99691	1.84738	1.48014	2.73439	6.65476	0.138835	0.999616
24867	sha-miR-199a-3p	miR-199a-3p	0	0	0	0	12.542	0	0	0	1.56775	2.70084	1.47748	3.99043	15.8942	0.139548	0.999616
13567	bna-MIR169c	MIR169c	1.05254	14.3299	1.62795	21.6533	0.783876	3.49006	1.08297	3.85327	5.98424	1.41503	-1.47679	-2.0897	0.234929	0.139731	0.999616
23088	pma-miR-497-3p	miR-497-3p	8.42032	2.86599	0	0	0	0.581677	0	0	1.4835	2.29896	-1.47537	-3.39182	0.0952707	0.140112	0.999616
29636	crm-miR-790-2-3p	miR-790-2-3p	0	1.91066	6.51179	1.66564	0	0.581677	0	0	1.33372	2.15726	-1.47463	-3.18116	0.110249	0.140312	0.999616
12968	bfl-mir-2070	mir-2070	0	0	1.62795	0	0.783876	1.16335	4.33187	3.85327	1.47004	1.98334	1.47311	2.92167	7.57721	0.140722	0.999616
40598	piR-hsa-8913	piR-hsa-8913	0	0	0	0	0	0	0	12.8442	1.60553	2.71031	1.47142	3.98801	15.8676	0.141177	0.999616
18908	hsa-miR-1272-3p	miR-1272-3p	1.05254	0	6.51179	2.49846	0	0	1.08297	0	1.39322	2.16016	-1.47093	-3.17745	0.110533	0.14131	0.999616
14796	cgr-miR-218a-5p	miR-218a-5p	0	0	0	0	0	12.2152	0	0	1.5269	2.69862	1.47037	3.96798	15.6488	0.14146	0.999616
23064	pma-miR-4594-3p	miR-4594-3p	2.10508	2.86599	0	0.83282	0	14.5419	21.6594	0	5.25065	1.77371	1.4695	2.60647	6.09012	0.141698	0.999616
3624	bmo-mir-306a	mir-306a	0	0.95533	0	0	3.91938	1.16335	2.16594	2.56885	1.34661	1.97466	1.46851	2.89981	7.4633	0.141965	0.999616
7203	nve-mir-2044	mir-2044	0	0.95533	0	0	2.35163	4.65342	0	3.85327	1.47671	2.08732	1.46595	3.05992	8.33928	0.142661	0.999616
7951	ppy-miR-943-3p	miR-943-3p	0	5.73198	3.25589	0.83282	0	0	1.08297	0	1.36296	2.16689	-1.46458	-3.1736	0.110829	0.143034	0.999616
17754	ggo-miR-345-3p	miR-345-3p	0	10.5086	0	0	0	0	0	0	1.31358	2.74818	-1.46046	-4.01362	0.0619129	0.144163	0.999616
11375	vvi-MIR395n	MIR395n	0	0	0	0.83282	0	0.581677	8.66375	2.56885	1.58089	2.15982	1.45777	3.14853	8.86751	0.144903	0.999616
4931	efu-miR-338-3p	miR-338-3p	10.5254	0	0	0	0	0	0	0	1.31567	2.75097	-1.45683	-4.00769	0.0621677	0.145164	0.999616
22118	oan-miR-1407-3p	miR-1407-3p	1.05254	0.95533	6.51179	3.33128	0	1.16335	0	0	1.62679	1.97828	-1.456	-2.88038	0.135806	0.145392	0.999616
12868	bdi-MIR9486b	MIR9486b	4.21016	6.68731	0	1.66564	4.70325	4.07174	24.9083	16.6975	7.86798	1.34742	1.4555	1.96117	3.89379	0.14553	0.999616
25535	ssc-mir-9862	mir-9862	2.10508	1.91066	1.62795	2.49846	19.5969	3.49006	4.33187	3.85327	4.92678	1.3323	1.45296	1.93578	3.82584	0.146236	0.999616
16375	dwi-miR-92b-3p	miR-92b-3p	8.42032	0	0	2.49846	0	0.581677	0	0	1.43756	2.30539	-1.45202	-3.34747	0.098245	0.146497	0.999616
19384	hsa-miR-6073-5p	miR-6073-5p	1.05254	2.86599	9.76768	0.83282	0	0	2.16594	0	2.08562	1.94308	-1.44945	-2.81639	0.141965	0.147213	0.999616
15686	der-mir-276b	mir-276b	0	28.6599	37.4428	13.3251	0.783876	13.9603	1.08297	1.28442	12.0674	1.51297	-1.4361	-2.17279	0.221782	0.150973	0.999616
39627	piR-hsa-22350	piR-hsa-22350	6.31524	0	1.62795	4.1641	6.271	2.90839	23.8253	15.4131	7.56563	1.38042	1.43101	1.97538	3.93233	0.152428	0.999616
18615	hco-miR-5893-3p	miR-5893-3p	0	0	0	0	0	0	11.9127	0	1.48908	2.72923	1.42659	3.89348	14.8612	0.153699	0.999616
39368	piR-hsa-19384	piR-hsa-19384	0	0	0	0	0	0	11.9127	0	1.48908	2.72923	1.42659	3.89348	14.8612	0.153699	0.999616
33455	piR-hsa-16127	piR-hsa-16127	8.42032	2.86599	6.51179	0.83282	1.56775	1.74503	0	0	2.74296	1.64595	-1.42518	-2.34577	0.196722	0.154105	0.999616
18879	hsa-miR-1182-5p	miR-1182-5p	6.31524	0	4.88384	1.66564	0.783876	0	1.08297	0	1.84145	1.94689	-1.42002	-2.76462	0.147152	0.155603	0.999616
16180	dre-miR-29b-1-5p	miR-29b-1-5p	4.21016	4.77665	6.51179	2.49846	1.56775	0	2.16594	0	2.71634	1.61092	-1.41516	-2.27972	0.205938	0.157021	0.999616
35406	piR-hsa-2474	piR-hsa-2474	12.6305	21.0173	3.25589	5.82974	18.813	12.2152	40.0698	61.6523	21.9355	1.14876	1.41026	1.62005	3.07385	0.158463	0.999616
14934	chi-mir-379	mir-379	0	7.64264	1.62795	2.49846	0	0.581677	0	1.28442	1.70439	1.9774	-1.41016	-2.78846	0.144741	0.158492	0.999616
18017	gma-MIR167k-5p	MIR167k-5p	0	1.91066	1.62795	0	0.783876	4.07174	0	16.6975	3.13646	1.87769	1.40994	2.64743	6.26552	0.158556	0.999616
18286	gma-MIR9763-5p	MIR9763-5p	1.05254	1.91066	6.51179	0	0	0	1.08297	0	1.31974	2.19015	-1.40609	-3.07955	0.118294	0.159696	0.999616
28302	ptc-MIR7821-3p	MIR7821-3p	3.15762	6.68731	3.25589	1.66564	6.271	7.5618	3.2489	34.6794	8.31595	1.27807	1.40451	1.79506	3.4703	0.160167	0.999616
22285	oan-mir-7425	mir-7425	7.36778	2.86599	1.62795	0	0	0.581677	1.08297	0	1.69079	1.98388	-1.40425	-2.78586	0.145002	0.160245	0.999616
21058	mml-mir-661	mir-661	0	1.91066	9.76768	0.83282	0	0.581677	0	1.28442	1.79716	2.00433	-1.40165	-2.80937	0.142658	0.161019	0.999616
4666	eca-miR-493b-5p	miR-493b-5p	0	0	0	0	0	11.0519	0	0	1.38148	2.73384	1.39928	3.82542	14.1764	0.161728	0.999616
26019	tgu-miR-181b-1-5p	miR-181b-1-5p	0	0	0	0	0	0	0	11.5598	1.44498	2.74537	1.39653	3.83399	14.2608	0.162556	0.999616
27817	mmu-miR-1931-5p	miR-1931-5p	6.31524	0.95533	0	0	2.35163	0	25.9912	12.8442	6.05721	1.7773	1.39367	2.47697	5.56726	0.163419	0.999616
30906	piR-hsa-11080	piR-hsa-11080	16.8406	15.2853	22.7912	65.7928	50.168	57.0044	10.8297	272.298	63.8762	1.21251	1.39232	1.68821	3.22256	0.163825	0.999616
20708	mdo-mir-7386k	mir-7386k	4.21016	0.95533	0	0	8.62263	0.581677	9.74671	6.42211	3.81733	1.62956	1.38931	2.26397	4.8031	0.164738	0.999616
21458	mne-mir-181b	mir-181b	1.05254	0	0	0	3.1355	0	1.08297	6.42211	1.46164	2.15461	1.38917	2.99313	7.96197	0.16478	0.999616
8175	rgl-MIR5576	MIR5576	0	0.95533	0	0	0	0	9.74671	2.56885	1.65886	2.31433	1.38716	3.21035	9.25578	0.165392	0.999616
13784	bta-miR-2389-5p	miR-2389-5p	1.05254	0	0	0	3.1355	2.32671	4.33187	0	1.35583	2.10332	1.38446	2.91198	7.5265	0.166216	0.999616
4040	cfa-miR-32-5p	miR-32-5p	0	0	0	0	10.9743	0	0	0	1.37178	2.74727	1.38275	3.79879	13.9171	0.166742	0.999616
21702	mtr-MIR2659d	MIR2659d	0	0.95533	0	0	14.1098	0	0	0	1.88314	2.48911	1.38195	3.43982	10.8515	0.166989	0.999616
10104	hco-mir-5975	mir-5975	1.05254	2.86599	1.62795	0.83282	3.1355	1.16335	11.9127	8.99096	3.94772	1.42384	1.37931	1.96393	3.90122	0.167798	0.999616
18370	gra-MIR8656-5p	MIR8656-5p	3.15762	4.77665	21.1633	0.83282	4.70325	0.581677	0	1.28442	4.56247	1.55044	-1.37796	-2.13645	0.227439	0.168215	0.999616
4186	cgr-miR-185-3p	miR-185-3p	6.31524	8.59797	4.88384	3.33128	0	2.32671	1.08297	2.56885	3.63836	1.42926	-1.37627	-1.96705	0.255776	0.168739	0.999616
40844	14q(I-7)	I-7)	1.05254	17.1959	0	0	0	0.581677	1.08297	1.28442	2.64969	1.96996	-1.37554	-2.70976	0.152855	0.168964	0.999616
27655	hsa-mir-7977	mir-7977	0	0	1.62795	0	0.783876	1.16335	3.2489	3.85327	1.33467	2.00835	1.37257	2.7566	6.75803	0.169886	0.999616
37700	piR-hsa-5925	piR-hsa-5925	0	0	1.62795	0	1.56775	0.581677	4.33187	2.56885	1.33476	2.01545	1.37001	2.76119	6.77954	0.170684	0.999616
11471	aae-mir-375	mir-375	13.683	12.4193	6.51179	0	4.70325	0	1.08297	1.28442	4.96059	1.61334	-1.36535	-2.20277	0.217221	0.172144	0.999616
15093	cin-mir-367	mir-367	0	0	0	0.83282	0.783876	0	2.16594	7.70654	1.43615	2.18551	1.36471	2.98258	7.90398	0.172345	0.999616
24807	sbi-MIR399j	MIR399j	7.36778	2.86599	0	0.83282	0	0.581677	0	1.28442	1.61659	1.98867	-1.35831	-2.70124	0.153761	0.174364	0.999616
12721	bdi-MIR2275b	MIR2275b	1.05254	3.82132	1.62795	3.33128	0.783876	0.581677	0	0	1.39983	1.88637	-1.35686	-2.55954	0.169629	0.174826	0.999616
7092	mtr-MIR2655i-3p	MIR2655i-3p	29.4711	75.471	8.13973	15.8236	36.8422	19.1954	254.498	92.4784	66.4899	1.21165	1.35315	1.63955	3.11568	0.176008	0.999616
13367	bmo-miR-3375-3p	miR-3375-3p	3.15762	12.4193	0	4.1641	0.783876	0.581677	2.16594	1.28442	3.06961	1.56034	-1.34911	-2.10507	0.232439	0.177301	0.999616
13054	bma-miR-5848-3p	miR-5848-3p	1.05254	0	0	0	5.48713	0.581677	0	3.85327	1.37183	2.16364	1.34719	2.91483	7.54138	0.177921	0.999616
32508	piR-hsa-12666	piR-hsa-12666	1.05254	6.68731	1.62795	0.83282	0	0.581677	0	1.28442	1.50834	1.91837	-1.34329	-2.57693	0.167597	0.179178	0.999616
23794	ppy-miR-602-5p	miR-602-5p	4.21016	0	1.62795	0	6.271	1.16335	6.49781	11.5598	3.91626	1.59989	1.34256	2.14795	4.43197	0.179414	0.999616
4630	dvi-mir-9541	mir-9541	0	0	0	1.66564	0	5.2351	4.33187	3.85327	1.88573	2.04173	1.34147	2.73892	6.67569	0.179769	0.999616
26313	xtr-miR-34a-5p	miR-34a-5p	0	0	0	0.83282	13.3259	0	0	0	1.76984	2.50366	1.34117	3.35784	10.252	0.179865	0.999616
5390	gga-mir-1694	mir-1694	4.21016	0.95533	1.62795	0.83282	4.70325	5.81677	5.41484	10.2754	4.22956	1.33745	1.333	1.78283	3.441	0.182531	0.999616
24885	sha-mir-221	mir-221	0	0	8.13973	1.66564	0.783876	0	0	0	1.32366	2.35936	-1.32665	-3.13005	0.114225	0.184623	0.999616
7502	osa-MIR2118i	MIR2118i	0	1.91066	0	0	0	1.74503	8.66375	3.85327	2.02159	2.05031	1.32545	2.71758	6.5777	0.185022	0.999616
14093	bta-mir-764	mir-764	1.05254	0	0	0	0	2.32671	3.2489	3.85327	1.31018	2.13796	1.32284	2.82817	7.10173	0.18589	0.999616
16429	ebv-mir-BART5	mir-BART5	0	0.95533	17.9074	10.8267	1.56775	1.16335	3.2489	1.28442	4.61923	1.53653	-1.31935	-2.02722	0.245327	0.187053	0.999616
32049	piR-hsa-11013	piR-hsa-11013	0	1.91066	0	0	3.91938	6.98013	0	2.56885	1.92238	2.02999	1.31736	2.67423	6.383	0.187718	0.999616
35315	piR-hsa-24413	piR-hsa-24413	3.15762	4.77665	1.62795	2.49846	0	1.16335	0	1.28442	1.81356	1.76158	-1.31586	-2.318	0.200546	0.188221	0.999616
13729	bta-miR-2303-5p	miR-2303-5p	3.15762	10.5086	0	3.33128	14.1098	5.81677	28.1572	8.99096	9.25902	1.30328	1.3146	1.71328	3.27906	0.188645	0.999616
13147	bmo-miR-2733c-3p	miR-2733c-3p	12.6305	7.64264	9.76768	8.3282	4.70325	4.65342	2.16594	0	6.23645	1.28173	-1.31455	-1.6849	0.311024	0.18866	0.999616
17922	ghr-MIR7511-5p	MIR7511-5p	7.36778	2.86599	1.62795	4.1641	1.56775	1.16335	1.08297	0	2.47999	1.53963	-1.31228	-2.02043	0.246484	0.189424	0.999616
14017	bta-mir-2398	mir-2398	0	2.86599	6.51179	0	0	0	0	1.28442	1.33277	2.34482	-1.31045	-3.07277	0.118852	0.190044	0.999616
37445	piR-hsa-4840	piR-hsa-4840	2.10508	0.95533	8.13973	0	0	0.581677	0	1.28442	1.63328	2.02096	-1.30947	-2.64639	0.159719	0.190375	0.999616
13675	bta-miR-200a-3p	miR-200a-3p	0	0.95533	0	0	0	0	12.9956	0	1.74387	2.51763	1.30932	3.29638	9.82446	0.190426	0.999616
29038	hsa-mir-218-2	mir-218-2	1.05254	0.95533	0	0.83282	3.91938	2.32671	1.08297	6.42211	2.07398	1.65907	1.30804	2.17012	4.50061	0.190861	0.999616
34109	piR-hsa-1893	piR-hsa-1893	0	0.95533	0	0	1.56775	0	5.41484	2.56885	1.31335	2.17082	1.30783	2.83905	7.1555	0.190932	0.999616
39258	piR-hsa-18135	piR-hsa-18135	0	0.95533	1.62795	0	1.56775	0	5.41484	6.42211	1.9985	1.95696	1.30761	2.55894	5.89274	0.191006	0.999616
15447	crm-mir-790-1	mir-790-1	5.2627	2.86599	8.13973	0.83282	1.56775	1.16335	0	1.28442	2.6396	1.55993	-1.3033	-2.03307	0.244335	0.192471	0.999616
17480	gga-miR-6656-3p	miR-6656-3p	5.2627	1.91066	3.25589	0	0	0.581677	1.08297	0	1.51174	1.99377	-1.29507	-2.58207	0.167001	0.195297	0.999616
289	bta-miR-1246-5p	miR-1246-5p	1.05254	10.5086	14.6515	3.33128	3.91938	1.16335	2.16594	1.28442	4.75963	1.36437	-1.29417	-1.76574	0.294077	0.195605	0.999616
26834	cbr-miR-55-3p	miR-55-3p	2.10508	0	0	0	6.271	0	0	10.2754	2.33143	2.20869	1.29394	2.85791	7.24964	0.195686	0.999616
21286	mmu-mir-1905	mir-1905	3.15762	0.95533	0	5.82974	0.783876	0.581677	0	0	1.41353	2.01041	-1.29141	-2.59626	0.165367	0.196563	0.999616
15478	csi-MIR3947	MIR3947	0	1.91066	0	0.83282	3.91938	0	5.41484	6.42211	2.31248	1.85703	1.28981	2.3952	5.26051	0.197118	0.999616
21929	nta-MIR399a	MIR399a	3.15762	3.82132	3.25589	0	0	0.581677	1.08297	0	1.48743	1.98527	-1.28813	-2.55729	0.169894	0.1977	0.999616
11693	age-miR-222-3p	miR-222-3p	0	0	11.3956	6.66256	0	0.581677	0	2.56885	2.65109	2.01477	-1.28715	-2.59331	0.165706	0.198043	0.999616
22783	osa-MIR5490	MIR5490	0	3.82132	8.13973	3.33128	0	0.581677	0	2.56885	2.30536	1.84788	-1.28121	-2.36753	0.193777	0.200119	0.999616
21408	mmu-mir-7038	mir-7038	0	0	0	0.83282	0.783876	0	7.58078	1.28442	1.31024	2.2308	1.28021	2.8559	7.23954	0.20047	0.999616
3539	bfl-miR-4868c-3p	miR-4868c-3p	0	1.91066	8.13973	3.33128	0	1.16335	0	1.28442	1.97868	1.89641	-1.27955	-2.42655	0.18601	0.200703	0.999616
21781	mtr-MIR5247	MIR5247	1.05254	8.59797	1.62795	0	0.783876	0	1.08297	0	1.64316	2.03275	-1.27791	-2.59768	0.165204	0.20128	0.999616
519	bta-mir-671	mir-671	4.21016	1.91066	6.51179	0.83282	2.35163	0	0	0	1.97713	1.88796	-1.27746	-2.41178	0.187923	0.201441	0.999616
33651	piR-hsa-16940	piR-hsa-16940	0	0	0	0.83282	0	4.65342	5.41484	0	1.36263	2.31385	1.2758	2.952	7.7382	0.202028	0.999616
20911	mml-miR-603-3p	miR-603-3p	2.10508	0	1.62795	2.49846	10.1904	5.2351	1.08297	6.42211	3.64526	1.47731	1.27487	1.88338	3.68937	0.202356	0.999616
18643	hco-miR-5923-3p	miR-5923-3p	1.05254	0.95533	8.13973	4.1641	0	2.32671	0	0	2.0798	1.88684	-1.27409	-2.40401	0.188938	0.20263	0.999616
26452	aca-miR-5454-3p	miR-5454-3p	4.21016	1.91066	0	0	7.05488	4.65342	3.2489	8.99096	3.75862	1.52116	1.27259	1.93582	3.82596	0.203163	0.999616
20467	mdm-MIR393a-3p	MIR393a-3p	25.2609	7.64264	13.0236	31.6472	3.1355	2.32671	2.16594	19.2663	13.0586	1.22934	-1.27168	-1.56333	0.338369	0.203485	0.999616
6636	mdo-miR-7398r-3p	miR-7398r-3p	0	1.91066	0	0	2.35163	4.07174	0	6.42211	1.84452	2.03593	1.26727	2.58007	5.97969	0.20506	0.999616
21586	mtr-MIR2592af	MIR2592af	0	2.86599	0	0	0	2.90839	17.3275	0	2.88773	2.16605	1.26696	2.74429	6.70062	0.20517	0.999616
18477	gra-MIR8776c-5p	MIR8776c-5p	1.05254	10.5086	0	0.83282	2.35163	1.74503	31.4061	12.8442	7.59262	1.51918	1.26678	1.92448	3.79599	0.205233	0.999616
40641	piR-hsa-9748	piR-hsa-9748	4.21016	9.5533	4.88384	4.1641	13.3259	13.9603	7.58078	26.9729	10.5814	1.1297	1.26578	1.42995	2.69438	0.205592	0.999616
24274	ptr-miR-200c-5p	miR-200c-5p	0	0	8.13973	3.33128	0	0.581677	0	1.28442	1.66714	2.13475	-1.26467	-2.69975	0.15392	0.205991	0.999616
17706	gga-mir-6668	mir-6668	1.05254	2.86599	1.62795	6.66256	0	0.581677	1.08297	1.28442	1.89476	1.70938	-1.26401	-2.16068	0.223651	0.206227	0.999616
18574	hcmv-miR-UL59-5p	-miR-UL59-5p	0	1.91066	0	3.33128	3.91938	6.39845	3.2489	7.70654	3.3144	1.53003	1.26027	1.92825	3.80594	0.20757	0.999616
28933	eca-miR-1302e-6-3p	miR-1302e-6-3p	3.15762	15.2853	1.62795	4.99692	9.40651	2.32671	60.6462	8.99096	13.3048	1.33167	1.25939	1.67708	3.19781	0.20789	0.999616
17219	gga-miR-1454-3p	miR-1454-3p	4.21016	4.77665	1.62795	0	5.48713	2.32671	11.9127	16.6975	5.87984	1.39774	1.25914	1.75995	3.38686	0.20798	0.999616
34802	piR-hsa-22118	piR-hsa-22118	1.05254	1.91066	0	0.83282	6.271	1.16335	2.16594	6.42211	2.4773	1.58561	1.25709	1.99324	3.98131	0.208723	0.999616
40607	piR-hsa-9039	piR-hsa-9039	0	0	1.62795	9.99384	0	1.16335	0	0	1.59814	2.32716	-1.25357	-2.91726	0.132378	0.209998	0.999616
19122	hsa-miR-4420-5p	miR-4420-5p	6.31524	4.77665	3.25589	2.49846	9.40651	6.39845	15.1616	15.4131	7.90323	1.15704	1.25272	1.44945	2.73105	0.210306	0.999616
18839	hme-mir-263a	mir-263a	1.05254	0.95533	11.3956	0.83282	0	33.1556	27.0742	0	9.30827	1.71668	1.24546	2.13806	4.4017	0.212962	0.999616
27391	ggo-mir-493	mir-493	1.05254	0	17.9074	0	2.35163	0.581677	0	0	2.73666	2.07307	-1.24466	-2.58026	0.16721	0.213257	0.999616
29583	cbr-miR-45-2-5p	miR-45-2-5p	5.2627	5.73198	1.62795	3.33128	6.271	2.90839	22.7423	15.4131	7.91109	1.23605	1.24394	1.53757	2.90306	0.21352	0.999616
23701	ppt-MIR477f-3p	MIR477f-3p	1.05254	4.77665	4.88384	0	0.783876	0	1.08297	0	1.57248	2.00581	-1.24204	-2.4913	0.177846	0.214222	0.999616
12224	asu-miR-5350a-5p	miR-5350a-5p	3.15762	4.77665	3.25589	6.66256	0.783876	0.581677	0	3.85327	2.88394	1.51701	-1.23738	-1.87712	0.272227	0.215946	0.999616
20817	mes-MIR477i	MIR477i	4.21016	9.5533	3.25589	2.49846	0.783876	1.74503	2.16594	1.28442	3.18713	1.38842	-1.23687	-1.71729	0.304119	0.216135	0.999616
2237	mmu-mir-331	mir-331	4.21016	5.73198	0	0.83282	1.56775	0	0	0	1.54284	2.10765	-1.23403	-2.60091	0.164835	0.217191	0.999616
16063	dps-mir-2540	mir-2540	0	0.95533	1.62795	1.66564	3.1355	0.581677	5.41484	7.70654	2.63593	1.59983	1.23378	1.97384	3.92813	0.217284	0.999616
1023	ggo-mir-187	mir-187	1.05254	0	1.62795	0	0.783876	0	2.16594	10.2754	1.98821	2.0134	1.23169	2.47989	5.57854	0.218065	0.999616
36113	piR-hsa-28035	piR-hsa-28035	1.05254	0	0	0.83282	3.91938	1.16335	0	6.42211	1.67378	1.96858	1.22961	2.42058	5.35386	0.218843	0.999616
27880	mse-mir-190	mir-190	2.10508	1.91066	0	0	0.783876	2.90839	12.9956	1.28442	2.74851	1.72257	1.22782	2.11501	4.33192	0.219513	0.999616
25905	tca-mir-3874	mir-3874	2.10508	0.95533	9.76768	2.49846	0.783876	2.32671	0	0	2.30464	1.71875	-1.22706	-2.109	0.231807	0.219801	0.999616
22	aae-miR-92a-3p	miR-92a-3p	16.8406	10.5086	27.6751	25.8174	4.70325	12.2152	9.74671	5.13769	14.0806	1.08759	-1.22686	-1.33433	0.396577	0.219874	0.999616
6100	hsa-miR-5095-3p	miR-5095-3p	6.31524	0.95533	14.6515	8.3282	14.1098	21.5221	12.9956	32.1106	13.8735	1.17027	1.22579	1.43451	2.7029	0.220278	0.999616
1163	isc-miR-96-5p	miR-96-5p	1.05254	1.91066	0	0	6.271	3.49006	1.08297	2.56885	2.04701	1.7398	1.22536	2.13189	4.38291	0.220439	0.999616
30913	piR-hsa-1207	piR-hsa-1207	2.10508	0	1.62795	30437.9	1.56775	40751.7	114012	48880	29260.8	2.23852	1.22489	2.74195	6.68973	0.220616	0.999616
15438	crm-mir-75	mir-75	3.15762	6.68731	3.25589	0.83282	0	0	2.16594	1.28442	2.173	1.75029	-1.22347	-2.14143	0.226655	0.221153	0.999616
27957	nve-mir-2024b	mir-2024b	0	0	1.62795	0	0	0	1.08297	8.99096	1.46273	2.37303	1.22195	2.89971	7.46278	0.221728	0.999616
32017	piR-hsa-10884	piR-hsa-10884	0	1.91066	1.62795	0	4.70325	0.581677	4.33187	5.13769	2.28664	1.73307	1.21811	2.11107	4.3201	0.223183	0.999616
4575	dre-miR-214-5p	miR-214-5p	0	0	0	0.83282	0	0	0	11.5598	1.54908	2.5541	1.21668	3.10752	8.61897	0.223726	0.999616
36790	piR-hsa-30995	piR-hsa-30995	2.10508	0	0	0	0.783876	3.49006	1.08297	6.42211	1.73551	1.95307	1.2162	2.37533	5.18856	0.223908	0.999616
26589	ath-MIR5020b-3p	MIR5020b-3p	4.21016	7.64264	0	3.33128	5.48713	4.07174	24.9083	12.8442	7.81193	1.31865	1.21177	1.5979	3.02702	0.225602	0.999616
12569	atr-MIR8595-5p	MIR8595-5p	4.21016	7.64264	0	0	1.56775	0	0	0	1.67757	2.2559	-1.21129	-2.73255	0.15046	0.225785	0.999616
17454	gga-miR-6600-3p	miR-6600-3p	1.05254	0	8.13973	0.83282	0.783876	0.581677	0	0	1.42383	2.078	-1.20768	-2.50956	0.175609	0.227172	0.999616
11926	ame-miR-3769-3p	miR-3769-3p	5.2627	1.91066	0	3.33128	8.62263	5.81677	12.9956	5.13769	5.38467	1.31745	1.20715	1.59037	3.01126	0.227373	0.999616
17710	gga-mir-6697	mir-6697	1.05254	22.9279	3.25589	0	1.56775	1.16335	2.16594	2.56885	4.33778	1.57599	-1.2046	-1.89845	0.268232	0.228356	0.999616
29346	ssa-mir-724-2	mir-724-2	4.21016	4.77665	6.51179	4.99692	8.62263	2.90839	27.0742	16.6975	9.47478	1.18715	1.20332	1.42852	2.6917	0.228854	0.999616
24194	ptc-MIR6440b	MIR6440b	1.05254	4.77665	6.51179	0.83282	0	2.32671	0	0	1.93756	1.90181	-1.20281	-2.28751	0.204829	0.229051	0.999616
20352	lus-MIR390a	MIR390a	4.21016	4.77665	8.13973	3.33128	1.56775	2.32671	2.16594	0	3.31478	1.40653	-1.1998	-1.68755	0.310454	0.230218	0.999616
19725	hsa-mir-412	mir-412	1.05254	1.91066	0	0.83282	3.91938	2.32671	2.16594	6.42211	2.32877	1.5667	1.19936	1.87904	3.6783	0.230387	0.999616
17268	gga-miR-1619-3p	miR-1619-3p	1.05254	3.82132	0	0.83282	0.783876	0.581677	24.9083	0	3.99756	1.79265	1.1992	2.14975	4.4375	0.230449	0.999616
24636	rno-miR-6324-5p	miR-6324-5p	2.10508	7.64264	8.13973	6.66256	3.91938	2.32671	1.08297	0	3.98488	1.40115	-1.19883	-1.67974	0.312138	0.230592	0.999616
12643	bbe-mir-124	mir-124	1.05254	0	0	0.83282	1.56775	2.32671	2.16594	3.85327	1.47488	1.84428	1.19798	2.2094	4.62484	0.230926	0.999616
22682	osa-MIR2873a-3p	MIR2873a-3p	0	11.464	0	1.66564	0.783876	0.581677	0	1.28442	1.97245	1.96689	-1.19675	-2.35388	0.19562	0.231405	0.999616
17696	gga-mir-6589	mir-6589	0	2.86599	8.13973	4.99692	0	0.581677	2.16594	1.28442	2.50433	1.7039	-1.19624	-2.03827	0.243456	0.231604	0.999616
5094	efu-mir-9298	mir-9298	4.21016	4.77665	8.13973	3.33128	3.1355	1.74503	1.08297	0	3.30267	1.42308	-1.19394	-1.69907	0.307984	0.232502	0.999616
25038	sly-MIR5302b	MIR5302b	0	3.82132	6.51179	0	0.783876	0.581677	0	0	1.46233	2.16964	-1.19003	-2.58194	0.167016	0.234034	0.999616
30019	mmu-mir-6967-2	mir-6967-2	1.05254	6.68731	0	0	7.83876	2.90839	9.74671	7.70654	4.49253	1.53184	1.18754	1.81912	3.52866	0.235015	0.999616
38480	piR-hsa-956	piR-hsa-956	3.15762	6.68731	8.13973	0	1.56775	1.74503	1.08297	0	2.79755	1.64062	-1.18555	-1.94504	0.259707	0.235799	0.999616
37838	piR-hsa-6556	piR-hsa-6556	10.5254	2.86599	6.51179	2.49846	36.0583	9.88851	7.58078	6.42211	10.2939	1.21407	1.18456	1.43813	2.70969	0.236193	0.999616
10483	mes-MIR828b	MIR828b	2.10508	3.82132	0	0.83282	2.35163	0.581677	18.4105	3.85327	3.99453	1.55428	1.18394	1.84018	3.58055	0.236435	0.999616
8181	rlcv-miR-rL1-2-5p	-miR-rL1-2-5p	2.10508	0	0	0.83282	8.62263	1.16335	4.33187	0	2.13197	1.87814	1.1791	2.21452	4.64126	0.238358	0.999616
13221	bmo-miR-2810-5p	miR-2810-5p	3.15762	34.3919	3.25589	5.82974	14.1098	6.98013	82.3056	30.8261	22.6071	1.28265	1.17885	1.51205	2.85215	0.238457	0.999616
17580	gga-mir-1625	mir-1625	2.10508	8.59797	0	0.83282	0	1.16335	1.08297	0	1.72277	1.9567	-1.17851	-2.30598	0.202223	0.238594	0.999616
30287	tgu-miR-2980-2-3p	miR-2980-2-3p	1.05254	0	0	0.83282	2.35163	1.74503	6.49781	0	1.55998	1.97047	1.17702	2.31929	4.99085	0.239187	0.999616
17403	gga-miR-23b-5p	miR-23b-5p	5.2627	0	3.25589	9.16102	14.1098	12.2152	14.0786	10.2754	8.54482	1.27994	1.17687	1.50632	2.84084	0.239248	0.999616
24027	prd-mir-7968	mir-7968	1.05254	0	1.62795	0.83282	1.56775	2.32671	6.49781	2.56885	2.0593	1.65298	1.17619	1.94422	3.84831	0.239518	0.999616
27213	dwi-miR-92a-5p	miR-92a-5p	36.8389	1.91066	16.2795	26.6503	47.0325	15.1236	80.1396	70.6432	36.8273	1.17229	1.17613	1.37876	2.60045	0.239542	0.999616
6191	hsa-miR-7703-3p	miR-7703-3p	0	0.95533	4.88384	3.33128	0	0.581677	1.08297	0	1.35439	2.03412	-1.17334	-2.38672	0.191216	0.240658	0.999616
10859	pma-miR-25b-5p	miR-25b-5p	0	2.86599	3.25589	0.83282	25.084	1.16335	0	1.28442	4.31081	1.73459	1.17077	2.03081	4.08633	0.241692	0.999616
33602	piR-hsa-16715	piR-hsa-16715	0	6.68731	3.25589	0	0.783876	0.581677	0	0	1.41359	2.18505	-1.16998	-2.55647	0.169991	0.242007	0.999616
1287	mmu-miR-1927-3p	miR-1927-3p	5.2627	2.86599	3.25589	5.82974	9.40651	10.4702	9.74671	14.1286	7.6208	1.138	1.16977	1.3312	2.51612	0.242092	0.999616
15421	crm-mir-355	mir-355	3.15762	0.95533	0	0.83282	3.1355	4.07174	7.58078	2.56885	2.78783	1.5094	1.16972	1.76558	3.40011	0.242112	0.999616
8653	tcc-MIR156c	MIR156c	2.10508	10.5086	0	1.66564	0.783876	0.581677	2.16594	0	2.22635	1.74843	-1.16969	-2.04512	0.242302	0.242126	0.999616
10763	ola-miR-146a-5p	miR-146a-5p	0	0.95533	0	0.83282	2.35163	1.74503	0	6.42211	1.53837	1.98463	1.16925	2.32053	4.99517	0.242301	0.999616
24365	ptr-mir-6127	mir-6127	2.10508	0	0	0.83282	0	0.581677	11.9127	2.56885	2.25013	1.94889	1.16907	2.27839	4.85137	0.242375	0.999616
22463	ola-miR-1388-3p	miR-1388-3p	0	5.73198	0	4.1641	0	1.16335	0	0	1.38243	2.30546	-1.1678	-2.69231	0.154715	0.242889	0.999616
25958	tcc-MIR395a	MIR395a	8.42032	24.8386	39.0707	14.1579	5.48713	7.5618	9.74671	12.8442	15.2659	1.09723	-1.16735	-1.28085	0.411552	0.243071	0.999616
31083	piR-hsa-28904	piR-hsa-28904	10.5254	2.86599	6.51179	2.49846	36.8422	9.88851	7.58078	5.13769	10.2313	1.22586	1.16364	1.42646	2.68786	0.244572	0.999616
38406	piR-hsa-924	piR-hsa-924	0	0	0	2.49846	0	2.32671	0	14.1286	2.36923	2.203	1.15995	2.55537	5.87817	0.24607	0.999616
158	aca-miR-367-3p	miR-367-3p	7.36778	1.91066	0	0	7.83876	12.7969	6.49781	3.85327	5.03315	1.49784	1.15601	1.73151	3.32075	0.247679	0.999616
3387	bbe-miR-9-5p	miR-9-5p	8.42032	9.5533	4.88384	6.66256	7.83876	0.581677	0	0	4.74256	1.53292	-1.15595	-1.77197	0.292809	0.247704	0.999616
17369	gga-miR-1794-3p	miR-1794-3p	3.15762	5.73198	0	1.66564	0	0	2.16594	0	1.59015	2.07911	-1.15378	-2.39884	0.189617	0.24859	0.999616
13	aae-miR-263a-5p	miR-263a-5p	0	0	0	3.33128	3.1355	5.81677	3.2489	2.56885	2.26266	1.77283	1.14954	2.03794	4.10659	0.250332	0.999616
32866	piR-hsa-13828	piR-hsa-13828	1.05254	0.95533	3.25589	0	1.56775	2.32671	4.33187	8.99096	2.81013	1.56441	1.14944	1.79819	3.47784	0.250377	0.999616
18877	hsa-miR-1181-3p	miR-1181-3p	2.10508	2.86599	3.25589	1.66564	0	1.74503	0	0	1.4547	1.93759	-1.14889	-2.22606	0.213741	0.250603	0.999616
31032	piR-hsa-29114	piR-hsa-29114	4.21016	4.77665	9.76768	7.49538	1.56775	2.32671	4.33187	1.28442	4.47008	1.26863	-1.1488	-1.4574	0.364148	0.250637	0.999616
8695	tgu-miR-2989-1-3p	miR-2989-1-3p	0	1.91066	0	0	1.56775	1.16335	0	8.99096	1.70409	2.11181	1.14717	2.42261	5.36138	0.251311	0.999616
1730	mmu-miR-669d-2-3p	miR-669d-2-3p	4.21016	8.59797	8.13973	8.3282	10.1904	4.07174	6.49781	57.799	13.4794	1.2321	1.14619	1.41222	2.66146	0.251717	0.999616
14840	cgr-mir-503	mir-503	12.6305	12.4193	6.51179	6.66256	3.1355	4.07174	5.41484	2.56885	6.67688	1.16246	-1.14615	-1.33235	0.39712	0.251732	0.999616
12487	ath-MIR842-5p	MIR842-5p	5.2627	0.95533	14.6515	2.49846	0.783876	0.581677	5.41484	0	3.76855	1.5554	-1.14599	-1.78247	0.290685	0.251799	0.999616
15278	cqu-miR-133-5p	miR-133-5p	0	7.64264	0	4.99692	14.8936	10.4702	2.16594	14.1286	6.78725	1.46863	1.1447	1.68115	3.20684	0.252332	0.999616
21581	mtr-MIR2590i	MIR2590i	0	2.86599	0	3.33128	2.35163	5.2351	14.0786	1.28442	3.64338	1.58644	1.14461	1.81586	3.52069	0.252371	0.999616
27568	hsa-miR-4471-3p	miR-4471-3p	10.5254	7.64264	9.76768	11.6595	2.35163	5.2351	3.2489	5.13769	6.94606	1.14663	-1.14362	-1.31132	0.402952	0.252779	0.999616
31142	piR-hsa-1339	piR-hsa-1339	1.05254	0.95533	6.51179	1.66564	0	0	2.16594	0	1.5439	2.00488	-1.1434	-2.29238	0.204139	0.252872	0.999616
20837	mghv-mir-M1-5	#NAME?	3.15762	0.95533	4.88384	0	0	0.581677	0	1.28442	1.35786	2.04758	-1.14334	-2.34109	0.197361	0.252896	0.999616
32514	piR-hsa-12680	piR-hsa-12680	2.10508	8.59797	6.51179	3.33128	0	2.90839	2.16594	1.28442	3.36311	1.45992	-1.14287	-1.6685	0.31458	0.253093	0.999616
21701	mtr-MIR2659b	MIR2659b	9.47286	0	0	1.66564	0	0	1.08297	1.28442	1.68824	2.1506	-1.14205	-2.4561	0.182239	0.253433	0.999616
14920	chi-mir-328	mir-328	1.05254	1.91066	0	0	0	1.74503	9.74671	2.56885	2.12797	1.90155	1.1418	2.1712	4.50398	0.253535	0.999616
19206	hsa-miR-4661-5p	miR-4661-5p	0	3.82132	1.62795	0	7.05488	0.581677	8.66375	3.85327	3.20035	1.6574	1.14156	1.89202	3.71155	0.253635	0.999616
35466	piR-hsa-24994	piR-hsa-24994	4.21016	0.95533	9.76768	1.66564	0	3.49006	0	0	2.51111	1.8149	-1.14124	-2.07124	0.237955	0.25377	0.999616
194	age-miR-196-3p	miR-196-3p	0	0	4.88384	0.83282	0	9.88851	7.58078	3.85327	3.3799	1.78033	1.13878	2.02741	4.07674	0.254793	0.999616
20090	hvu-MIR6189	MIR6189	4.21016	0	0	0	2.35163	4.07174	9.74671	1.28442	2.70808	1.78672	1.13857	2.03431	4.09628	0.254881	0.999616
14209	cbr-miR-268-5p	miR-268-5p	0	0.95533	1.62795	0	0	5.2351	6.49781	0	1.78952	2.11202	1.13797	2.40341	5.29053	0.255132	0.999616
4294	cln-MIR166	MIR166	1.05254	0	1.62795	0	1.56775	0	2.16594	7.70654	1.76509	1.99734	1.13776	2.27248	4.83154	0.255222	0.999616
24111	ptc-MIR169y-3p	MIR169y-3p	0	5.73198	3.25589	1.66564	0	0	0	2.56885	1.65279	2.10491	-1.13217	-2.38311	0.191695	0.257564	0.999616
16195	dre-miR-7147-5p	miR-7147-5p	1.05254	0	1.62795	8.3282	1.56775	0.581677	0	0	1.64476	1.99467	-1.13182	-2.25759	0.20912	0.257712	0.999616
29905	hsa-miR-548o-2-3p	miR-548o-2-3p	1.05254	0.95533	0	1.66564	2.35163	1.74503	2.16594	7.70654	2.20533	1.60097	1.13091	1.81056	3.50778	0.258093	0.999616
37355	piR-hsa-4425	piR-hsa-4425	0	0	0	1.66564	0	1.16335	3.2489	6.42211	1.5625	2.12445	1.13028	2.40121	5.28246	0.25836	0.999616
22580	osa-MIR169q	MIR169q	1.05254	0.95533	3.25589	7.49538	0	1.16335	1.08297	1.28442	2.03624	1.67467	-1.12966	-1.89181	0.269469	0.25862	0.999616
32419	piR-hsa-12384	piR-hsa-12384	2.10508	6.68731	1.62795	4.1641	4.70325	5.81677	11.9127	16.6975	6.71433	1.2259	1.12924	1.38433	2.61051	0.258796	0.999616
29538	bta-mir-365-2	mir-365-2	5.2627	19.1066	3.25589	6.66256	0	4.07174	6.49781	0	5.60716	1.50455	-1.12749	-1.69636	0.308564	0.259536	0.999616
16829	efu-miR-9189a-5p	miR-9189a-5p	6.31524	1.91066	4.88384	0	0	1.74503	1.08297	0	1.99222	1.8736	-1.12693	-2.11141	0.231421	0.259773	0.999616
14342	ccr-let-7i	let-7i	10.5254	6.68731	1.62795	4.1641	0.783876	2.32671	4.33187	0	3.8059	1.44425	-1.12692	-1.62756	0.323634	0.259775	0.999616
11515	aca-miR-454-5p	miR-454-5p	5.2627	1.91066	4.88384	1.66564	1.56775	1.16335	1.08297	0	2.19211	1.56517	-1.12677	-1.76358	0.294516	0.259839	0.999616
25644	stu-MIR6026	MIR6026	4.21016	2.86599	0	0	4.70325	4.65342	11.9127	2.56885	3.86429	1.52895	1.12662	1.72254	3.30018	0.259902	0.999616
11586	aca-mir-148b	mir-148b	0	0.95533	1.62795	0.83282	3.1355	5.2351	2.16594	1.28442	1.90463	1.67116	1.12502	1.88009	3.68098	0.260579	0.999616
9377	cel-mir-231	mir-231	2.10508	5.73198	3.25589	2.49846	5.48713	5.81677	16.2445	7.70654	6.1058	1.21586	1.12254	1.36485	2.57549	0.261634	0.999616
3901	cbn-mir-64f	mir-64f	3.15762	0.95533	3.25589	4.1641	1.56775	1.16335	0	0	1.78301	1.73598	-1.12207	-1.94789	0.259195	0.261834	0.999616
19893	hsa-mir-6068	mir-6068	0	1.91066	0	1.66564	3.91938	2.90839	4.33187	2.56885	2.1631	1.64256	1.12182	1.84265	3.58668	0.261941	0.999616
19472	hsa-miR-6771-5p	miR-6771-5p	0	0	3.25589	0	5.48713	1.16335	5.41484	0	1.91515	2.06196	1.12146	2.31241	4.96711	0.262091	0.999616
26189	vvi-MIR166e	MIR166e	8.42032	10.5086	16.2795	0	0.783876	4.65342	2.16594	3.85327	5.83311	1.42887	-1.12111	-1.60192	0.329437	0.262241	0.999616
23140	pma-mir-4545	mir-4545	2.10508	1.91066	6.51179	0	0.783876	1.16335	0	0	1.55934	1.97081	-1.11798	-2.20332	0.217137	0.263577	0.999616
31313	piR-hsa-25409	piR-hsa-25409	0	0.95533	9.76768	0.83282	1.56775	0.581677	0	0	1.71316	2.01008	-1.11646	-2.24418	0.211074	0.264225	0.999616
17106	esi-MIR3454b-3p	MIR3454b-3p	10.5254	0.95533	1.62795	0	0.783876	0	2.16594	0	2.00731	1.96776	-1.11454	-2.19315	0.218673	0.265047	0.999616
28106	pma-miR-4599b-3p	miR-4599b-3p	1.05254	0.95533	0	0	3.1355	0	2.16594	5.13769	1.55587	1.9942	1.11364	2.22083	4.66161	0.265432	0.999616
36130	piR-hsa-2809	piR-hsa-2809	6.31524	0.95533	4.88384	1.66564	1.56775	1.16335	1.08297	0	2.20427	1.59489	-1.1132	-1.77542	0.292109	0.265624	0.999616
10050	gra-MIR8665-5p	MIR8665-5p	12.6305	10.5086	4.88384	5.82974	15.6775	9.30684	31.4061	23.1196	14.1703	1.09632	1.11218	1.21931	2.32835	0.26606	0.999616
16964	efu-miR-9353-3p	miR-9353-3p	2.10508	0	0	0.83282	3.1355	1.74503	4.33187	2.56885	1.83989	1.73613	1.11206	1.93068	3.81236	0.266111	0.999616
39851	piR-hsa-25885	piR-hsa-25885	0	0	0	1.66564	0.783876	0.581677	2.16594	6.42211	1.45241	2.03837	1.112	2.26667	4.81211	0.266137	0.999616
30814	mmu-miR-759	miR-759	1.05254	4.77665	3.25589	2.49846	6.271	6.98013	5.41484	11.5598	5.22616	1.24214	1.11046	1.37934	2.6015	0.266801	0.999616
24914	sja-miR-61-3p	miR-61-3p	2.10508	0.95533	0	0.83282	0.783876	2.32671	8.66375	2.56885	2.27955	1.63018	1.11038	1.81012	3.50672	0.266835	0.999616
6019	hsa-miR-3960-3p	miR-3960-3p	5.2627	2.86599	3.25589	0.83282	0.783876	0.581677	1.08297	1.28442	1.99379	1.5727	-1.10963	-1.74511	0.29831	0.26716	0.999616
1670	mmu-miR-5615-1-5p	miR-5615-1-5p	2.10508	1.91066	1.62795	3.33128	4.70325	8.72516	3.2489	7.70654	4.16985	1.28641	1.10743	1.42461	2.68441	0.268108	0.999616
12068	ame-mir-6042	mir-6042	0	2.86599	0	0	1.56775	2.90839	5.41484	2.56885	1.91573	1.84565	1.10209	2.03406	4.09557	0.270424	0.999616
19835	hsa-mir-5011	mir-5011	2.10508	2.86599	3.25589	0	1.56775	4.65342	21.6594	0	4.51344	1.62593	1.10057	1.78944	3.45681	0.271085	0.999616
24740	rno-mir-764	mir-764	2.10508	5.73198	1.62795	2.49846	0	0	2.16594	1.28442	1.92673	1.75991	-1.10055	-1.93687	0.261182	0.271091	0.999616
16247	dre-mir-724	mir-724	5.2627	6.68731	3.25589	2.49846	1.56775	1.74503	0	2.56885	2.94825	1.44958	-1.10038	-1.59509	0.331001	0.271166	0.999616
13633	bra-MIR9560a-5p	MIR9560a-5p	1.05254	0.95533	0	0	3.1355	0.581677	6.49781	0	1.52786	2.01428	1.09823	2.21215	4.63364	0.272104	0.999616
19722	hsa-mir-3943	mir-3943	0	0.95533	0	1.66564	3.91938	3.49006	4.33187	0	1.79529	1.86634	1.09682	2.04704	4.13258	0.272721	0.999616
31003	piR-hsa-28116	piR-hsa-28116	33.6813	127.059	37.4428	41.641	18.813	34.9006	166.777	380.189	105.063	1.20563	1.09641	1.32187	2.4999	0.272898	0.999616
661	cgr-miR-187-5p	miR-187-5p	0	0	0	10.8267	16.4614	10.4702	17.3275	0	6.88572	1.81732	1.09584	1.99149	3.97649	0.273149	0.999616
37983	piR-hsa-717	piR-hsa-717	6.31524	8.59797	0	3.33128	0.783876	1.74503	2.16594	1.28442	3.02797	1.49401	-1.09434	-1.63496	0.32198	0.273806	0.999616
14061	bta-mir-330	mir-330	3.15762	5.73198	1.62795	4.1641	0	1.16335	1.08297	2.56885	2.4371	1.54498	-1.09395	-1.69013	0.3099	0.273976	0.999616
28394	sko-miR-4821-3p	miR-4821-3p	0	9.5533	4.88384	6.66256	8.62263	5.2351	11.9127	32.1106	9.87258	1.31633	1.0924	1.43796	2.70938	0.274657	0.999616
336	bta-miR-185-5p	miR-185-5p	122.095	118.461	249.076	0	0	0	101.799	0	73.9288	2.07598	-1.09222	-2.26742	0.207701	0.274738	0.999616
12970	bfl-mir-210	mir-210	0	1.91066	0	0	2.35163	2.90839	0	5.13769	1.53855	2.08223	1.09192	2.27364	4.83541	0.274867	0.999616
205	age-miR-29a-3p	miR-29a-3p	3117.62	3828.96	2909.14	4722.09	0	0	2970.58	0	2193.55	2.10369	-1.09094	-2.29499	0.203769	0.2753	0.999616
36176	piR-hsa-28347	piR-hsa-28347	2.10508	0	0	0	1.56775	1.16335	2.16594	5.13769	1.51748	1.955	1.0895	2.12998	4.37711	0.275933	0.999616
28867	der-miR-6-2-5p	miR-6-2-5p	5.2627	0.95533	9.76768	0.83282	1.56775	1.16335	2.16594	0	2.71445	1.57481	-1.08847	-1.71413	0.304787	0.276389	0.999616
19752	hsa-mir-4452	mir-4452	4.21016	5.73198	3.25589	4.1641	0	2.32671	2.16594	1.28442	2.8924	1.46233	-1.08684	-1.58933	0.332327	0.277107	0.999616
38729	piR-hsa-11931	piR-hsa-11931	1.05254	0	1.62795	1.66564	2.35163	2.32671	5.41484	3.85327	2.28657	1.56581	1.08189	1.69404	3.23561	0.279301	0.999616
40794	HBII-52-48	-100	8.42032	1.91066	1.62795	4.1641	9.40651	12.7969	4.33187	14.1286	7.09837	1.2203	1.08143	1.31968	2.4961	0.279505	0.999616
28368	sbi-MIR319a-5p	MIR319a-5p	95.7811	54.4538	245.82	0	35.2744	41.2991	53.0654	3.85327	66.1934	1.44919	-1.08008	-1.56524	0.337921	0.280108	0.999616
21019	mml-mir-496	mir-496	0	2.86599	4.88384	0	0.783876	13.3786	9.74671	1.28442	4.11793	1.65041	1.07931	1.78131	3.43739	0.280448	0.999616
25867	tca-mir-279d	mir-279d	11.5779	9.5533	9.76768	4.99692	7.83876	4.65342	38.9869	34.6794	15.2568	1.16719	1.07783	1.25803	2.39169	0.281111	0.999616
15979	dpr-MIR396-3p	MIR396-3p	0	0	0	7.49538	7.83876	9.88851	1.08297	8.99096	4.41207	1.69659	1.07691	1.82708	3.54818	0.281519	0.999616
31004	piR-hsa-28131	piR-hsa-28131	44201.4	77853.6	46233.7	0	32243.9	1.74503	6.49781	1.28442	25067.8	2.21424	-1.07638	-2.38336	0.191663	0.281758	0.999616
5044	efu-mir-9198c	mir-9198c	3.15762	0.95533	0	7.49538	0.783876	1.16335	1.08297	0	1.82982	1.78215	-1.07464	-1.91517	0.26514	0.282535	0.999616
20016	hsv1-miR-H14-5p	-miR-H14-5p	3.15762	0	8.13973	0.83282	0.783876	0	1.08297	1.28442	1.91018	1.84398	-1.07343	-1.9794	0.253596	0.283076	0.999616
18293	gra-MIR1446-5p	MIR1446-5p	3.15762	7.64264	1.62795	2.49846	0.783876	0	0	3.85327	2.44548	1.69479	-1.07277	-1.81812	0.283591	0.283374	0.999616
12760	bdi-MIR5174a	MIR5174a	1.05254	8.59797	1.62795	0	0	0.581677	1.08297	1.28442	1.77844	1.8822	-1.0714	-2.01659	0.247142	0.28399	0.999616
23023	pma-miR-30g-3p	miR-30g-3p	0	0	0	2.49846	1.56775	2.32671	8.66375	0	1.88208	2.03055	1.07066	2.17402	4.5128	0.284324	0.999616
16561	eca-miR-9013-5p	miR-9013-5p	2.10508	0.95533	4.88384	1.66564	0	1.16335	1.08297	0	1.48203	1.84641	-1.07004	-1.97574	0.25424	0.284602	0.999616
8685	tgu-miR-214-3p	miR-214-3p	0	0	1.62795	1.66564	5.48713	1.74503	5.41484	0	1.99257	1.8643	1.06828	1.9916	3.97678	0.285392	0.999616
20394	lva-mir-153	mir-153	8.42032	0	0	2.49846	1.56775	0.581677	0	0	1.63353	2.10151	-1.06778	-2.24395	0.211108	0.28562	0.999616
15714	dev-miR-D24-5p	miR-D24-5p	1.05254	4.77665	3.25589	2.49846	0.783876	0.581677	1.08297	1.28442	1.91456	1.57229	-1.06764	-1.67864	0.312378	0.285685	0.999616
24322	ptr-mir-202	mir-202	1.05254	5.73198	3.25589	0	0	0	2.16594	0	1.52579	2.14255	-1.06704	-2.28619	0.205016	0.285953	0.999616
21009	mml-mir-431	mir-431	91.5709	0.95533	76.5135	71.6225	0	60.4944	0	0	37.6446	1.85843	-1.06637	-1.98177	0.253178	0.286258	0.999616
24716	rno-mir-449c	mir-449c	0	0.95533	8.13973	4.99692	0.783876	0.581677	0	2.56885	2.2533	1.76216	-1.06605	-1.87855	0.271957	0.286402	0.999616
18194	gma-MIR530c	MIR530c	0	1.91066	11.3956	4.1641	3.1355	0.581677	1.08297	0	2.78382	1.68653	-1.06371	-1.79399	0.288374	0.287459	0.999616
6194	hsa-miR-7850-5p	miR-7850-5p	18.9457	10.5086	11.3956	8.3282	15.6775	16.8686	40.0698	34.6794	19.5592	1.05571	1.06275	1.12195	2.17641	0.287897	0.999616
28019	oha-mir-15a	mir-15a	0	1.91066	0	1.66564	2.35163	2.32671	2.16594	6.42211	2.10534	1.6716	1.06159	1.77456	3.42133	0.28842	0.999616
9095	bdi-MIR399d	MIR399d	0	1.91066	6.51179	0.83282	1.56775	0	0	0	1.35288	2.18065	-1.06142	-2.31459	0.20102	0.288497	0.999616
21069	mml-mir-7200	mir-7200	0	1.91066	0	0	3.1355	2.32671	1.08297	2.56885	1.37809	1.97367	1.06133	2.09472	4.27142	0.28854	0.999616
26186	vvi-MIR159a-3p	MIR159a-3p	1.05254	0	8.13973	0	0.783876	0.581677	0	0	1.31973	2.24599	-1.06128	-2.38361	0.191629	0.288564	0.999616
33027	piR-hsa-14433	piR-hsa-14433	0	0.95533	0	0.83282	0	0.581677	6.49781	2.56885	1.42956	2.06217	1.0606	2.18713	4.55398	0.288874	0.999616
37486	piR-hsa-5060	piR-hsa-5060	2.10508	0.95533	3.25589	4.1641	0.783876	1.74503	0	0	1.62616	1.78408	-1.05668	-1.8852	0.270705	0.290657	0.999616
23770	ppy-miR-345-3p	miR-345-3p	6.31524	0	0	2.49846	0.783876	6.98013	5.41484	15.4131	4.6757	1.56826	1.05668	1.65715	3.15392	0.290658	0.999616
17867	ggo-mir-873	mir-873	0	1.91066	0	0.83282	0	1.74503	6.49781	3.85327	1.85495	1.90581	1.05667	2.01381	4.03848	0.290661	0.999616
19984	hsa-mir-7151	mir-7151	2.10508	4.77665	3.25589	1.66564	0	0	1.08297	2.56885	1.93188	1.7508	-1.05492	-1.84695	0.27798	0.291463	0.999616
27495	hco-miR-5909-3p	miR-5909-3p	0	0.95533	1.62795	0	1.56775	3.49006	1.08297	2.56885	1.41161	1.88258	1.05408	1.98439	3.95696	0.291845	0.999616
30951	piR-hsa-2153	piR-hsa-2153	6.31524	12.4193	0	9.16102	12.542	11.6335	12.9956	33.395	12.3077	1.24285	1.05376	1.30967	2.47884	0.291993	0.999616
8182	rlcv-miR-rL1-29-3p	-miR-rL1-29-3p	0	0	1.62795	0.83282	1.56775	1.16335	3.2489	2.56885	1.3762	1.88473	1.05269	1.98404	3.956	0.292482	0.999616
28838	cbr-mir-35b-5	mir-35b-5	0	1.91066	0	0	3.91938	0.581677	2.16594	2.56885	1.39331	1.99812	1.05037	2.09876	4.28342	0.293548	0.999616
22939	pde-MIR162	MIR162	1.05254	4.77665	9.76768	1.66564	0	3.49006	0	1.28442	2.75462	1.67336	-1.05029	-1.75751	0.295759	0.293585	0.999616
13960	bta-mir-202	mir-202	13.683	0.95533	17.9074	24.9846	0	15.1236	0	2.56885	9.40285	1.58944	-1.04962	-1.66831	0.314622	0.293894	0.999616
33230	piR-hsa-15252	piR-hsa-15252	5.2627	14.3299	13.0236	5.82974	1.56775	2.90839	9.74671	1.28442	6.74415	1.25306	-1.04915	-1.31464	0.402026	0.294111	0.999616
278	bmo-mir-6497	mir-6497	0	9.5533	8.13973	8.3282	14.1098	7.5618	27.0742	16.6975	11.4331	1.26479	1.04902	1.3268	2.50845	0.294168	0.999616
15251	cpa-MIR398	MIR398	10.5254	1.91066	4.88384	2.49846	1.56775	1.16335	2.16594	2.56885	3.41053	1.36681	-1.04863	-1.43327	0.37029	0.29435	0.999616
866	eca-miR-224-3p	miR-224-3p	6.31524	6.68731	4.88384	2.49846	2.35163	0	4.33187	0	3.38354	1.55197	-1.04823	-1.62683	0.3238	0.294531	0.999616
4408	cte-let-7-3p	let-7-3p	1.05254	0.95533	6.51179	0.83282	0	0	0	2.56885	1.49016	2.05421	-1.04774	-2.15228	0.224956	0.294758	0.999616
15602	ctr-MIR319	MIR319	1.05254	1.91066	3.25589	2.49846	0.783876	1.16335	0	0	1.3331	1.86534	-1.04733	-1.95363	0.258165	0.294947	0.999616
14280	cbr-mir-35e	mir-35e	3.15762	9.5533	1.62795	2.49846	0.783876	1.16335	0	3.85327	2.82973	1.5366	-1.047	-1.60882	0.327867	0.2951	0.999616
37216	piR-hsa-3837	piR-hsa-3837	0	1.91066	0	1.66564	2.35163	3.49006	4.33187	2.56885	2.03984	1.66063	1.04554	1.73625	3.33168	0.295776	0.999616
40672	ACA9		1.05254	0	1.62795	0.83282	0	4.65342	6.49781	1.28442	1.99362	1.8097	1.04511	1.89134	3.70981	0.295971	0.999616
15816	dme-miR-9379-5p	miR-9379-5p	0	0	3.25589	0	0	0	5.41484	7.70654	2.04716	2.26498	1.04457	2.36594	5.15488	0.296221	0.999616
111	aca-miR-203-3p	miR-203-3p	4.21016	3.82132	3.25589	1.66564	0	1.74503	1.08297	1.28442	2.13318	1.57515	-1.04449	-1.64522	0.319697	0.296261	0.999616
40168	piR-hsa-31024	piR-hsa-31024	15.7881	4.77665	14.6515	14.9908	82.3069	13.9603	8.66375	12.8442	20.9978	1.18356	1.04428	1.23596	2.35539	0.296358	0.999616
17662	gga-mir-2954	mir-2954	1.05254	3.82132	0	0	3.91938	7.5618	1.08297	3.85327	2.66141	1.65093	1.04275	1.7215	3.29779	0.297066	0.999616
19340	hsa-miR-5581-5p	miR-5581-5p	0	0.95533	0	0.83282	2.35163	0.581677	0	6.42211	1.39295	2.05318	1.04251	2.14045	4.40899	0.297177	0.999616
6969	mmu-mir-7035	mir-7035	25.2609	18.1513	1.62795	7.49538	18.813	10.4702	71.4759	25.6885	22.3729	1.20476	1.04199	1.25535	2.38725	0.297415	0.999616
20593	mdo-miR-7371b-1-5p	miR-7371b-1-5p	1.05254	2.86599	0	0.83282	3.1355	2.32671	2.16594	7.70654	2.51075	1.54224	1.04135	1.60601	3.04409	0.297714	0.999616
15543	cte-miR-2b-3p	miR-2b-3p	1.05254	0.95533	1.62795	0	1.56775	5.2351	3.2489	1.28442	1.8715	1.68227	1.03897	1.74783	3.35854	0.298817	0.999616
30578	hsa-miR-764-5p	miR-764-5p	1.05254	2.86599	3.25589	1.66564	0	1.74503	0	0	1.32314	1.98921	-1.03836	-2.06552	0.2389	0.299103	0.999616
25619	stu-MIR319a	MIR319a	0	0	8.13973	4.1641	4.70325	0	0	44.9548	7.74523	1.95868	1.03754	2.03221	4.0903	0.299485	0.999616
1540	mmu-miR-383-5p	miR-383-5p	2.10508	0	0	0	3.1355	0	2.16594	5.13769	1.56803	2.10689	1.03743	2.18576	4.54966	0.299534	0.999616
16723	eca-mir-8908f-1	mir-8908f-1	4.21016	0.95533	4.88384	2.49846	3.1355	0	0	0	1.96041	1.85474	-1.03659	-1.9226	0.263779	0.299929	0.999616
35769	piR-hsa-26462	piR-hsa-26462	3.15762	5.73198	4.88384	1.66564	3.91938	0.581677	0	0	2.49252	1.64425	-1.03432	-1.70068	0.30764	0.300985	0.999616
26390	zma-MIR171c	MIR171c	0	0	1.62795	0.83282	1.56775	2.90839	4.33187	0	1.4086	1.99553	1.03423	2.06384	4.18097	0.301028	0.999616
19530	hsa-miR-6861-3p	miR-6861-3p	5.2627	3.82132	1.62795	0	1.56775	0	1.08297	0	1.67034	1.94497	-1.03422	-2.01152	0.248012	0.301035	0.999616
24878	sha-mir-100	mir-100	2.10508	3.82132	8.13973	0.83282	0.783876	1.74503	1.08297	1.28442	2.47441	1.49904	-1.0335	-1.54925	0.341687	0.301371	0.999616
20165	isc-bantam	bantam	5.2627	4.77665	1.62795	0	0.783876	1.16335	0	1.28442	1.86237	1.78037	-1.033	-1.83912	0.279493	0.301605	0.999616
40914	U68		2.10508	0.95533	6.51179	0.83282	1.56775	0	1.08297	0	1.63197	1.85476	-1.03294	-1.91586	0.265013	0.30163	0.999616
20456	mdm-MIR171i	MIR171i	1.05254	0.95533	0	0	0.783876	2.32671	0	6.42211	1.44257	2.02749	1.03235	2.09308	4.26659	0.301907	0.999616
17189	fru-mir-19a	mir-19a	11.5779	0	0	0.83282	0.783876	0	1.08297	1.28442	1.94525	1.99962	-1.03081	-2.06123	0.239612	0.30263	0.999616
17763	ggo-miR-4484-3p	miR-4484-3p	0	0	0	9.99384	0.783876	0	1.08297	0	1.48259	2.36334	-1.03063	-2.43574	0.184829	0.302714	0.999616
34617	piR-hsa-21306	piR-hsa-21306	0	5.73198	4.88384	0	0	1.74503	0	0	1.54511	2.28271	-1.03058	-2.35252	0.195804	0.302737	0.999616
7570	osa-MIR5501	MIR5501	2.10508	0.95533	6.51179	1.66564	0.783876	1.16335	0	1.28442	1.80869	1.68005	-1.02953	-1.72966	0.301523	0.30323	0.999616
19182	hsa-miR-4524b-3p	miR-4524b-3p	2.10508	0.95533	0	8.3282	2.35163	16.287	0	17.9819	6.00114	1.59606	1.02864	1.64177	3.12048	0.30365	0.999616
21690	mtr-MIR2655f	MIR2655f	1.05254	2.86599	0	0.83282	0.783876	0.581677	14.0786	1.28442	2.68499	1.6944	1.02796	1.74178	3.34448	0.303968	0.999616
29233	pma-let-7a-2	let-7a-2	2.10508	1.91066	1.62795	4.1641	8.62263	2.32671	6.49781	7.70654	4.37018	1.28785	1.02691	1.3225	2.50099	0.304465	0.999616
1577	mmu-miR-466l-5p	miR-466l-5p	1.05254	0.95533	0	0.83282	0.783876	2.90839	5.41484	1.28442	1.65403	1.73418	1.02668	1.78044	3.43531	0.304573	0.999616
21363	mmu-mir-6348	mir-6348	1.05254	0.95533	0	0	0.783876	4.07174	1.08297	2.56885	1.31441	1.92087	1.02588	1.97059	3.91928	0.304947	0.999616
20029	hsv1-mir-H26	#NAME?	2.10508	0	0	0	4.70325	4.07174	1.08297	0	1.49538	2.10568	1.02582	2.16005	4.46931	0.304976	0.999616
18925	hsa-miR-1291-3p	miR-1291-3p	0	5.73198	6.51179	0	2.35163	0	0	0	1.82442	2.23537	-1.02562	-2.29263	0.204103	0.305073	0.999616
11771	aly-MIR3437	MIR3437	1.05254	0	0	1.66564	0.783876	1.74503	4.33187	3.85327	1.67903	1.7961	1.02495	1.84093	3.5824	0.305385	0.999616
1424	mmu-miR-3079-5p	miR-3079-5p	2.10508	0.95533	0	2.49846	4.70325	1.74503	6.49781	3.85327	2.79478	1.47953	1.02463	1.51596	2.8599	0.305538	0.999616
40521	piR-hsa-7593	piR-hsa-7593	1.05254	0.95533	0	0	0	0.581677	6.49781	2.56885	1.45703	2.05269	1.02458	2.10315	4.29646	0.305561	0.999616
38710	piR-hsa-11602	piR-hsa-11602	2.10508	0	4.88384	2.49846	0	1.74503	0	0	1.40405	2.11671	-1.02367	-2.16681	0.222702	0.305991	0.999616
6044	hsa-miR-4485-5p	miR-4485-5p	1.05254	0.95533	0	1.66564	0	1.74503	5.41484	6.42211	2.15694	1.73857	1.02294	1.77846	3.4306	0.306336	0.999616
11841	aly-MIR840-5p	MIR840-5p	0	0	1.62795	0.83282	0	2.32671	5.41484	1.28442	1.43584	2.03056	1.02211	2.07545	4.21477	0.30673	0.999616
6907	mmu-mir-3960	mir-3960	3.15762	1.91066	4.88384	0	0.783876	0.581677	0	1.28442	1.57526	1.85224	-1.02155	-1.89215	0.269406	0.306996	0.999616
1794	mmu-miR-6914-3p	miR-6914-3p	5.2627	1.91066	3.25589	1.66564	0	2.90839	0	0	1.87541	1.84147	-1.02095	-1.88004	0.271676	0.307279	0.999616
10338	hsa-mir-7845	mir-7845	0	1.91066	0	0.83282	1.56775	1.74503	1.08297	6.42211	1.69517	1.80565	1.01962	1.84107	3.58277	0.30791	0.999616
364	bta-miR-223-5p	miR-223-5p	23.1559	39.1685	42.3266	0	0	26.7572	0	0	16.426	1.90757	-1.01931	-1.94441	0.259821	0.308055	0.999616
360	bta-miR-210-3p	miR-210-3p	3555.48	3824.18	2126.1	6750.84	0	0	0	3610.51	2483.39	2.13069	-1.01885	-2.17086	0.222079	0.308273	0.999616
18865	hme-mir-9b	mir-9b	1.05254	0	0	0.83282	0	1.74503	2.16594	5.13769	1.36675	2.02411	1.01745	2.05944	4.16823	0.308938	0.999616
26054	tgu-miR-2993-5p	miR-2993-5p	0	1.91066	3.25589	4.99692	0	0.581677	1.08297	1.28442	1.63907	1.83233	-1.01724	-1.86392	0.274729	0.30904	0.999616
39080	piR-hsa-16047	piR-hsa-16047	3.15762	4.77665	1.62795	0.83282	1.56775	1.16335	0	0	1.64077	1.78056	-1.01695	-1.81074	0.285044	0.309177	0.999616
7111	mtr-MIR2680a-5p	MIR2680a-5p	0	0.95533	0	0.83282	0.783876	0	3.2489	5.13769	1.36983	2.06558	1.01668	2.10004	4.2872	0.309307	0.999616
17333	gga-miR-1731-5p	miR-1731-5p	0	2.86599	0	0	3.91938	0.581677	3.2489	3.85327	1.80865	1.8929	1.01602	1.92321	3.79267	0.309622	0.999616
16218	dre-mir-16c	mir-16c	1.05254	3.82132	0	4.1641	0	1.74503	0	0	1.34787	2.12486	-1.01586	-2.15855	0.223981	0.309698	0.999616
28914	dre-mir-23a-2	mir-23a-2	1.05254	2.86599	1.62795	0	4.70325	2.90839	4.33187	3.85327	2.66791	1.50649	1.01567	1.53009	2.88804	0.309786	0.999616
40630	piR-hsa-9477	piR-hsa-9477	3.15762	4.77665	0	0	2.35163	2.32671	11.9127	7.70654	4.02897	1.54434	1.01539	1.5681	2.96514	0.309921	0.999616
12266	asu-mir-5357	mir-5357	0	1.91066	0	0	1.56775	2.32671	2.16594	2.56885	1.31749	1.97677	1.01504	2.00651	4.0181	0.310085	0.999616
17207	gga-let-7f-5p	let-7f-5p	1.05254	0	0	0.83282	0	0	0	11.5598	1.68065	2.37356	1.0149	2.40894	5.31083	0.310152	0.999616
14350	ccr-miR-132b-5p	miR-132b-5p	1.05254	0	1.62795	1.66564	3.1355	1.74503	4.33187	3.85327	2.17648	1.57573	1.01487	1.59916	3.02967	0.310167	0.999616
13574	bna-MIR169m	MIR169m	0	0.95533	1.62795	0.83282	0.783876	5.2351	2.16594	2.56885	1.77123	1.70813	1.01271	1.72984	3.31692	0.311199	0.999616
14628	cfa-miR-330-5p	miR-330-5p	1.05254	1.91066	4.88384	0.83282	0	0	2.16594	0	1.35572	2.03558	-1.01261	-2.06124	0.23961	0.311249	0.999616
8171	rco-MIR403a	MIR403a	0	0	0	1.66564	4.70325	0	3.2489	1.28442	1.36278	2.17431	1.01204	2.20049	4.59634	0.311519	0.999616
12240	asu-mir-100b	mir-100b	2.10508	0	0	0	3.1355	0	4.33187	2.56885	1.51766	2.11127	1.01179	2.13616	4.39591	0.311639	0.999616
12477	ath-MIR829	MIR829	1.05254	0.95533	0	0	2.35163	0.581677	4.33187	1.28442	1.31968	1.92606	1.01093	1.94711	3.85602	0.312049	0.999616
16491	eca-miR-664-5p	miR-664-5p	1.05254	2.86599	0	3.33128	1.56775	0.581677	1.08297	20.5508	3.87912	1.61114	1.01041	1.62791	3.09066	0.312297	0.999616
11831	aly-MIR825	MIR825	1.05254	1.91066	0	0	1.56775	1.16335	4.33187	3.85327	1.73493	1.77539	1.0103	1.79368	3.46698	0.312351	0.999616
16948	efu-miR-9327-3p	miR-9327-3p	7.36778	3.82132	8.13973	2.49846	2.35163	4.65342	0	0	3.60404	1.52013	-1.0098	-1.53502	0.345074	0.312593	0.999616
2279	mmu-mir-495	mir-495	1.05254	4.77665	3.25589	0.83282	2.35163	0	0	0	1.53369	1.97183	-1.00962	-1.9908	0.2516	0.312678	0.999616
5123	efu-mir-99b	mir-99b	2.10508	0	0	0	1.56775	0.581677	3.2489	3.85327	1.41958	1.99322	1.00819	2.00954	4.02655	0.313363	0.999616
38467	piR-hsa-9472	piR-hsa-9472	0	0	3.25589	0	0.783876	0.581677	7.58078	1.28442	1.68583	2.03875	1.00733	2.05369	4.15168	0.313777	0.999616
20083	hvu-MIR6181-3p	MIR6181-3p	0	1.91066	0	5.82974	8.62263	1.74503	0	16.6975	4.35069	1.72589	1.00638	1.7369	3.33319	0.314233	0.999616
22266	oan-mir-301	mir-301	6.31524	3.82132	9.76768	4.99692	1.56775	4.65342	1.08297	2.56885	4.34677	1.28207	-1.0058	-1.2895	0.409093	0.314513	0.999616
15831	dme-miR-967-5p	miR-967-5p	1.05254	0	1.62795	0	0.783876	3.49006	0	5.13769	1.51151	2.01146	1.00564	2.02281	4.06373	0.314589	0.999616
513	bta-mir-376a	mir-376a	32.6287	19.1066	30.931	16.6564	0	21.5221	14.0786	0	16.8654	1.45932	-1.00502	-1.46664	0.361823	0.314888	0.999616
24597	rno-miR-3570-5p	miR-3570-5p	2.10508	0	9.76768	1.66564	1.56775	0	1.08297	1.28442	2.18419	1.77212	-1.0033	-1.77797	0.291593	0.315714	0.999616
7738	pmi-mir-2010	mir-2010	1.05254	0.95533	0	0.83282	3.91938	5.2351	0	1.28442	1.65995	1.82756	1.00241	1.83196	3.56019	0.316148	0.999616
20438	mdm-MIR156t	MIR156t	2.10508	0.95533	0	0	0.783876	1.16335	5.41484	3.85327	1.78447	1.8002	1.00225	1.80424	3.49246	0.316224	0.999616
40790	HBII-429	-429	1.05254	3.82132	3.25589	2.49846	0	1.74503	0	1.28442	1.70721	1.76277	-1.00211	-1.76649	0.293924	0.316292	0.999616
13249	bmo-miR-306b-5p	miR-306b-5p	2.10508	2.86599	21.1633	0	3.1355	0.581677	4.33187	0	4.27293	1.66223	-1.00187	-1.66533	0.315273	0.316409	0.999616
15118	cin-mir-4062	mir-4062	0	2.86599	0	0.83282	1.56775	0.581677	0	12.8442	2.33656	1.92135	0.999622	1.92062	3.78585	0.317494	0.999616
7477	osa-MIR1870	MIR1870	1.05254	11.464	4.88384	0	0	0.581677	4.33187	0	2.78924	1.85658	-0.998754	-1.85427	0.276572	0.317914	0.999616
13713	bta-miR-2285r-3p	miR-2285r-3p	3.15762	5.73198	3.25589	0	0	1.16335	2.16594	0	1.93435	1.85435	-0.997527	-1.84977	0.277437	0.318509	0.999616
29377	tgu-mir-2989-2	mir-2989-2	1.05254	6.68731	1.62795	4.1641	7.05488	5.81677	2.16594	19.2663	5.97948	1.30742	0.997268	1.30385	2.46887	0.318635	0.999616
21078	mml-mir-934	mir-934	3.15762	12.4193	24.4192	0.83282	0	5.81677	0	7.70654	6.79403	1.594	-0.995421	-1.5867	0.332931	0.319532	0.999616
18179	gma-MIR4998-3p	MIR4998-3p	2.10508	0	6.51179	0.83282	0	0	2.16594	0	1.45195	2.16744	-0.995016	-2.15663	0.224279	0.319728	0.999616
21966	nta-MIR6162-3p	MIR6162-3p	156.828	0	1.62795	130.753	0.783876	0	75.8078	1.28442	45.8856	1.90677	-0.994853	-1.89695	0.26851	0.319808	0.999616
8497	ssa-miR-7a-1-5p	miR-7a-1-5p	0	0	4.88384	0	0	0.581677	0	20.5508	3.25203	2.22985	0.994507	2.2176	4.65118	0.319976	0.999616
3660	bna-MIR160b	MIR160b	22.1033	21.0173	13.0236	6.66256	17.2453	16.8686	81.2226	20.5508	24.8367	1.11788	0.993404	1.1105	2.15921	0.320513	0.999616
15327	cre-MIR1158-3p	MIR1158-3p	1.05254	7.64264	4.88384	3.33128	2.35163	0.581677	2.16594	1.28442	2.91174	1.43058	-0.993003	-1.42057	0.373564	0.320708	0.999616
38090	piR-hsa-7714	piR-hsa-7714	0	7.64264	0	4.99692	0.783876	1.74503	35.738	2.56885	6.68441	1.66459	0.992272	1.65172	3.14209	0.321065	0.999616
5938	hme-mir-932	mir-932	2.10508	0	0	0	0.783876	1.16335	3.2489	3.85327	1.39431	1.99507	0.991762	1.97863	3.94119	0.321314	0.999616
21027	mml-mir-518f	mir-518f	0	3.82132	11.3956	0	0	2.32671	0	1.28442	2.35351	2.01349	-0.991748	-1.99687	0.250543	0.321321	0.999616
325	bta-miR-16b-5p	miR-16b-5p	2.10508	0	0	1.66564	0	12.7969	0	2.56885	2.39206	2.01948	0.991399	2.00211	4.00585	0.321491	0.999616
29311	ssa-mir-1-2	mir-1-2	5.2627	8.59797	1.62795	5.82974	11.7581	7.5618	18.4105	10.2754	8.66552	1.15465	0.991173	1.14445	2.21062	0.321601	0.999616
37142	piR-hsa-3463	piR-hsa-3463	3.15762	3.82132	0	1.66564	0	0	0	2.56885	1.40168	2.12789	-0.990576	-2.10784	0.231995	0.321893	0.999616
14648	cfa-miR-8795-5p	miR-8795-5p	0	3.82132	3.25589	1.66564	0.783876	1.16335	0	0	1.33626	1.99104	-0.990432	-1.97199	0.254901	0.321963	0.999616
13233	bmo-miR-2830-1-3p	miR-2830-1-3p	0	5.73198	0	3.33128	2.35163	1.16335	6.49781	17.9819	4.63225	1.57372	0.989743	1.55758	2.94359	0.3223	0.999616
34511	piR-hsa-20805	piR-hsa-20805	3.15762	7.64264	13.0236	0.83282	1.56775	4.07174	1.08297	2.56885	4.24349	1.37291	-0.98937	-1.35832	0.390036	0.322482	0.999616
1557	mmu-miR-465a-5p	miR-465a-5p	0	4.77665	1.62795	9.16102	4.70325	25.5938	4.33187	6.42211	7.07708	1.39816	0.988782	1.38247	2.60715	0.32277	0.999616
7665	peu-MIR2916-3p	MIR2916-3p	2.10508	2.86599	3.25589	0.83282	2.35163	2.90839	10.8297	6.42211	3.94645	1.34066	0.988085	1.32469	2.50479	0.323111	0.999616
22537	osa-MIR1436	MIR1436	2.10508	1.91066	0	0.83282	3.1355	1.16335	6.49781	3.85327	2.43731	1.5408	0.987832	1.52205	2.872	0.323235	0.999616
37828	piR-hsa-6500	piR-hsa-6500	2.10508	0.95533	3.25589	3.33128	1.56775	0	0	1.28442	1.56247	1.81869	-0.987486	-1.79594	0.287985	0.323404	0.999616
40613	piR-hsa-9138	piR-hsa-9138	7.36778	5.73198	17.9074	6.66256	5.48713	4.07174	3.2489	3.85327	6.79135	1.16709	-0.987124	-1.15206	0.449983	0.323582	0.999616
32399	piR-hsa-12323	piR-hsa-12323	5.2627	7.64264	8.13973	4.1641	3.1355	2.90839	2.16594	2.56885	4.49848	1.22705	-0.984563	-1.20811	0.432837	0.324839	0.999616
15110	cin-mir-4033	mir-4033	5.2627	7.64264	6.51179	0.83282	7.83876	9.88851	10.8297	16.6975	8.18805	1.18959	0.982653	1.16895	2.24848	0.325778	0.999616
12857	bdi-MIR7783	MIR7783	1.05254	7.64264	6.51179	2.49846	0	1.74503	2.16594	2.56885	3.02315	1.5008	-0.982133	-1.47398	0.359987	0.326034	0.999616
21887	nlo-miR-993-3p	miR-993-3p	1.05254	2.86599	1.62795	0	0.783876	0.581677	5.41484	10.2754	2.82528	1.63465	0.981322	1.60411	3.04009	0.326434	0.999616
2212	mmu-mir-292a	mir-292a	7.36778	10.5086	22.7912	6.66256	5.48713	3.49006	7.58078	5.13769	8.62823	1.1405	-0.980474	-1.11823	0.460659	0.326852	0.999616
26668	bma-miR-5877-3p	miR-5877-3p	12.6305	13.3746	9.76768	9.99384	7.05488	2.90839	8.66375	2.56885	8.37031	1.13703	-0.980037	-1.11433	0.461906	0.327068	0.999616
13925	bta-miR-767-5p	miR-767-5p	0	0	9.76768	0.83282	0	0	2.16594	0	1.5958	2.34309	-0.979477	-2.295	0.203768	0.327345	0.999616
21475	mse-miR-2797b	miR-2797b	4.21016	0.95533	1.62795	1.66564	0.783876	0.581677	1.08297	0	1.36345	1.78946	-0.979048	-1.75196	0.296898	0.327556	0.999616
39934	piR-hsa-27094	piR-hsa-27094	3.15762	1.91066	3.25589	3.33128	1.56775	0	2.16594	0	1.92364	1.69703	-0.978429	-1.66042	0.316347	0.327862	0.999616
660	cgr-miR-185-5p	miR-185-5p	0	0	0	137.415	145.017	239.069	0	172.113	86.7018	2.062	0.976899	2.01436	4.04002	0.328619	0.999616
28646	efu-mir-9201a-5	mir-9201a-5	2.10508	0	0	0	1.56775	1.16335	2.16594	3.85327	1.35692	1.98144	0.976693	1.93526	3.82447	0.328721	0.999616
19199	hsa-miR-4649-3p	miR-4649-3p	1.05254	0	6.51179	4.1641	1.56775	0.581677	0	1.28442	1.89528	1.78769	-0.974762	-1.74258	0.298836	0.329678	0.999616
18560	hbv-miR-B26-5p	miR-B26-5p	7.36778	0	1.62795	0	1.56775	0	0	0	1.32043	2.37881	-0.972842	-2.3142	0.201074	0.330632	0.999616
4984	efu-miR-9354-5p	miR-9354-5p	3.15762	20.0619	1.62795	14.9908	18.813	16.8686	2.16594	59.0834	17.0962	1.29969	0.972063	1.26338	2.40058	0.331019	0.999616
38817	piR-hsa-12865	piR-hsa-12865	4.21016	3.82132	0	0.83282	0	1.16335	1.08297	0	1.38883	1.98251	-0.971681	-1.92637	0.26309	0.331209	0.999616
648	cgr-miR-149-3p	miR-149-3p	8.42032	1.91066	4.88384	2.49846	2.35163	1.16335	2.16594	1.28442	3.08483	1.37929	-0.970786	-1.339	0.395296	0.331655	0.999616
29213	ola-mir-103-2	mir-103-2	0	2.86599	0	0	2.35163	2.32671	1.08297	5.13769	1.72062	1.89111	0.970686	1.83567	3.56937	0.331705	0.999616
19455	hsa-miR-6744-5p	miR-6744-5p	2.10508	1.91066	4.88384	0.83282	1.56775	0	0	1.28442	1.57307	1.8323	-0.97002	-1.77737	0.291714	0.332036	0.999616
15203	cme-MIR319d	MIR319d	1.05254	0	0	0.83282	0.783876	0	5.41484	2.56885	1.33162	2.07443	0.969343	2.01084	4.03016	0.332374	0.999616
15563	cte-mir-125	mir-125	1.05254	1.91066	4.88384	0.83282	1.56775	0.581677	0	0	1.35366	1.89487	-0.968759	-1.83568	0.28016	0.332666	0.999616
19703	hsa-mir-3653	mir-3653	1.05254	0.95533	0	2.49846	3.91938	3.49006	2.16594	3.85327	2.24187	1.53971	0.96787	1.49024	2.80936	0.333109	0.999616
40778	ACA41	1	2.10508	3.82132	3.25589	4.99692	2.35163	0.581677	2.16594	0	2.40981	1.51846	-0.966509	-1.4676	0.361583	0.33379	0.999616
21406	mmu-mir-7029	mir-7029	1.05254	1.91066	6.51179	1.66564	0.783876	0.581677	2.16594	0	1.83401	1.67675	-0.964023	-1.61643	0.326142	0.335034	0.999616
20229	lgi-miR-1992-3p	miR-1992-3p	1.05254	2.86599	0	0	3.1355	4.07174	0	6.42211	2.19349	1.81456	0.963914	1.74908	3.36144	0.335089	0.999616
26328	xtr-mir-148a	mir-148a	1.05254	0.95533	1.62795	0.83282	0	4.65342	2.16594	6.42211	2.21376	1.64817	0.963749	1.58842	3.00719	0.335172	0.999616
23777	ppy-miR-4637-5p	miR-4637-5p	0	5.73198	4.88384	0.83282	0.783876	0	0	2.56885	1.85017	1.93466	-0.962845	-1.86278	0.274946	0.335625	0.999616
6271	hsa-mir-4277	mir-4277	0	1.91066	0	9.99384	0	1.74503	0	1.28442	1.86674	2.05932	-0.961412	-1.97985	0.253516	0.336345	0.999616
2257	mmu-mir-376b	mir-376b	1.05254	0.95533	0	0.83282	0.783876	1.16335	8.66375	0	1.68146	1.87848	0.960622	1.80451	3.4931	0.336742	0.999616
15314	cqu-mir-87	mir-87	1.05254	1.91066	1.62795	1.66564	2.35163	6.98013	5.41484	1.28442	2.78598	1.43194	0.960332	1.37514	2.59393	0.336888	0.999616
12364	ath-MIR319c	MIR319c	4.21016	3.82132	3.25589	4.1641	6.271	6.39845	3.2489	19.2663	6.32952	1.21512	0.960232	1.1668	2.24513	0.336939	0.999616
36741	piR-hsa-30821	piR-hsa-30821	1.05254	1.91066	6.51179	0.83282	0	0.581677	0	2.56885	1.68229	1.84639	-0.95952	-1.77165	0.292874	0.337297	0.999616
29776	eca-mir-8935-2	mir-8935-2	1.05254	1.91066	4.88384	2.49846	1.56775	0.581677	1.08297	0	1.69724	1.67523	-0.959038	-1.60661	0.328368	0.337539	0.999616
17131	esi-MIR8623a	MIR8623a	5.2627	3.82132	8.13973	1.66564	1.56775	2.90839	0	2.56885	3.2418	1.43943	-0.957037	-1.37759	0.384861	0.338548	0.999616
15562	cte-mir-12	mir-12	2.10508	0	0	0.83282	2.35163	1.16335	0	7.70654	1.76993	1.92731	0.957032	1.84449	3.59127	0.338551	0.999616
13261	bmo-miR-3211-5p	miR-3211-5p	0	1.91066	6.51179	0.83282	0.783876	0.581677	1.08297	0	1.46297	1.90375	-0.955961	-1.81991	0.283238	0.339092	0.999616
23995	prd-mir-5360	mir-5360	3.15762	9.5533	3.25589	13.3251	10.9743	15.1236	6.49781	32.1106	11.7498	1.17159	0.955314	1.11924	2.17232	0.339419	0.999616
32164	piR-hsa-11422	piR-hsa-11422	0	7.64264	0	1.66564	3.1355	1.74503	17.3275	5.13769	4.58175	1.57326	0.954753	1.50208	2.83251	0.339703	0.999616
14381	ccr-miR-7133-3p	miR-7133-3p	0	0	3.25589	0	2.35163	2.90839	4.33187	0	1.60597	2.08251	0.954399	1.98755	3.96562	0.339882	0.999616
24177	ptc-MIR6425a-5p	MIR6425a-5p	1.05254	2.86599	4.88384	6.66256	0.783876	1.16335	0	3.85327	2.65818	1.54221	-0.953763	-1.4709	0.360756	0.340203	0.999616
12843	bdi-MIR7766-5p	MIR7766-5p	1.05254	0	1.62795	0.83282	3.91938	0.581677	2.16594	3.85327	1.7542	1.71308	0.953386	1.63323	3.10206	0.340395	0.999616
21213	mmu-miR-6979-5p	miR-6979-5p	2.10508	6.68731	0	0.83282	1.56775	0	1.08297	0	1.53449	1.97451	-0.952771	-1.88125	0.271448	0.340706	0.999616
40393	piR-hsa-5762	piR-hsa-5762	3.15762	2.86599	4.88384	0.83282	1.56775	0	2.16594	0	1.93424	1.72919	-0.95265	-1.64731	0.319235	0.340767	0.999616
20285	lja-MIR7526b	MIR7526b	9.47286	0.95533	0	0	0.783876	11.0519	10.8297	7.70654	5.10002	1.60511	0.952384	1.52868	2.88523	0.340902	0.999616
28666	xtr-miR-26-2-5p	miR-26-2-5p	2.10508	1.91066	3.25589	1.66564	6.271	5.81677	3.2489	5.13769	3.67646	1.29444	0.951434	1.23157	2.34823	0.341384	0.999616
26739	bra-MIR395b	MIR395b	1.05254	0.95533	3.25589	4.99692	2.35163	0.581677	0	0	1.64925	1.80637	-0.950443	-1.71685	0.304213	0.341887	0.999616
16980	efu-mir-1193	mir-1193	0	0	3.25589	3.33128	3.1355	4.07174	3.2489	7.70654	3.09373	1.56237	0.950123	1.48445	2.7981	0.34205	0.999616
16982	efu-mir-129a	mir-129a	0	4.77665	4.88384	0	0	0	0	2.56885	1.52867	2.31615	-0.947721	-2.19506	0.218384	0.343271	0.999616
110	aca-miR-202-5p	miR-202-5p	3.15762	1.91066	1.62795	2.49846	4.70325	6.39845	6.49781	3.85327	3.83093	1.28128	0.947474	1.21398	2.31977	0.343397	0.999616
19453	hsa-miR-6741-3p	miR-6741-3p	1.05254	2.86599	1.62795	2.49846	0.783876	0.581677	1.08297	0	1.31168	1.78679	-0.946822	-1.69177	0.309547	0.343729	0.999616
21354	mmu-mir-5135	mir-5135	2.10508	6.68731	3.25589	0	0.783876	0.581677	0	2.56885	1.99783	1.76749	-0.946766	-1.6734	0.313514	0.343758	0.999616
27708	mcmv-mir-m88-1	#NAME?	4.21016	11.464	8.13973	8.3282	13.3259	6.98013	9.74671	38.5327	12.5909	1.14226	0.946546	1.0812	2.1158	0.34387	0.999616
8821	zma-MIR159b	MIR159b	2.10508	1.91066	0	5.82974	0.783876	1.16335	1.08297	0	1.60946	1.78473	-0.942775	-1.6826	0.311521	0.345796	0.999616
24044	pta-MIR396	MIR396	0	0.95533	1.62795	1.66564	2.35163	1.74503	5.41484	2.56885	2.04116	1.60131	0.942432	1.50913	2.84638	0.345972	0.999616
22889	osa-MIR812n	MIR812n	0	0	0	2.49846	2.35163	1.74503	6.49781	0	1.63662	2.05022	0.9423	1.93192	3.81564	0.346039	0.999616
9640	dre-miR-190b-3p	miR-190b-3p	63.1524	34.3919	26.0471	11.6595	36.8422	37.809	116.961	80.9186	50.9727	1.0714	0.941731	1.00897	2.01248	0.34633	0.999616
14659	cfa-miR-8806-3p	miR-8806-3p	0	7.64264	0	1.66564	0	0	0	2.56885	1.48464	2.32319	-0.941527	-2.18735	0.219555	0.346435	0.999616
32255	piR-hsa-11733	piR-hsa-11733	1.05254	13.3746	3.25589	3.33128	1.56775	2.32671	40.0698	8.99096	9.2462	1.39618	0.941288	1.3142	2.48665	0.346557	0.999616
21834	mtr-MIR5295b	MIR5295b	13.683	6.68731	9.76768	0.83282	3.1355	0.581677	4.33187	5.13769	5.5197	1.33562	-0.940441	-1.25607	0.418683	0.346991	0.999616
27805	mml-mir-1284	mir-1284	5.2627	12.4193	6.51179	3.33128	5.48713	3.49006	23.8253	28.2573	11.0731	1.20966	0.939537	1.13652	2.19851	0.347455	0.999616
18258	gma-MIR9726-3p	MIR9726-3p	1.05254	1.91066	3.25589	0.83282	2.35163	0.581677	8.66375	6.42211	3.13388	1.46614	0.938212	1.37555	2.59468	0.348136	0.999616
33462	piR-hsa-16145	piR-hsa-16145	18.9457	16.2406	9.76768	5.82974	20.3808	8.72516	54.1484	21.8352	19.4842	1.11376	0.93735	1.04398	2.06191	0.348579	0.999616
1487	mmu-miR-341-5p	miR-341-5p	96.8336	81.203	65.1179	79.9508	0	67.4746	0	51.3769	55.2446	1.5404	-0.936136	-1.44202	0.368051	0.349203	0.999616
8456	smo-MIR1097	MIR1097	2.10508	5.73198	1.62795	0.83282	0	0	2.16594	1.28442	1.71852	1.82384	-0.935947	-1.70702	0.306292	0.349301	0.999616
5538	ggo-mir-296	mir-296	0	0	0	52.4677	0	48.2792	62.8122	77.0654	30.0781	1.9613	0.934717	1.83326	3.56341	0.349934	0.999616
16043	dps-miR-959-5p	miR-959-5p	1.05254	5.73198	3.25589	2.49846	1.56775	2.32671	0	0	2.05417	1.67681	-0.934677	-1.56727	0.337445	0.349955	0.999616
2057	mmu-miR-741-3p	miR-741-3p	11.5779	31.5259	13.0236	31.6472	37.626	88.9966	29.2401	20.5508	33.0235	1.07645	0.934527	1.00597	2.0083	0.350032	0.999616
1022	ggo-mir-152	mir-152	5.2627	1.91066	1.62795	2.49846	2.35163	1.16335	0	0	1.85184	1.70486	-0.934434	-1.59308	0.331463	0.35008	0.999616
30903	piR-hsa-1077	piR-hsa-1077	1.05254	4.77665	3.25589	3.33128	5.48713	2.32671	1.08297	21.8352	5.39354	1.37404	0.933198	1.28225	2.43218	0.350718	0.999616
22556	osa-MIR164b-3p	MIR164b-3p	0	1.91066	3.25589	3.33128	0.783876	0.581677	1.08297	0	1.36829	1.8755	-0.932833	-1.74953	0.297398	0.350906	0.999616
32056	piR-hsa-11041	piR-hsa-11041	2.10508	0.95533	1.62795	0.83282	1.56775	2.32671	6.49781	3.85327	2.47084	1.4712	0.932271	1.37156	2.58749	0.351196	0.999616
11682	aga-mir-92a	mir-92a	2.10508	4.77665	3.25589	3.33128	0.783876	0.581677	0	3.85327	2.33597	1.5652	-0.932039	-1.45883	0.363789	0.351317	0.999616
5900	hco-mir-79	mir-79	3.15762	0.95533	6.51179	0	0.783876	1.16335	1.08297	0	1.70687	1.82185	-0.931297	-1.69668	0.308495	0.3517	0.999616
32026	piR-hsa-1092	piR-hsa-1092	0	1.91066	4.88384	1.66564	0	0	0	2.56885	1.37862	2.16349	-0.930547	-2.01323	0.247718	0.352088	0.999616
4672	eca-miR-8912-5p	miR-8912-5p	2.10508	1.91066	1.62795	3.33128	0.783876	1.74503	0	0	1.43798	1.80613	-0.93043	-1.68048	0.31198	0.352149	0.999616
6138	hsa-miR-6724-1-5p	miR-6724-1-5p	2.10508	11.464	6.51179	11.6595	7.83876	15.1236	31.4061	12.8442	12.3691	1.15112	0.930408	1.07101	2.1009	0.35216	0.999616
20276	lja-MIR7517	MIR7517	4.21016	0.95533	3.25589	1.66564	11.7581	3.49006	5.41484	2.56885	4.16486	1.32796	0.930259	1.23535	2.35438	0.352237	0.999616
22373	odi-mir-1502	mir-1502	0	0.95533	8.13973	0	0	0	1.08297	1.28442	1.43281	2.23178	-0.929317	-2.07403	0.237495	0.352725	0.999616
25079	sma-miR-8442-3p	miR-8442-3p	0	1.91066	6.51179	0.83282	0.783876	0.581677	0	1.28442	1.48816	1.89938	-0.929298	-1.76509	0.294209	0.352735	0.999616
20477	mdm-MIR398a	MIR398a	1.05254	7.64264	0	1.66564	1.56775	0.581677	20.5764	6.42211	4.93859	1.5519	0.928563	1.44104	2.71516	0.353115	0.999616
20345	lus-MIR171h	MIR171h	3.15762	5.73198	3.25589	3.33128	3.1355	0.581677	2.16594	0	2.66999	1.48789	-0.927829	-1.38051	0.384084	0.353496	0.999616
16754	eca-mir-9155	mir-9155	0	6.68731	0	4.1641	0	1.74503	1.08297	0	1.70993	2.04723	-0.927777	-1.89937	0.26806	0.353523	0.999616
34937	piR-hsa-22817	piR-hsa-22817	10.5254	0	14.6515	9.99384	47.0325	9.88851	8.66375	15.4131	14.5211	1.3114	0.927501	1.21632	2.32354	0.353667	0.999616
20499	mdm-MIR7121g	MIR7121g	2.10508	4.77665	1.62795	2.49846	0.783876	1.74503	0	1.28442	1.85268	1.61946	-0.9272	-1.50156	0.35317	0.353823	0.999616
11695	age-miR-508-5p	miR-508-5p	1.05254	4.77665	3.25589	4.99692	6.271	5.81677	4.33187	15.4131	5.73934	1.2435	0.927198	1.15297	2.22371	0.353824	0.999616
14072	bta-mir-4449	mir-4449	3.15762	1.91066	4.88384	0	0.783876	0	1.08297	1.28442	1.63792	1.84148	-0.926822	-1.70672	0.306356	0.354019	0.999616
34291	piR-hsa-19793	piR-hsa-19793	0	1.91066	0	0	2.35163	1.16335	0	5.13769	1.32042	2.15183	0.926442	1.99354	3.98213	0.354217	0.999616
7595	osa-MIR5537-3p	MIR5537-3p	2.10508	1.91066	3.25589	0.83282	6.271	2.90839	4.33187	5.13769	3.34418	1.34099	0.925692	1.24134	2.36418	0.354606	0.999616
29023	hhi-miR-26-2-5p	miR-26-2-5p	5.2627	3.82132	1.62795	4.1641	1.56775	1.16335	2.16594	1.28442	2.63219	1.40172	-0.924961	-1.29654	0.407102	0.354986	0.999616
31064	piR-hsa-7201	piR-hsa-7201	5.2627	7.64264	1.62795	0.83282	6.271	4.07174	10.8297	14.1286	6.3334	1.26905	0.924759	1.17357	2.25569	0.355091	0.999616
40806	U18C		18.9457	12.4193	16.2795	17.4892	7.83876	9.88851	6.49781	8.99096	12.2937	1.04932	-0.923227	-0.96876	0.510945	0.355889	0.999616
35055	piR-hsa-23232	piR-hsa-23232	8.42032	9.5533	1.62795	5.82974	3.91938	1.74503	4.33187	1.28442	4.589	1.28826	-0.92196	-1.18772	0.438996	0.35655	0.999616
13285	bmo-miR-3245-3p	miR-3245-3p	1.05254	5.73198	3.25589	4.1641	1.56775	0.581677	1.08297	2.56885	2.50072	1.46422	-0.921764	-1.34966	0.392384	0.356652	0.999616
281	bta-let-7d-3p	let-7d-3p	1383.04	1410.07	0	1151.79	922.622	0	0	0	608.439	2.27502	-0.921327	-2.09604	0.233899	0.35688	0.999616
14674	cfa-miR-8836-5p	miR-8836-5p	6.31524	13.3746	0	19.1549	18.0291	10.4702	1.08297	68.0744	17.0627	1.42209	0.920681	1.30929	2.4782	0.357217	0.999616
21819	mtr-MIR5285c	MIR5285c	3.15762	7.64264	3.25589	5.82974	1.56775	6.98013	35.738	2.56885	8.34257	1.3247	0.92021	1.21901	2.32786	0.357463	0.999616
16799	efu-miR-324-5p	miR-324-5p	3.15762	0.95533	0	0	2.35163	5.81677	0	5.13769	2.17738	1.82352	0.919127	1.67605	3.19552	0.358029	0.999616
30138	rno-miR-6317-2-3p	miR-6317-2-3p	0	3.82132	0	0	3.1355	3.49006	3.2489	2.56885	2.03308	1.79536	0.918694	1.64938	3.137	0.358256	0.999616
1505	mmu-miR-3473d-3p	miR-3473d-3p	3.15762	4.77665	6.51179	2.49846	0	3.49006	0	2.56885	2.87543	1.57656	-0.91653	-1.44496	0.367302	0.359389	0.999616
25942	tcc-MIR169c-3p	MIR169c-3p	15.7881	31.5259	0	0.83282	0	0	14.0786	0	7.77817	1.96023	-0.915793	-1.79517	0.288138	0.359775	0.999616
22080	nvi-mir-928	mir-928	4.21016	2.86599	1.62795	3.33128	0	0.581677	0	3.85327	2.05879	1.71291	-0.915478	-1.56813	0.337245	0.359941	0.999616
3833	bta-mir-2413	mir-2413	6.31524	0.95533	0	4.1641	1.56775	0	1.08297	1.28442	1.92123	1.76691	-0.912893	-1.613	0.326919	0.361299	0.999616
40096	piR-hsa-29726	piR-hsa-29726	4.21016	0	1.62795	0	0.783876	2.32671	9.74671	3.85327	2.81858	1.68381	0.911564	1.5349	2.89769	0.361998	0.999616
25578	str-miR-8384-3p	miR-8384-3p	0	1.91066	0	0	0.783876	0	5.41484	2.56885	1.33478	2.19758	0.911124	2.00226	4.00628	0.36223	0.999616
12087	ame-mir-971	mir-971	3.15762	0	0	0.83282	3.1355	2.90839	3.2489	2.56885	1.98151	1.68326	0.911071	1.53357	2.89501	0.362258	0.999616
2159	mmu-mir-10a	mir-10a	3.15762	3.82132	0	1.66564	4.70325	3.49006	5.41484	7.70654	3.74491	1.36778	0.910528	1.2454	2.37084	0.362544	0.999616
15128	cin-mir-4109	mir-4109	1.05254	4.77665	3.25589	4.1641	6.271	4.07174	8.66375	10.2754	5.31638	1.23454	0.910098	1.12355	2.17883	0.362771	0.999616
29594	cel-miR-2217b-2-3p	miR-2217b-2-3p	2.10508	0.95533	0	0	1.56775	0.581677	5.41484	2.56885	1.64919	1.82489	0.909752	1.6602	3.1606	0.362953	0.999616
17841	ggo-mir-454	mir-454	36.8389	0	65.1179	0	25.8679	0	0	0	15.9781	2.16642	-0.908263	-1.96768	0.255663	0.363739	0.999616
14784	cgr-miR-1271-3p	miR-1271-3p	0	2.86599	4.88384	1.66564	2.35163	0	0	0	1.47089	2.10027	-0.906633	-1.90417	0.26717	0.364601	0.999616
15311	cqu-mir-316	mir-316	2.10508	1.91066	1.62795	1.66564	3.91938	1.74503	5.41484	6.42211	3.10134	1.36214	0.905249	1.23307	2.35067	0.365334	0.999616
37241	piR-hsa-396	piR-hsa-396	16.8406	10.5086	9.76768	14.1579	8.62263	8.14348	6.49781	0	9.31735	1.23871	-0.905134	-1.1212	0.459711	0.365394	0.999616
15129	cin-mir-4110	mir-4110	1.05254	0	1.62795	0	1.56775	0	4.33187	2.56885	1.39362	2.03747	0.905122	1.84416	3.59043	0.365401	0.999616
5905	hhi-miR-23a-3p	miR-23a-3p	0	0	237.68	0	331.579	250.121	0	324.959	143.042	2.14037	0.903847	1.93457	3.82264	0.366077	0.999616
26148	tur-miR-5738-5p	miR-5738-5p	1.05254	12.4193	0	0.83282	1.56775	2.32671	28.1572	6.42211	6.5973	1.54232	0.902628	1.39214	2.62467	0.366724	0.999616
10402	lus-MIR394a	MIR394a	7.36778	2.86599	0	7.49538	0	3.49006	0	2.56885	2.97351	1.71702	-0.902283	-1.54924	0.341689	0.366906	0.999616
14114	cbn-miR-35n-5p	miR-35n-5p	0	5.73198	4.88384	4.1641	5.48713	11.0519	7.58078	8.99096	5.98633	1.29827	0.901349	1.17019	2.25042	0.367403	0.999616
37723	piR-hsa-6007	piR-hsa-6007	4.21016	5.73198	3.25589	8.3282	1.56775	3.49006	3.2489	1.28442	3.88967	1.2899	-0.901102	-1.16233	0.446789	0.367534	0.999616
1538	mmu-miR-380-5p	miR-380-5p	29.4711	31.5259	0	26.6503	42.3293	50.6059	54.1484	41.1015	34.479	1.2175	0.899456	1.09509	2.13626	0.36841	0.999616
21578	mtr-MIR2590d	MIR2590d	0	0.95533	0	0.83282	0	0	1.08297	7.70654	1.32221	2.26295	0.899342	2.03517	4.0987	0.368471	0.999616
32437	piR-hsa-12441	piR-hsa-12441	0	7.64264	24.4192	1.66564	0.783876	0	8.66375	2.56885	5.71799	1.66742	-0.899205	-1.49936	0.353711	0.368543	0.999616
863	eca-miR-194-1-3p	miR-194-1-3p	3.15762	6.68731	3.25589	0	0	1.16335	2.16594	1.28442	2.21432	1.70575	-0.899079	-1.53361	0.345413	0.36861	0.999616
5872	hco-miR-5941-3p	miR-5941-3p	0	1.91066	0	3.33128	2.35163	0	2.16594	12.8442	2.82547	1.8117	0.898481	1.62778	3.09037	0.368929	0.999616
4244	chi-mir-2331	mir-2331	0	2.86599	8.13973	0	0.783876	0	2.16594	0	1.74444	2.10382	-0.898097	-1.88944	0.269912	0.369134	0.999616
6818	mmu-miR-6238-3p	miR-6238-3p	9.47286	72.6051	4.88384	55.799	35.2744	50.0242	21.6594	204.223	56.7427	1.2445	0.897737	1.11724	2.16931	0.369326	0.999616
19761	hsa-mir-4473	mir-4473	7.36778	1.91066	16.2795	0.83282	3.91938	1.16335	2.16594	3.85327	4.68658	1.37576	-0.895073	-1.23141	0.425902	0.370748	0.999616
25121	sma-mir-8451	mir-8451	0	0	3.25589	0	0.783876	1.16335	0	7.70654	1.61371	2.16425	0.894149	1.93517	3.82422	0.371242	0.999616
17917	ghr-MIR7507-3p	MIR7507-3p	1.05254	0.95533	1.62795	0.83282	0.783876	4.07174	5.41484	1.28442	2.00294	1.58155	0.893696	1.41342	2.66368	0.371485	0.999616
20313	lus-MIR156i	MIR156i	0	1.91066	0	1.66564	2.35163	0.581677	1.08297	7.70654	1.91239	1.77908	0.891991	1.58693	3.00409	0.372398	0.999616
18233	gma-MIR5774a	MIR5774a	2.10508	0.95533	0	3.33128	0.783876	1.16335	3.2489	12.8442	3.05401	1.57088	0.890636	1.39908	2.63734	0.373125	0.999616
14726	cfa-miR-99a-1-3p	miR-99a-1-3p	2.10508	6.68731	1.62795	4.99692	7.83876	8.72516	2.16594	15.4131	6.19502	1.25419	0.890024	1.11626	2.16784	0.373453	0.999616
12909	bfl-miR-2066-5p	miR-2066-5p	1.05254	0	8.13973	0	0	1.74503	0	0	1.36716	2.37035	-0.889544	-2.10853	0.231884	0.373711	0.999616
21331	mmu-mir-378b	mir-378b	1.05254	0.95533	1.62795	0	0	0.581677	5.41484	5.13769	1.84625	1.85051	0.889127	1.64533	3.1282	0.373935	0.999616
13521	bmo-mir-3357	mir-3357	0	5.73198	0	3.33128	5.48713	1.74503	2.16594	15.4131	4.2343	1.55935	0.888762	1.38589	2.61334	0.374131	0.999616
3073	aly-MIR4236	MIR4236	2.10508	0.95533	0	0	2.35163	2.32671	2.16594	2.56885	1.55919	1.77803	0.888448	1.57969	2.98905	0.3743	0.999616
17287	gga-miR-1651-3p	miR-1651-3p	0	2.86599	0	0	3.1355	2.32671	0	5.13769	1.68324	2.03315	0.888126	1.80569	3.49596	0.374473	0.999616
35436	piR-hsa-24838	piR-hsa-24838	6.31524	6.68731	4.88384	5.82974	21.1646	5.81677	12.9956	7.70654	8.92496	1.13124	0.887282	1.00373	2.00518	0.374927	0.999616
32234	piR-hsa-11672	piR-hsa-11672	1.05254	0	1.62795	5.82974	3.1355	4.07174	1.08297	14.1286	3.86614	1.52208	0.886923	1.34997	2.54907	0.37512	0.999616
34121	piR-hsa-18972	piR-hsa-18972	1.05254	2.86599	0	0	0.783876	0	8.66375	3.85327	2.15243	1.91064	0.886121	1.69306	3.23342	0.375552	0.999616
15125	cin-mir-4097	mir-4097	2.10508	1.91066	11.3956	0	0.783876	0	3.2489	1.28442	2.59107	1.74579	-0.885021	-1.54506	0.342682	0.376145	0.999616
15226	cme-MIR828	MIR828	4.21016	0.95533	4.88384	0	0	0.581677	0	2.56885	1.64998	1.96476	-0.884877	-1.73858	0.299665	0.376223	0.999616
21853	mtr-MIR5741b	MIR5741b	5.2627	0.95533	3.25589	0	0.783876	1.74503	0	0	1.50035	1.96975	-0.884504	-1.74225	0.298904	0.376424	0.999616
39786	piR-hsa-24864	piR-hsa-24864	0	5.73198	1.62795	7.49538	7.05488	5.81677	5.41484	16.6975	6.22991	1.35206	0.884166	1.19545	2.29016	0.376607	0.999616
36006	piR-hsa-27463	piR-hsa-27463	3.15762	8.59797	14.6515	14.9908	7.05488	5.81677	3.2489	3.85327	7.67146	1.17088	-0.8833	-1.03424	0.488273	0.377074	0.999616
16779	efu-miR-1842-5p	miR-1842-5p	17.8932	36.3025	22.7912	1.66564	0.783876	1.74503	29.2401	1.28442	13.9633	1.42686	-0.88301	-1.25993	0.417563	0.377231	0.999616
27426	gma-MIR4341-3p	MIR4341-3p	1.05254	4.77665	1.62795	1.66564	0.783876	5.2351	4.33187	11.5598	3.87918	1.39641	0.880711	1.22983	2.3454	0.378474	0.999616
22715	osa-MIR397a	MIR397a	3.15762	0.95533	0	0	4.70325	2.32671	2.16594	2.56885	1.98471	1.69633	0.8805	1.49362	2.81594	0.378588	0.999616
31852	piR-hsa-10330	piR-hsa-10330	0	0.95533	6.51179	0.83282	0	0	2.16594	0	1.30823	2.22189	-0.878927	-1.95288	0.258301	0.379441	0.999616
38358	piR-hsa-9016	piR-hsa-9016	0	1.91066	0	0.83282	1.56775	0	3.2489	5.13769	1.58723	1.95718	0.878179	1.71875	3.29152	0.379846	0.999616
38861	piR-hsa-13400	piR-hsa-13400	1.05254	0	1.62795	1.66564	3.1355	2.32671	3.2489	2.56885	1.95326	1.59472	0.878058	1.40026	2.63949	0.379912	0.999616
16515	eca-miR-8929-1-3p	miR-8929-1-3p	2.10508	0.95533	0	0	0.783876	1.74503	3.2489	3.85327	1.58644	1.80895	0.877935	1.58814	3.00662	0.379979	0.999616
21005	mml-mir-3927	mir-3927	1.05254	1.91066	0	0.83282	1.56775	0	6.49781	3.85327	1.96436	1.77672	0.876226	1.55681	2.94203	0.380907	0.999616
33926	piR-hsa-181	piR-hsa-181	0	1.91066	0	0.83282	1.56775	0.581677	3.2489	3.85327	1.49939	1.83861	0.876131	1.61086	3.05434	0.380959	0.999616
23213	ppc-let-7-3p	let-7-3p	2.10508	7.64264	0	0	0.783876	1.74503	0	0	1.53458	2.10581	-0.874491	-1.84151	0.279029	0.381851	0.999616
6258	hsa-mir-3917	mir-3917	1.05254	5.73198	0	3.33128	0.783876	0.581677	2.16594	0	1.70591	1.78559	-0.874017	-1.56064	0.339002	0.382109	0.999616
19775	hsa-mir-4530	mir-4530	2.10508	0.95533	6.51179	0	0.783876	1.74503	0	0	1.51264	1.97837	-0.87077	-1.72271	0.30298	0.38388	0.999616
8631	tca-miR-193-3p	miR-193-3p	0	3.82132	0	0.83282	0	0	18.4105	0	2.88307	2.2203	0.870254	1.93223	3.81644	0.384162	0.999616
27315	gga-miR-1434-5p	miR-1434-5p	2.10508	3.82132	0	0	1.56775	2.90839	6.49781	5.13769	2.75475	1.59686	0.87	1.38926	2.61945	0.3843	0.999616
14515	cel-miR-8209-5p	miR-8209-5p	0	0	6.51179	1.66564	0	0	1.08297	1.28442	1.3181	2.22211	-0.869345	-1.93178	0.262106	0.384659	0.999616
25281	spu-miR-4854-3p	miR-4854-3p	2.10508	0.95533	3.25589	3.33128	8.62263	4.07174	0	10.2754	4.07717	1.44681	0.869041	1.25734	2.39054	0.384825	0.999616
13061	bma-miR-5857-5p	miR-5857-5p	10.5254	1.91066	8.13973	4.99692	1.56775	2.90839	6.49781	0	4.56833	1.38834	-0.868662	-1.206	0.43347	0.385032	0.999616
1012	ggo-miR-598-5p	miR-598-5p	5.2627	2.86599	0	0.83282	0.783876	0	1.08297	1.28442	1.5141	1.86168	-0.868535	-1.61694	0.326027	0.385101	0.999616
24323	ptr-mir-203	mir-203	1.05254	0	0	1.66564	7.05488	1.16335	0	1.28442	1.5276	1.98315	0.868081	1.72153	3.29787	0.38535	0.999616
24832	sbi-MIR5565e	MIR5565e	2.10508	2.86599	1.62795	1.66564	0.783876	2.32671	18.4105	0	3.72321	1.57061	0.867594	1.36266	2.57158	0.385617	0.999616
15202	cme-MIR2111b	MIR2111b	1.05254	8.59797	4.88384	3.33128	1.56775	0.581677	4.33187	1.28442	3.20392	1.42482	-0.866943	-1.23523	0.424774	0.385973	0.999616
774	cgr-mir-708	mir-708	0	99.3543	0	66.6256	126.204	114.009	127.79	52.6613	73.3305	1.54492	0.866579	1.3388	2.52941	0.386173	0.999616
1255	mmu-miR-1291-5p	miR-1291-5p	0	3.82132	1.62795	0	3.91938	3.49006	4.33187	2.56885	2.46993	1.62795	0.866506	1.41063	2.65852	0.386213	0.999616
33979	piR-hsa-18343	piR-hsa-18343	6.31524	10.5086	14.6515	8.3282	3.91938	4.65342	6.49781	5.13769	7.50148	1.12564	-0.866381	-0.975236	0.508657	0.386281	0.999616
40424	piR-hsa-6158	piR-hsa-6158	0	1.91066	0	14.1579	2.35163	1.74503	0	1.28442	2.68121	1.82404	-0.866127	-1.57985	0.334516	0.38642	0.999616
18479	gra-MIR8778	MIR8778	17.8932	21.9726	11.3956	4.99692	34.4905	12.2152	36.8209	24.404	20.5236	1.0824	0.866109	0.937478	1.91518	0.38643	0.999616
18235	gma-MIR5775	MIR5775	4.21016	3.82132	4.88384	0	0.783876	0.581677	3.2489	0	2.19122	1.71267	-0.865587	-1.48246	0.357878	0.386717	0.999616
9515	cpa-MIR535	MIR535	0	0	1.62795	0.83282	0	2.90839	0	5.13769	1.31336	2.19932	0.86551	1.90353	3.74128	0.386759	0.999616
22429	oha-mir-1329	mir-1329	0	10.5086	3.25589	0.83282	1.56775	0.581677	2.16594	1.28442	2.52464	1.62945	-0.865371	-1.41008	0.37629	0.386835	0.999616
19181	hsa-miR-4523-3p	miR-4523-3p	10.5254	0.95533	3.25589	0.83282	2.35163	0	3.2489	0	2.64625	1.71259	-0.865242	-1.48181	0.358041	0.386906	0.999616
2274	mmu-mir-467c	mir-467c	6.31524	0.95533	13.0236	4.99692	3.91938	2.32671	4.33187	0	4.48363	1.40807	-0.864144	-1.21677	0.430244	0.387509	0.999616
21792	mtr-MIR5262-3p	MIR5262-3p	0	0.95533	8.13973	0	1.56775	0.581677	0	0	1.40556	2.19903	-0.863721	-1.89935	0.268065	0.387741	0.999616
35304	piR-hsa-24371	piR-hsa-24371	2.10508	21.0173	3.25589	4.99692	16.4614	9.30684	2.16594	41.1015	12.5514	1.29691	0.863246	1.11956	2.1728	0.388002	0.999616
29150	nve-miR-9456-2-3p	miR-9456-2-3p	4.21016	12.4193	3.25589	15.8236	16.4614	18.032	8.66375	28.2573	13.3904	1.13546	0.863178	0.980105	1.97261	0.38804	0.999616
20287	lja-MIR7528	MIR7528	0	6.68731	0	0.83282	0	7.5618	5.41484	8.99096	3.68597	1.74026	0.862938	1.50174	2.83184	0.388172	0.999616
23506	ppe-MIR399f	MIR399f	5.2627	0	0	0	0	5.81677	12.9956	0	3.00939	2.11828	0.862161	1.8263	3.54625	0.388599	0.999616
19624	hsa-miR-939-5p	miR-939-5p	1.05254	1.91066	0	0	2.35163	4.65342	0	2.56885	1.56714	1.92256	0.862151	1.65753	3.15477	0.388605	0.999616
1968	mmu-miR-704-3p	miR-704-3p	5.2627	5.73198	6.51179	7.49538	0.783876	2.90839	3.2489	5.13769	4.63509	1.25177	-0.861783	-1.07875	0.473437	0.388807	0.999616
39770	piR-hsa-24633	piR-hsa-24633	9.47286	3.82132	6.51179	0.83282	3.91938	0	3.2489	1.28442	3.63644	1.49932	-0.860646	-1.29039	0.408842	0.389433	0.999616
2012	mmu-miR-7081-5p	miR-7081-5p	1.05254	0.95533	0	0.83282	2.35163	0.581677	3.2489	2.56885	1.44897	1.75455	0.860178	1.50923	2.84657	0.389691	0.999616
2497	pma-miR-92a-3p	miR-92a-3p	0	18.1513	0	13.3251	18.0291	20.9404	22.7423	12.8442	13.2541	1.42654	0.859602	1.22625	2.33959	0.390008	0.999616
37325	piR-hsa-4293	piR-hsa-4293	3.15762	4.77665	1.62795	1.66564	0.783876	2.90839	0	0	1.86501	1.71731	-0.859286	-1.47566	0.359569	0.390183	0.999616
39480	piR-hsa-20564	piR-hsa-20564	0	6.68731	3.25589	0.83282	0	0	3.2489	0	1.75312	2.08746	-0.858999	-1.79313	0.288546	0.390341	0.999616
28834	cbr-mir-35b-12	mir-35b-12	16.8406	15.2853	9.76768	5.82974	23.5163	15.1236	30.3231	20.5508	17.1546	1.05414	0.858515	0.904994	1.87254	0.390608	0.999616
6879	mmu-miR-8111-5p	miR-8111-5p	2.10508	0.95533	0	0	1.56775	1.16335	5.41484	1.28442	1.56135	1.82777	0.858183	1.56856	2.96609	0.390791	0.999616
10847	pde-MIR1313-5p	MIR1313-5p	2.10508	0.95533	8.13973	2.49846	0.783876	1.16335	1.08297	2.56885	2.41221	1.49757	-0.857383	-1.28399	0.410657	0.391233	0.999616
34281	piR-hsa-19748	piR-hsa-19748	5.2627	42.0345	3.25589	41.641	48.6003	36.064	9.74671	98.9005	35.6882	1.23598	0.856512	1.05863	2.08296	0.391714	0.999616
16938	efu-miR-9312-3p	miR-9312-3p	0	6.68731	1.62795	1.66564	5.48713	4.65342	2.16594	11.5598	4.2309	1.43479	0.856403	1.22876	2.34366	0.391775	0.999616
4301	cme-MIR160a-5p	MIR160a-5p	2.10508	1.91066	0	1.66564	3.1355	2.32671	0	10.2754	2.67737	1.63224	0.855132	1.39578	2.6313	0.392478	0.999616
3249	ath-MIR405b	MIR405b	2.10508	2.86599	0	0	3.1355	0	5.41484	6.42211	2.49294	1.79165	0.854914	1.5317	2.89127	0.392599	0.999616
33101	piR-hsa-1477	piR-hsa-1477	1.05254	0.95533	4.88384	2.49846	0.783876	0	0	2.56885	1.59286	1.84146	-0.854253	-1.57308	0.336091	0.392965	0.999616
32151	piR-hsa-11369	piR-hsa-11369	5.2627	1.91066	1.62795	0	2.35163	0	0	0	1.39412	2.14434	-0.853693	-1.83061	0.281145	0.393275	0.999616
25616	stu-MIR172a	MIR172a	4.21016	2.86599	8.13973	11.6595	0	6.39845	4.33187	0	4.70071	1.51115	-0.853666	-1.29001	0.408947	0.39329	0.999616
23838	ppy-mir-1293	mir-1293	0	3.82132	4.88384	0.83282	0.783876	1.16335	1.08297	0	1.57102	1.82793	-0.85347	-1.56008	0.339131	0.393398	0.999616
29934	hsa-mir-4283-2	mir-4283-2	1.05254	3.82132	1.62795	2.49846	4.70325	2.32671	0	15.4131	3.93041	1.49999	0.852909	1.27935	2.4273	0.39371	0.999616
29435	age-miR-513a-2-5p	miR-513a-2-5p	1.05254	0.95533	0	0.83282	1.56775	3.49006	0	3.85327	1.46897	1.84152	0.852542	1.56998	2.969	0.393914	0.999616
28993	efu-mir-9279a-2	mir-9279a-2	1.05254	3.82132	1.62795	2.49846	1.56775	0.581677	1.08297	0	1.52908	1.70451	-0.852232	-1.45264	0.365353	0.394085	0.999616
22803	osa-MIR5512a-3p	MIR5512a-3p	0	5.73198	0	1.66564	7.83876	6.39845	0	6.42211	3.50712	1.69306	0.852054	1.44258	2.71807	0.394184	0.999616
7209	oan-miR-103-1-3p	miR-103-1-3p	31.5762	0	0	29.9815	0	0	0	17.9819	9.94245	2.12025	-0.851467	-1.80532	0.286118	0.39451	0.999616
30949	piR-hsa-2117	piR-hsa-2117	104.201	635.294	110.7	451.389	462.487	321.086	107.214	1744.25	492.077	1.19519	0.850771	1.01684	2.02348	0.394897	0.999616
18367	gra-MIR8653b	MIR8653b	0	1.91066	4.88384	0.83282	2.35163	1.16335	4.33187	10.2754	3.21869	1.52517	0.850466	1.29711	2.45736	0.395066	0.999616
1266	mmu-miR-155-3p	miR-155-3p	1.05254	2.86599	3.25589	5.82974	0	2.32671	0	2.56885	2.23746	1.6677	-0.850353	-1.41814	0.374195	0.395129	0.999616
20997	mml-mir-302a	mir-302a	14.7356	4.77665	0	11.6595	0.783876	2.32671	3.2489	7.70654	5.65471	1.40918	-0.849775	-1.19748	0.436035	0.39545	0.999616
24457	rco-MIR156a	MIR156a	0	5.73198	4.88384	1.66564	0.783876	2.32671	1.08297	0	2.05938	1.71531	-0.849706	-1.45751	0.364122	0.395488	0.999616
16216	dre-mir-153b	mir-153b	4.21016	5.73198	13.0236	7.49538	5.48713	1.74503	6.49781	0	5.52388	1.33179	-0.849121	-1.13085	0.456647	0.395814	0.999616
22543	osa-MIR156d	MIR156d	3.15762	13.3746	6.51179	9.16102	17.2453	11.6335	5.41484	29.5417	12.0051	1.14862	0.848852	0.975005	1.96565	0.395964	0.999616
18604	hco-miR-46-3p	miR-46-3p	0	0	3.25589	0	0	0	0	11.5598	1.85196	2.52239	0.848063	2.13914	4.405	0.396403	0.999616
7541	osa-MIR5072-5p	MIR5072-5p	4.21016	4.77665	3.25589	4.99692	14.8936	8.14348	7.58078	3.85327	6.46385	1.17798	0.84797	0.998891	1.99846	0.396455	0.999616
11569	aca-miR-5467-3p	miR-5467-3p	8.42032	5.73198	6.51179	9.99384	3.1355	6.98013	6.49781	47.5236	11.8494	1.23415	0.84777	1.04627	2.06519	0.396566	0.999616
225	aja-miR-29b-3p	miR-29b-3p	0	223.547	0	357.28	398.993	369.365	302.148	450.832	262.771	1.63761	0.847722	1.38824	2.61759	0.396593	0.999616
39522	piR-hsa-21022	piR-hsa-21022	0	15.2853	0	4.1641	1.56775	2.32671	37.9039	8.99096	8.77984	1.6003	0.847581	1.35638	2.56042	0.396672	0.999616
1078	hsa-miR-138-1-3p	miR-138-1-3p	6.31524	5.73198	6.51179	4.99692	10.9743	15.1236	10.8297	7.70654	8.52375	1.10193	0.84727	0.933628	1.91007	0.396845	0.999616
19826	hsa-mir-4786	mir-4786	1.05254	0	0	1.66564	0.783876	2.32671	4.33187	1.28442	1.43063	1.85092	0.847247	1.56819	2.96532	0.396858	0.999616
22328	odi-miR-1478-5p	miR-1478-5p	1.05254	0.95533	1.62795	0.83282	3.91938	1.16335	6.49781	0	2.00615	1.66112	0.847019	1.407	2.65185	0.396984	0.999616
20661	mdo-mir-551b	mir-551b	8.42032	14.3299	14.6515	0.83282	7.05488	4.07174	4.33187	2.56885	7.03274	1.2572	-0.845404	-1.06284	0.478688	0.397885	0.999616
8402	sly-MIR9474	MIR9474	6.31524	7.64264	0	0.83282	7.05488	3.49006	14.0786	8.99096	6.05065	1.36337	0.844597	1.1515	2.22144	0.398336	0.999616
13130	bma-mir-86	mir-86	0	2.86599	0	0	2.35163	0.581677	5.41484	1.28442	1.56232	1.96334	0.8445	1.65804	3.15587	0.39839	0.999616
13219	bmo-miR-2809-5p	miR-2809-5p	1.05254	8.59797	1.62795	4.1641	0.783876	1.16335	1.08297	3.85327	2.79075	1.47084	-0.844451	-1.24205	0.42277	0.398418	0.999616
15106	cin-mir-4016-1	mir-4016-1	0	3.82132	4.88384	0.83282	0	1.74503	1.08297	0	1.54575	1.95088	-0.843741	-1.64603	0.319517	0.398814	0.999616
30962	piR-hsa-23574	piR-hsa-23574	7.36778	0	9.76768	8.3282	11.7581	12.2152	10.8297	17.9819	9.78108	1.25867	0.842808	1.06082	2.08611	0.399336	0.999616
6444	hvt-miR-H13-5p	miR-H13-5p	1.05254	1.91066	0	1.66564	1.56775	2.32671	3.2489	5.13769	2.11374	1.55504	0.842558	1.31021	2.47978	0.399476	0.999616
1923	mmu-miR-7009-5p	miR-7009-5p	9.47286	6.68731	14.6515	8.3282	3.91938	1.74503	5.41484	8.99096	7.40126	1.16828	-0.842136	-0.983848	0.505629	0.399712	0.999616
3452	bdi-MIR408	MIR408	0	1.91066	0	0.83282	0.783876	2.32671	4.33187	1.28442	1.43379	1.85039	0.842101	1.55821	2.94489	0.399731	0.999616
2633	sko-miR-4822-3p	miR-4822-3p	4.21016	0	0	1.66564	7.05488	0.581677	4.33187	3.85327	2.71219	1.64449	0.8417	1.38417	2.61021	0.399956	0.999616
8541	ssc-mir-9789	mir-9789	1.05254	0	1.62795	1.66564	3.91938	1.16335	2.16594	3.85327	1.93101	1.62159	0.841223	1.36412	2.57419	0.400223	0.999616
30323	xtr-mir-27c-2	mir-27c-2	9.47286	6.68731	14.6515	9.99384	45.4648	8.72516	7.58078	16.6975	14.9092	1.13355	0.841103	0.953433	1.93648	0.40029	0.999616
23738	ppt-MIR902k	MIR902k	2.10508	1.91066	55.3502	3.33128	3.1355	1.74503	1.08297	20.5508	11.1514	1.48255	-0.841035	-1.24688	0.421359	0.400329	0.999616
29587	cbr-miR-790-2-3p	miR-790-2-3p	9.47286	12.4193	14.6515	10.8267	8.62263	3.49006	9.74671	2.56885	8.97482	1.13095	-0.841006	-0.951134	0.517226	0.400344	0.999616
18275	gma-MIR9754-3p	MIR9754-3p	1.05254	0.95533	0	0.83282	0.783876	1.74503	6.49781	0	1.48343	1.87874	0.840436	1.57896	2.98754	0.400664	0.999616
15569	cte-mir-1997	mir-1997	3.15762	3.82132	1.62795	0	3.91938	4.65342	8.66375	2.56885	3.55153	1.43367	0.840247	1.20463	2.30479	0.40077	0.999616
36552	piR-hsa-29995	piR-hsa-29995	1.05254	0.95533	0	3.33128	3.1355	2.32671	3.2489	5.13769	2.39849	1.51938	0.839744	1.27589	2.42148	0.401052	0.999616
17321	gga-miR-1716-5p	miR-1716-5p	1.05254	2.86599	4.88384	1.66564	0.783876	1.74503	0	1.28442	1.78517	1.64596	-0.839678	-1.38208	0.383666	0.401089	0.999616
126	aca-miR-23a-3p	miR-23a-3p	1.05254	2.86599	8.13973	2.49846	0	1.74503	0	3.85327	2.51938	1.65938	-0.838913	-1.39208	0.381016	0.401518	0.999616
5641	gma-MIR319l	MIR319l	3.15762	10.5086	1.62795	3.33128	3.1355	1.74503	20.5764	15.4131	7.43693	1.31007	0.838828	1.09892	2.14194	0.401566	0.999616
22508	ola-mir-200a	mir-200a	1.05254	0.95533	6.51179	0	0.783876	0.581677	0	1.28442	1.3962	1.94177	-0.838364	-1.62791	0.323556	0.401826	0.999616
1109	hsa-miR-4485-3p	miR-4485-3p	5.2627	5.73198	13.0236	9.99384	3.1355	3.49006	4.33187	6.42211	6.42396	1.16467	-0.838094	-0.9761	0.508352	0.401978	0.999616
6979	mmu-mir-7211	mir-7211	0	1.91066	0	0.83282	1.56775	0	8.66375	0	1.62187	2.13605	0.837485	1.78891	3.45554	0.40232	0.999616
2353	mmu-mir-714	mir-714	30.5236	24.8386	26.0471	27.4831	9.40651	11.6335	21.6594	17.9819	21.1967	1.01547	-0.837275	-0.850227	0.554697	0.402438	0.999616
35762	piR-hsa-26434	piR-hsa-26434	1.05254	6.68731	0	1.66564	2.35163	0.581677	0	0	1.54235	1.94721	-0.837267	-1.63033	0.323013	0.402442	0.999616
31286	piR-hsa-23534	piR-hsa-23534	3.15762	23.8832	9.76768	18.322	20.3808	20.3587	6.49781	62.9367	20.6631	1.18096	0.836878	0.988316	1.98387	0.402661	0.999616
24790	sbi-MIR172e	MIR172e	1.05254	1.91066	1.62795	0.83282	0.783876	2.90839	5.41484	3.85327	2.29804	1.50093	0.836039	1.25483	2.3864	0.403133	0.999616
29606	cfa-miR-8799e-2-5p	miR-8799e-2-5p	1.05254	4.77665	3.25589	1.66564	2.35163	0.581677	1.08297	0	1.84587	1.64104	-0.836037	-1.37197	0.386363	0.403134	0.999616
17682	gga-mir-6544	mir-6544	0	0.95533	0	1.66564	0.783876	1.74503	2.16594	3.85327	1.39614	1.84564	0.835798	1.54258	2.91315	0.403269	0.999616
15450	crt-MIR166b	MIR166b	1.05254	2.86599	6.51179	3.33128	0.783876	0.581677	3.2489	1.28442	2.45756	1.48867	-0.835518	-1.24381	0.422257	0.403426	0.999616
23368	ppc-mir-2236a	mir-2236a	0	0.95533	6.51179	3.33128	2.35163	0	1.08297	0	1.77912	1.91847	-0.835114	-1.60214	0.329387	0.403653	0.999616
10714	oan-mir-1341	mir-1341	0	0.95533	1.62795	0.83282	0	3.49006	1.08297	5.13769	1.64085	1.84998	0.835035	1.5448	2.91763	0.403698	0.999616
15389	crm-miR-67-5p	miR-67-5p	50.5219	2.86599	14.6515	53.3005	1.56775	37.809	14.0786	1.28442	22.01	1.3653	-0.834455	-1.13928	0.453986	0.404025	0.999616
32650	piR-hsa-13094	piR-hsa-13094	26.3135	15.2853	1.62795	3.33128	14.1098	4.65342	57.3973	21.8352	18.0692	1.27294	0.834169	1.06185	2.0876	0.404186	0.999616
20389	lva-miR-92b-1-3p	miR-92b-1-3p	7.36778	2.86599	4.88384	0.83282	1.56775	1.74503	3.2489	0	2.81401	1.49711	-0.833524	-1.24788	0.421067	0.404549	0.999616
15650	dan-mir-314	mir-314	1.05254	0	3.25589	0	3.1355	0.581677	2.16594	5.13769	1.91615	1.78008	0.83343	1.48357	2.7964	0.404602	0.999616
16933	efu-miR-9307-5p	miR-9307-5p	1.05254	0	0	1.66564	1.56775	2.32671	3.2489	1.28442	1.39325	1.82978	0.833187	1.52455	2.87697	0.404739	0.999616
18140	gma-MIR4393b-5p	MIR4393b-5p	16.8406	12.4193	3.25589	0.83282	20.3808	3.49006	23.8253	21.8352	12.86	1.26028	0.832607	1.04932	2.06955	0.405067	0.999616
19955	hsa-mir-6809	mir-6809	1.05254	2.86599	4.88384	0	0	0.581677	2.16594	0	1.44375	1.99788	-0.832453	-1.66314	0.315751	0.405153	0.999616
980	gga-miR-302c-3p	miR-302c-3p	2.10508	2.86599	3.25589	2.49846	4.70325	8.14348	10.8297	0	4.30023	1.39589	0.832332	1.16184	2.23743	0.405222	0.999616
656	cgr-miR-183-3p	miR-183-3p	2079.82	1447.32	0	2201.14	0	0	1496.66	0	903.119	2.32771	-0.83192	-1.93647	0.261256	0.405454	0.999616
16992	efu-mir-215	mir-215	1.05254	4.77665	1.62795	0.83282	0.783876	0	1.08297	1.28442	1.43015	1.79827	-0.831751	-1.49571	0.354606	0.40555	0.999616
1238	mmu-miR-1193-3p	miR-1193-3p	287.343	0.95533	288.146	173.227	0	234.998	0	0	123.084	2.01112	-0.830963	-1.67117	0.313999	0.405995	0.999616
12918	bfl-miR-34e-5p	miR-34e-5p	0	0	4.88384	3.33128	0	0	0	2.56885	1.348	2.35189	-0.830935	-1.95427	0.258052	0.40601	0.999616
12221	asu-miR-5347-5p	miR-5347-5p	1.05254	2.86599	0	1.66564	2.35163	1.16335	11.9127	0	2.62648	1.68761	0.829958	1.40065	2.6402	0.406562	0.999616
31002	piR-hsa-27725	piR-hsa-27725	4.21016	7.64264	4.88384	3.33128	5.48713	8.72516	11.9127	12.8442	7.37963	1.14516	0.829923	0.950397	1.9324	0.406582	0.999616
17827	ggo-mir-375	mir-375	0	4.77665	1.62795	2.49846	0.783876	1.16335	1.08297	0	1.49166	1.8228	-0.829491	-1.512	0.350625	0.406826	0.999616
20329	lus-MIR167a	MIR167a	4.21016	15.2853	11.3956	7.49538	17.2453	20.3587	0	44.9548	15.1181	1.33221	0.828586	1.10385	2.14928	0.407339	0.999616
12751	bdi-MIR5065	MIR5065	0	1.91066	0	0.83282	1.56775	2.32671	3.2489	1.28442	1.39641	1.82924	0.828006	1.51462	2.85724	0.407667	0.999616
30936	piR-hsa-182	piR-hsa-182	10.5254	18.1513	14.6515	32.48	15.6775	19.777	12.9956	98.9005	27.8949	1.1466	0.827479	0.948787	1.93025	0.407966	0.999616
15446	crm-mir-79	mir-79	3.15762	0	0	0	0.783876	1.74503	1.08297	6.42211	1.64895	1.95487	0.827335	1.61733	3.06807	0.408047	0.999616
22583	osa-MIR171b	MIR171b	1.05254	0	6.51179	0.83282	0.783876	0.581677	0	1.28442	1.38089	1.94305	-0.827297	-1.60748	0.328171	0.408069	0.999616
32273	piR-hsa-11812	piR-hsa-11812	4.21016	3.82132	3.25589	2.49846	0.783876	1.74503	3.2489	0	2.44546	1.49618	-0.827226	-1.23768	0.424054	0.408109	0.999616
22878	osa-MIR7693-3p	MIR7693-3p	1.05254	2.86599	0	4.1641	13.3259	2.90839	2.16594	1.28442	3.47091	1.50174	0.826682	1.24146	2.36438	0.408417	0.999616
40691	HBII-52-10	-62	0	0.95533	1.62795	0.83282	1.56775	0	4.33187	3.85327	1.64612	1.84756	0.826053	1.52618	2.88023	0.408774	0.999616
29417	aae-mir-9a-2	mir-9a-2	5.2627	10.5086	6.51179	8.3282	6.271	5.2351	23.8253	24.404	11.2933	1.14695	0.82566	0.946987	1.92784	0.408997	0.999616
1420	mmu-miR-3077-3p	miR-3077-3p	14.7356	6.68731	9.76768	4.99692	2.35163	5.2351	3.2489	7.70654	6.8412	1.17664	-0.825275	-0.971048	0.510135	0.409216	0.999616
2578	rno-miR-466b-1-3p	miR-466b-1-3p	1.05254	0.95533	8.13973	0	1.56775	0.581677	1.08297	0	1.6725	1.86702	-0.824882	-1.54007	0.343869	0.409438	0.999616
27820	mmu-miR-217-3p	miR-217-3p	1.05254	0.95533	0	0	8.62263	0	0	0	1.32881	2.41192	0.824348	1.98826	3.96759	0.409742	0.999616
36274	piR-hsa-28841	piR-hsa-28841	3.15762	0.95533	0	0.83282	0.783876	2.32671	8.66375	1.28442	2.25057	1.6363	0.823967	1.34825	2.54604	0.409958	0.999616
14384	ccr-miR-726-3p	miR-726-3p	18.9457	20.0619	3.25589	12.4923	18.0291	18.032	40.0698	26.9729	19.7325	1.09211	0.823889	0.899781	1.86578	0.410003	0.999616
1180	mdo-let-7a-1	let-7a-1	9.47286	0.95533	11.3956	0.83282	2.35163	2.90839	2.16594	2.56885	4.08143	1.39012	-0.823797	-1.14517	0.452135	0.410055	0.999616
2123	mmu-miR-8098-3p	miR-8098-3p	1.05254	0.95533	3.25589	0	3.1355	1.16335	5.41484	2.56885	2.19329	1.60382	0.822494	1.31913	2.49516	0.410796	0.999616
16126	dpu-mir-275	mir-275	5.2627	2.86599	1.62795	0	0	0	2.16594	1.28442	1.65087	1.9524	-0.821694	-1.60428	0.328901	0.411251	0.999616
887	eca-miR-8991-5p	miR-8991-5p	21.0508	12.4193	37.4428	17.4892	8.62263	12.7969	12.9956	14.1286	17.1182	1.04659	-0.821439	-0.859709	0.551064	0.411396	0.999616
34359	piR-hsa-2011	piR-hsa-2011	1.05254	1.91066	4.88384	1.66564	0	0	1.08297	2.56885	1.64556	1.82054	-0.820961	-1.4946	0.35488	0.411668	0.999616
7850	ppt-MIR1046-3p	MIR1046-3p	1.05254	2.86599	6.51179	6.66256	4.70325	5.81677	16.2445	7.70654	6.4455	1.23552	0.82046	1.0137	2.01908	0.411954	0.999616
1853	mmu-miR-696-3p	miR-696-3p	1.05254	2.86599	3.25589	0.83282	0	0.581677	2.16594	0	1.34436	1.88712	-0.819838	-1.54713	0.34219	0.412309	0.999616
12301	ata-MIR172a	MIR172a	1.05254	0	0	18.322	0.783876	2.32671	0	3.85327	3.2923	1.84799	-0.819504	-1.51444	0.350033	0.412499	0.999616
24347	ptr-mir-492	mir-492	3.15762	9.5533	6.51179	4.1641	0.783876	3.49006	3.2489	3.85327	4.34536	1.28089	-0.819424	-1.04959	0.483104	0.412544	0.999616
4026	cel-mir-71	mir-71	2.10508	1.91066	0	14.9908	0.783876	0.581677	5.41484	1.28442	3.38392	1.59087	-0.819252	-1.30332	0.405192	0.412643	0.999616
11781	aly-MIR390b	MIR390b	3.15762	1.91066	3.25589	0	0	0.581677	1.08297	1.28442	1.40915	1.87902	-0.819097	-1.5391	0.3441	0.412731	0.999616
7967	ppy-mir-1538	mir-1538	2.10508	2.86599	3.25589	0.83282	0	0	2.16594	1.28442	1.56377	1.82631	-0.818631	-1.49508	0.354762	0.412997	0.999616
4842	eca-mir-9001	mir-9001	0	2.86599	8.13973	1.66564	0	0	3.2489	1.28442	2.15059	1.87294	-0.815151	-1.52672	0.347064	0.414986	0.999616
40721	U36A		4.21016	1.91066	0	0.83282	3.1355	4.65342	2.16594	6.42211	2.91633	1.46821	0.814232	1.19546	2.29018	0.415512	0.999616
13636	bra-MIR9564	MIR9564	4.21016	2.86599	4.88384	1.66564	0.783876	0.581677	4.33187	0	2.41538	1.55795	-0.813938	-1.26807	0.415214	0.415681	0.999616
8998	api-mir-3016	mir-3016	2.10508	3.82132	1.62795	0.83282	0.783876	1.16335	1.08297	0	1.42717	1.73351	-0.812529	-1.40853	0.376695	0.416488	0.999616
33220	piR-hsa-1521	piR-hsa-1521	1.05254	0	6.51179	1.66564	1.56775	1.16335	0	0	1.49513	1.95972	-0.812214	-1.59171	0.331779	0.416669	0.999616
30912	piR-hsa-1191	piR-hsa-1191	38.944	115.595	39.0707	117.428	100.336	95.9768	38.9869	346.794	111.641	1.11013	0.81188	0.901295	1.86774	0.416861	0.999616
31000	piR-hsa-27513	piR-hsa-27513	0	0	3.25589	0	2.35163	0.581677	2.16594	2.56885	1.3655	2.02628	0.811484	1.6443	3.12596	0.417088	0.999616
36301	piR-hsa-28957	piR-hsa-28957	1.05254	3.82132	0	3.33128	1.56775	0	0	1.28442	1.38216	1.97616	-0.811242	-1.60314	0.32916	0.417227	0.999616
8981	ame-mir-3749	mir-3749	4.21016	4.77665	0	2.49846	1.56775	1.74503	1.08297	0	1.98513	1.66326	-0.811104	-1.34908	0.392542	0.417306	0.999616
12427	ath-MIR5642b	MIR5642b	0	40.1238	1.62795	0	48.6003	31.4106	34.655	0	19.5522	1.79219	0.81103	1.45352	2.73875	0.417348	0.999616
1949	mmu-miR-7029-5p	miR-7029-5p	3.15762	0.95533	3.25589	2.49846	0	0.581677	2.16594	1.28442	1.73742	1.66914	-0.809972	-1.35196	0.391761	0.417957	0.999616
2955	aca-miR-20a-3p	miR-20a-3p	16.8406	3.82132	9.76768	0	0	7.5618	0	3.85327	5.23059	1.71327	-0.80927	-1.38649	0.382493	0.41836	0.999616
10689	nvi-mir-125	mir-125	0	0	0	4.1641	1.56775	3.49006	2.16594	5.13769	2.06569	1.80492	0.80891	1.46002	2.75112	0.418567	0.999616
38675	piR-hsa-11176	piR-hsa-11176	2.10508	0.95533	3.25589	4.1641	1.56775	0	0	2.56885	1.82712	1.74734	-0.808562	-1.41283	0.375574	0.418767	0.999616
38515	piR-hsa-9710	piR-hsa-9710	0	4.77665	1.62795	1.66564	2.35163	4.07174	3.2489	8.99096	3.34168	1.4563	0.808458	1.17736	2.26162	0.418827	0.999616
2476	pma-miR-204-5p	miR-204-5p	1.05254	0	0	28.3159	0.783876	30.2472	1.08297	47.5236	13.6258	1.75752	0.807775	1.41968	2.67526	0.41922	0.999616
1317	mmu-miR-1955-3p	miR-1955-3p	2.10508	3.82132	0	2.49846	0.783876	1.16335	1.08297	0	1.43188	1.80004	-0.807619	-1.45374	0.365073	0.41931	0.999616
12997	bfl-mir-4901	mir-4901	4.21016	4.77665	1.62795	0	2.35163	1.16335	0	0	1.76622	1.87116	-0.807374	-1.51073	0.350935	0.419451	0.999616
8581	stu-MIR8005a	MIR8005a	4.21016	0	4.88384	3.33128	0.783876	1.74503	2.16594	0	2.14002	1.67379	-0.807366	-1.35136	0.391923	0.419456	0.999616
1857	mmu-miR-6961-5p	miR-6961-5p	0	0	1.62795	2.49846	3.1355	5.2351	1.08297	1.28442	1.85805	1.75561	0.807163	1.41706	2.67041	0.419573	0.999616
5749	gra-MIR7484k	MIR7484k	2.10508	0	4.88384	1.66564	1.56775	0	0	1.28442	1.43834	1.98022	-0.807132	-1.5983	0.330267	0.41959	0.999616
741	cgr-miR-744-3p	miR-744-3p	129.462	91.7116	0	0	0	0	0	62.9367	35.5138	2.25848	-0.805994	-1.82032	0.283158	0.420246	0.999616
40890	HBII-85-27	-112	4.21016	6.68731	3.25589	0	2.35163	1.16335	1.08297	1.28442	2.50447	1.55504	-0.805953	-1.25329	0.419492	0.42027	0.999616
3957	ccr-miR-26a-5p	miR-26a-5p	0	0	1.62795	2.49846	2.35163	3.49006	1.08297	3.85327	1.86304	1.72843	0.805536	1.39231	2.62499	0.420511	0.999616
39988	piR-hsa-28061	piR-hsa-28061	0	3.82132	3.25589	0.83282	3.91938	1.74503	0	14.1286	3.46289	1.64656	0.805172	1.32577	2.50666	0.42072	0.999616
20367	lus-MIR399g	MIR399g	6.31524	2.86599	3.25589	1.66564	2.35163	0.581677	2.16594	1.28442	2.5608	1.43579	-0.804911	-1.15569	0.448852	0.420871	0.999616
30354	hsa-let-7a-1-5p	let-7a-1-5p	0	1.91066	1.62795	0	0.783876	0.581677	3.2489	5.13769	1.66134	1.84461	0.803344	1.48185	2.79308	0.421776	0.999616
30722	mmu-let-7a-1-5p	let-7a-1-5p	0	1.91066	1.62795	0	0.783876	0.581677	3.2489	5.13769	1.66134	1.84461	0.803344	1.48185	2.79308	0.421776	0.999616
38690	piR-hsa-11361	piR-hsa-11361	0	1.91066	1.62795	0	0.783876	0.581677	3.2489	5.13769	1.66134	1.84461	0.803344	1.48185	2.79308	0.421776	0.999616
17566	gga-mir-1571	mir-1571	2.10508	0	0	1.66564	0	2.90839	4.33187	3.85327	1.85803	1.84664	0.803142	1.48312	2.79552	0.421893	0.999616
26236	vvi-MIR3640-3p	MIR3640-3p	0	15.2853	11.3956	7.49538	11.7581	0	1.08297	0	5.87717	1.74038	-0.800174	-1.39261	0.380875	0.42361	0.999616
23347	ppc-miR-8355-5p	miR-8355-5p	1.05254	6.68731	6.51179	4.99692	6.271	1.74503	19.4934	11.5598	7.28973	1.26725	0.800005	1.01381	2.01923	0.423708	0.999616
31261	piR-hsa-2154	piR-hsa-2154	0	7.64264	0	5.82974	0.783876	2.90839	1.08297	0	2.28095	1.82445	-0.798662	-1.45712	0.36422	0.424486	0.999616
12832	bdi-MIR7749-5p	MIR7749-5p	0	0.95533	1.62795	1.66564	2.35163	0	6.49781	2.56885	1.9584	1.77244	0.797827	1.4141	2.66493	0.424971	0.999616
35851	piR-hsa-26815	piR-hsa-26815	7.36778	4.77665	8.13973	0	2.35163	1.74503	4.33187	0	3.58909	1.55368	-0.797798	-1.23952	0.423513	0.424988	0.999616
29012	gga-mir-138-2	mir-138-2	1.05254	6.68731	1.62795	1.66564	0	1.74503	0	2.56885	1.91841	1.74585	-0.796371	-1.39034	0.381474	0.425816	0.999616
24160	ptc-MIR474b-5p	MIR474b-5p	3.15762	0	0	0	0.783876	6.98013	2.16594	0	1.63594	2.09483	0.796204	1.66791	3.17754	0.425914	0.999616
21965	nta-MIR6159-3p	MIR6159-3p	1.05254	7.64264	9.76768	0.83282	5.48713	8.14348	12.9956	11.5598	7.18521	1.27039	0.796108	1.01137	2.01583	0.425969	0.999616
7695	pma-miR-4555-5p	miR-4555-5p	0	1.91066	0	0.83282	0	1.74503	3.2489	3.85327	1.44884	1.95865	0.796026	1.55914	2.94678	0.426017	0.999616
33244	piR-hsa-15320	piR-hsa-15320	1.05254	0.95533	1.62795	0	2.35163	2.90839	2.16594	1.28442	1.54327	1.71385	0.794875	1.3623	2.57094	0.426686	0.999616
30140	rno-miR-6319-2-5p	miR-6319-2-5p	1.05254	1.91066	4.88384	2.49846	0.783876	1.16335	1.08297	1.28442	1.83251	1.5559	-0.794855	-1.23671	0.424338	0.426698	0.999616
773	cgr-mir-632	mir-632	3.15762	0.95533	3.25589	0.83282	0.783876	0	2.16594	0	1.39393	1.87943	-0.794446	-1.4931	0.355248	0.426936	0.999616
31035	piR-hsa-31237	piR-hsa-31237	72.6252	0	92.7929	0	86.2263	120.989	85.5545	98.9005	69.636	1.57025	0.794423	1.24744	2.3742	0.426949	0.999616
2878	nlo-mir-282	mir-282	2.10508	1.91066	0	0.83282	0	3.49006	5.41484	3.85327	2.20084	1.68156	0.794254	1.33559	2.52378	0.427047	0.999616
21330	mmu-mir-363	mir-363	1.05254	3.82132	9.76768	0	12.542	5.81677	2.16594	10.2754	5.6802	1.42454	0.79354	1.13043	2.18924	0.427463	0.999616
16422	ebv-mir-BART15	mir-BART15	0	0.95533	1.62795	0.83282	0	1.16335	4.33187	3.85327	1.59557	1.84884	0.79327	1.46663	2.76376	0.42762	0.999616
24856	sbi-MIR821e	MIR821e	0	2.86599	1.62795	0	2.35163	1.74503	1.08297	6.42211	2.01196	1.73492	0.792865	1.37555	2.59468	0.427856	0.999616
13429	bmo-mir-2768	mir-2768	0	0.95533	1.62795	1.66564	0	2.90839	4.33187	3.85327	1.91781	1.74357	0.792438	1.38167	2.6057	0.428105	0.999616
10160	hsa-miR-3169-3p	miR-3169-3p	0	1.91066	8.13973	1.66564	1.56775	0.581677	2.16594	0	2.00392	1.74376	-0.792108	-1.38124	0.383888	0.428298	0.999616
37913	piR-hsa-6905	piR-hsa-6905	2.10508	2.86599	3.25589	0.83282	0	0	3.2489	0	1.53859	1.9477	-0.791391	-1.54139	0.343554	0.428716	0.999616
32620	piR-hsa-13012	piR-hsa-13012	1.05254	0.95533	0	0.83282	1.56775	2.90839	0	3.85327	1.39626	1.85442	0.791255	1.46732	2.76507	0.428795	0.999616
16534	eca-miR-8964-5p	miR-8964-5p	4.21016	4.77665	3.25589	1.66564	1.56775	2.32671	1.08297	1.28442	2.52127	1.41186	-0.791075	-1.11689	0.461088	0.4289	0.999616
1297	mmu-miR-1934-5p	miR-1934-5p	5.2627	6.68731	1.62795	9.16102	2.35163	2.32671	5.41484	1.28442	4.26457	1.29769	-0.789409	-1.02441	0.491612	0.429873	0.999616
17946	gma-MIR1520f	MIR1520f	2.10508	3.82132	8.13973	0	7.05488	8.14348	5.41484	7.70654	5.29823	1.35009	0.789392	1.06575	2.09326	0.429883	0.999616
10927	ppe-MIR169g	MIR169g	1.05254	0	0	2.49846	0	0	5.41484	6.42211	1.92349	2.0672	0.789046	1.63112	3.09753	0.430085	0.999616
18779	hhi-mir-21	mir-21	0	7.64264	11.3956	0.83282	0	2.32671	4.33187	1.28442	3.47676	1.65715	-0.788861	-1.30726	0.404087	0.430194	0.999616
28659	ptr-miR-92-2-3p	miR-92-2-3p	43.1541	16.2406	50.4663	26.6503	17.2453	18.032	28.1572	14.1286	26.7593	1.02952	-0.788669	-0.811949	0.569612	0.430305	0.999616
20551	mdo-miR-7290-3p	miR-7290-3p	10.5254	3.82132	1.62795	4.1641	0	5.2351	1.08297	2.56885	3.62821	1.47661	-0.788134	-1.16377	0.446346	0.430618	0.999616
24897	sja-miR-3483-3p	miR-3483-3p	1.05254	0	0	5.82974	4.70325	4.07174	1.08297	7.70654	3.05585	1.6186	0.787983	1.27543	2.42071	0.430707	0.999616
25417	ssc-miR-664-5p	miR-664-5p	1.05254	8.59797	1.62795	3.33128	0.783876	0.581677	0	5.13769	2.63912	1.60628	-0.787664	-1.26521	0.41604	0.430893	0.999616
17699	gga-mir-6609	mir-6609	3.15762	4.77665	6.51179	7.49538	3.1355	2.90839	1.08297	3.85327	4.11519	1.2665	-0.787445	-0.9973	0.500937	0.431022	0.999616
28513	tae-MIR5175-3p	MIR5175-3p	1.05254	30.5705	4.88384	0.83282	11.7581	8.14348	31.4061	26.9729	14.4525	1.34193	0.787197	1.05636	2.07968	0.431167	0.999616
32084	piR-hsa-11130	piR-hsa-11130	2.10508	2.86599	1.62795	1.66564	0.783876	1.16335	0	1.28442	1.43704	1.70777	-0.786644	-1.3434	0.39409	0.431491	0.999616
22859	osa-MIR5823	MIR5823	7.36778	9.5533	6.51179	0	2.35163	1.16335	6.49781	0	4.18071	1.56017	-0.786479	-1.22704	0.427193	0.431587	0.999616
3268	ath-MIR5639-5p	MIR5639-5p	10.5254	14.3299	26.0471	9.16102	4.70325	8.14348	8.66375	11.5598	11.6417	1.09165	-0.786076	-0.85812	0.551671	0.431823	0.999616
20555	mdo-miR-7305-3p	miR-7305-3p	3.15762	3.82132	0	1.66564	0	1.74503	0	1.28442	1.45925	1.91859	-0.785949	-1.50791	0.35162	0.431897	0.999616
27484	gsa-mir-2b	mir-2b	5.2627	13.3746	1.62795	5.82974	7.83876	8.14348	3.2489	33.395	9.84014	1.25081	0.785893	0.983003	1.97658	0.43193	0.999616
18676	hco-miR-5967-5p	miR-5967-5p	0	4.77665	3.25589	0	0	1.16335	0	1.28442	1.31004	2.17369	-0.785529	-1.7075	0.30619	0.432144	0.999616
11419	aae-miR-11-5p	miR-11-5p	3.15762	0	0	0	1.56775	1.74503	3.2489	2.56885	1.53602	1.90977	0.784941	1.49906	2.82658	0.432488	0.999616
291	bta-miR-1249-3p	miR-1249-3p	52.627	35.3472	47.2104	40.8082	26.6518	27.9205	0	34.6794	33.1556	1.24953	-0.782962	-0.978335	0.507565	0.43365	0.999616
28693	efu-miR-9198b-4-5p	miR-9198b-4-5p	2.10508	3.82132	4.88384	0.83282	0.783876	1.74503	2.16594	0	2.04224	1.58983	-0.782872	-1.24463	0.422015	0.433702	0.999616
1017	ggo-mir-139	mir-139	8.42032	11.464	0	0	6.271	0	0	0	3.26941	2.10141	-0.78255	-1.64446	0.319866	0.433892	0.999616
5546	ggo-mir-346	mir-346	0	0	0	16.6564	25.8679	0	27.0742	0	8.69981	2.104	0.782383	1.64614	3.12994	0.433989	0.999616
20196	isc-mir-5312	mir-5312	2.10508	0	0	4.1641	0	4.07174	11.9127	1.28442	2.94225	1.79417	0.781871	1.40281	2.64417	0.43429	0.999616
13194	bmo-miR-2789-5p	miR-2789-5p	2.10508	0.95533	9.76768	6.66256	0	0	0	7.70654	3.39965	1.80442	-0.781651	-1.41043	0.3762	0.43442	0.999616
35053	piR-hsa-2321	piR-hsa-2321	4.21016	3.82132	0	2.49846	2.35163	0.581677	0	1.28442	1.84346	1.71635	-0.780333	-1.33932	0.395206	0.435195	0.999616
26149	tur-miR-745-3p	miR-745-3p	0	4.77665	1.62795	2.49846	0.783876	0	0	2.56885	1.53197	1.96119	-0.780256	-1.53023	0.346222	0.43524	0.999616
17909	ghr-MIR7499	MIR7499	0	0.95533	0	1.66564	1.56775	1.74503	3.2489	1.28442	1.30839	1.85229	0.778877	1.44271	2.7183	0.436052	0.999616
32129	piR-hsa-11284	piR-hsa-11284	4.21016	3.82132	1.62795	4.1641	5.48713	5.2351	8.66375	7.70654	5.1145	1.20689	0.778442	0.939491	1.91785	0.436308	0.999616
21665	mtr-MIR2630x	MIR2630x	0	2.86599	1.62795	0	1.56775	2.90839	5.41484	1.28442	1.95867	1.73045	0.777658	1.3457	2.54154	0.436771	0.999616
26816	cbn-mir-1824b	mir-1824b	7.36778	13.3746	3.25589	0.83282	7.83876	9.30684	10.8297	20.5508	9.16964	1.22414	0.777657	0.951958	1.9345	0.436771	0.999616
17860	ggo-mir-548d	mir-548d	3.15762	0.95533	6.51179	0	0	0.581677	2.16594	1.28442	1.8321	1.81142	-0.777227	-1.40788	0.376864	0.437025	0.999616
799	cin-miR-126-3p	miR-126-3p	1.05254	0.95533	0	1.66564	2.35163	4.65342	1.08297	1.28442	1.63074	1.68356	0.77662	1.30749	2.4751	0.437383	0.999616
2502	pmi-miR-92d-3p	miR-92d-3p	12.6305	13.3746	21.1633	7.49538	7.05488	5.81677	14.0786	2.56885	10.5229	1.13374	-0.776023	-0.879812	0.543438	0.437735	0.999616
26958	cin-let-7d-3p	let-7d-3p	1.05254	7.64264	0	0.83282	5.48713	0.581677	14.0786	2.56885	4.03053	1.55583	0.775866	1.20711	2.30875	0.437828	0.999616
16716	eca-mir-711	mir-711	2.10508	0.95533	0	0	3.91938	2.32671	0	2.56885	1.48442	1.93414	0.775705	1.50032	2.82905	0.437923	0.999616
9794	efu-mir-320	mir-320	5.2627	6.68731	4.88384	0.83282	3.1355	0.581677	2.16594	2.56885	3.26483	1.39308	-0.774738	-1.07928	0.473267	0.438495	0.999616
17651	gga-mir-20b	mir-20b	2.10508	0.95533	0	0	0	1.16335	0	8.99096	1.65184	2.13564	0.774665	1.65441	3.14794	0.438538	0.999616
1598	mmu-miR-471-3p	miR-471-3p	1.05254	0.95533	0	3.33128	3.1355	8.14348	2.16594	0	2.34801	1.67831	0.774008	1.29903	2.46063	0.438926	0.999616
19665	hsa-mir-2277	mir-2277	1.05254	1.91066	3.25589	2.49846	0	1.16335	1.08297	1.28442	1.53104	1.69975	-0.773829	-1.31532	0.401838	0.439032	0.999616
26543	api-miR-971-3p	miR-971-3p	1.05254	3.82132	3.25589	0.83282	0	1.16335	2.16594	0	1.53648	1.81105	-0.772963	-1.39987	0.378962	0.439545	0.999616
6228	hsa-mir-210	mir-210	3.15762	0.95533	0	0	0	0	14.0786	0	2.27394	2.25687	0.771991	1.74228	3.34564	0.44012	0.999616
31340	piR-hsa-27905	piR-hsa-27905	3.15762	0.95533	0	0	2.35163	0	5.41484	3.85327	1.96659	1.87515	0.771795	1.44723	2.72683	0.440236	0.999616
21800	mtr-MIR5271a-3p	MIR5271a-3p	5.2627	0	0	7.49538	3.91938	5.81677	7.58078	11.5598	5.20435	1.46716	0.771485	1.13189	2.19146	0.44042	0.999616
9786	efu-mir-128a	mir-128a	3.15762	0.95533	8.13973	1.66564	1.56775	2.90839	1.08297	0	2.43468	1.55874	-0.771341	-1.20232	0.434575	0.440505	0.999616
31860	piR-hsa-1036	piR-hsa-1036	1.05254	0	0	2.49846	3.1355	4.07174	1.08297	1.28442	1.6407	1.77799	0.770897	1.37065	2.58586	0.440768	0.999616
664	cgr-miR-1949-3p	miR-1949-3p	0	0	27.6751	9.16102	0	0	11.9127	0	6.0936	2.11994	-0.770833	-1.63412	0.322167	0.440806	0.999616
2535	rno-miR-1193-3p	miR-1193-3p	0	228.324	0	0	268.085	0	271.825	174.681	117.864	2.13503	0.770462	1.64496	3.12738	0.441026	0.999616
14387	ccr-mir-128	mir-128	1.05254	2.86599	4.88384	0	0	1.74503	1.08297	0	1.4538	1.97244	-0.770175	-1.51912	0.348898	0.441196	0.999616
22549	osa-MIR159b	MIR159b	2.10508	1.91066	0	0	2.35163	2.32671	4.33187	1.28442	1.7888	1.71929	0.768382	1.32107	2.49851	0.44226	0.999616
3639	bmo-mir-3315	mir-3315	2.10508	0	0	0.83282	3.1355	4.07174	0	1.28442	1.4287	1.96265	0.768206	1.50772	2.8436	0.442365	0.999616
21926	nta-MIR397	MIR397	11.5779	0.95533	11.3956	8.3282	10.1904	12.7969	17.3275	19.2663	11.4798	1.16153	0.767399	0.891354	1.85492	0.442844	0.999616
29321	ssa-mir-181a-5	mir-181a-5	19.9983	14.3299	9.76768	6.66256	18.0291	13.3786	32.489	25.6885	17.543	1.06127	0.767283	0.814295	1.75844	0.442913	0.999616
22206	oan-mir-1325	mir-1325	1.05254	9.5533	3.25589	0	3.1355	0	1.08297	1.28442	2.42058	1.75314	-0.766197	-1.34325	0.394131	0.443559	0.999616
893	eca-mir-31	mir-31	1.05254	2.86599	24.4192	3.33128	10.9743	0.581677	1.08297	1.28442	5.69904	1.48714	-0.765938	-1.13905	0.454057	0.443713	0.999616
9976	ghr-MIR7487-5p	MIR7487-5p	12.6305	15.2853	1.62795	8.3282	14.8936	12.7969	22.7423	19.2663	13.4464	1.12587	0.765409	0.861752	1.81724	0.444028	0.999616
20400	lva-mir-2013	mir-2013	1.05254	1.91066	0	0.83282	0.783876	1.16335	5.41484	2.56885	1.71587	1.68738	0.765326	1.29139	2.44764	0.444078	0.999616
5163	far-MIR169	MIR169	4.21016	1.91066	4.88384	3.33128	3.1355	1.16335	1.08297	1.28442	2.62527	1.40515	-0.765055	-1.07502	0.474665	0.444239	0.999616
1500	mmu-miR-3471-1-5p	miR-3471-1-5p	3.15762	5.73198	8.13973	0	8.62263	10.4702	6.49781	7.70654	6.29081	1.31561	0.764938	1.00636	2.00883	0.444309	0.999616
1461	mmu-miR-3103-3p	miR-3103-3p	9.47286	6.68731	17.9074	9.16102	9.40651	6.39845	2.16594	5.13769	8.29215	1.15028	-0.764305	-0.879163	0.543683	0.444686	0.999616
31012	piR-hsa-28322	piR-hsa-28322	5.2627	121.327	110.7	9.99384	90.9296	7.5618	5.41484	16.6975	45.9859	1.35116	-0.763739	-1.03193	0.489055	0.445023	0.999616
20612	mdo-miR-7391-5p	miR-7391-5p	6.31524	2.86599	3.25589	0	0	9.88851	2.16594	16.6975	5.14863	1.59074	0.762611	1.21311	2.31837	0.445695	0.999616
14088	bta-mir-6536-1	mir-6536-1	0	0	3.25589	0	0	1.74503	1.08297	5.13769	1.4027	2.18129	0.761498	1.66105	3.16247	0.44636	0.999616
2310	mmu-mir-669g	mir-669g	3.15762	3.82132	8.13973	0	2.35163	1.74503	1.08297	1.28442	2.69784	1.5335	-0.760616	-1.1664	0.44553	0.446886	0.999616
2272	mmu-mir-467a-1	mir-467a-1	32.6287	38.2132	32.5589	40.8082	28.2195	0	25.9912	19.2663	27.2108	1.28595	-0.760314	-0.977728	0.507779	0.447067	0.999616
14640	cfa-miR-589-5p	miR-589-5p	1.05254	0.95533	9.76768	2.49846	1.56775	2.90839	0	1.28442	2.50432	1.58844	-0.75847	-1.20478	0.433835	0.44817	0.999616
2918	sma-mir-8447	mir-8447	2.10508	3.82132	1.62795	0.83282	0	0	2.16594	1.28442	1.47969	1.85467	-0.75707	-1.40411	0.377851	0.449008	0.999616
29797	efu-miR-9215a-4-3p	miR-9215a-4-3p	1.05254	1.91066	3.25589	1.66564	1.56775	1.16335	0	0	1.32698	1.83045	-0.755773	-1.3834	0.383314	0.449785	0.999616
25688	tae-MIR1122b	MIR1122b	2.10508	6.68731	1.62795	4.99692	7.05488	6.98013	4.33187	11.5598	5.66799	1.22337	0.755528	0.924292	1.89775	0.449932	0.999616
7780	ppc-mir-83	mir-83	5.2627	1.91066	6.51179	3.33128	1.56775	1.16335	4.33187	1.28442	3.17048	1.3638	-0.755263	-1.03003	0.489702	0.450091	0.999616
26070	tgu-mir-1669	mir-1669	10.5254	6.68731	9.76768	4.99692	4.70325	6.39845	4.33187	1.28442	6.08691	1.19452	-0.75494	-0.901789	0.535223	0.450285	0.999616
13565	bna-MIR169a-3p	MIR169a-3p	37.8914	19.1066	0	18.322	18.0291	0	1.08297	14.1286	13.5701	1.57697	-0.754579	-1.18994	0.43832	0.450502	0.999616
29618	cfa-mir-8794-2	mir-8794-2	0	3.82132	3.25589	2.49846	0.783876	0.581677	0	2.56885	1.68876	1.77932	-0.75432	-1.34217	0.394426	0.450657	0.999616
18108	gma-MIR4364a	MIR4364a	2.10508	0.95533	8.13973	0	0.783876	0	3.2489	0	1.90412	1.9358	-0.753854	-1.45931	0.363667	0.450937	0.999616
38304	piR-hsa-8797	piR-hsa-8797	5.2627	4.77665	11.3956	5.82974	13.3259	5.81677	15.1616	14.1286	9.4622	1.11534	0.753755	0.840692	1.79091	0.450996	0.999616
34672	piR-hsa-2155	piR-hsa-2155	7.36778	0	0	0	0	6.98013	0	15.4131	3.72012	2.10607	0.753078	1.58603	3.00222	0.451403	0.999616
2653	ssa-miR-21a-1-5p	miR-21a-1-5p	10.5254	5.73198	4.88384	12.4923	18.813	11.0519	11.9127	17.9819	11.6741	1.08487	0.752106	0.815936	1.76044	0.451988	0.999616
34321	piR-hsa-19948	piR-hsa-19948	5.2627	3.82132	4.88384	1.66564	0.783876	4.65342	0	1.28442	2.7944	1.50979	-0.752051	-1.13544	0.455197	0.452021	0.999616
25334	ssa-miR-301b-3p	miR-301b-3p	1.05254	0.95533	1.62795	1.66564	3.91938	2.90839	3.2489	1.28442	2.08282	1.49601	0.751132	1.1237	2.17905	0.452574	0.999616
34973	piR-hsa-22971	piR-hsa-22971	2.10508	3.82132	0	1.66564	3.1355	2.32671	0	12.8442	3.23731	1.60365	0.750876	1.20414	2.304	0.452728	0.999616
31332	piR-hsa-27283	piR-hsa-27283	5.2627	2.86599	1.62795	4.99692	3.91938	7.5618	5.41484	11.5598	5.40117	1.22197	0.750277	0.916819	1.88795	0.453088	0.999616
11861	ame-miR-11-5p	miR-11-5p	2.10508	1.91066	0	0.83282	3.1355	2.32671	3.2489	2.56885	2.01606	1.55156	0.749486	1.16288	2.23903	0.453564	0.999616
35719	piR-hsa-26281	piR-hsa-26281	0	1.91066	0	1.66564	3.1355	2.90839	0	3.85327	1.68418	1.85314	0.749409	1.38876	2.61854	0.453611	0.999616
26136	tur-miR-2-1-5p	miR-2-1-5p	2.10508	0.95533	0	0	0	0	2.16594	7.70654	1.61661	2.14495	0.749141	1.60687	3.04591	0.453772	0.999616
241	ame-miR-92c-3p	miR-92c-3p	7.36778	11.464	9.76768	5.82974	1.56775	6.39845	4.33187	6.42211	6.64367	1.17436	-0.749112	-0.879726	0.543471	0.453789	0.999616
9262	bta-miR-2401-5p	miR-2401-5p	10.5254	31.5259	9.76768	18.322	21.9485	14.5419	9.74671	82.203	24.8227	1.15114	0.748197	0.861283	1.81665	0.454341	0.999616
20939	mml-miR-7170-5p	miR-7170-5p	1.05254	4.77665	0	2.49846	2.35163	0.581677	0	0	1.40762	1.95281	-0.747902	-1.46051	0.363366	0.454519	0.999616
14668	cfa-miR-8828-5p	miR-8828-5p	3.15762	4.77665	3.25589	0	1.56775	1.74503	1.08297	0	1.94824	1.7018	-0.747808	-1.27262	0.413907	0.454576	0.999616
754	cgr-mir-183	mir-183	10.5254	1.91066	0	0	14.1098	0	7.58078	8.99096	5.38969	1.72201	0.747342	1.28693	2.44009	0.454857	0.999616
402	bta-miR-340-3p	miR-340-3p	0	68.7837	30.931	55.799	82.3069	91.905	73.6418	55.2302	57.3247	1.28668	0.747331	0.961573	1.94743	0.454864	0.999616
6779	mmu-miR-154-5p	miR-154-5p	0	0	32.5589	0	53.3035	44.7892	0	0	16.3315	2.16043	0.747299	1.61449	3.06203	0.454883	0.999616
30952	piR-hsa-22381	piR-hsa-22381	10.5254	16.2406	17.9074	24.9846	12.542	0	11.9127	11.5598	13.2091	1.28988	-0.747234	-0.963842	0.51269	0.454922	0.999616
1650	mmu-miR-5134-3p	miR-5134-3p	0	3.82132	6.51179	0	0	2.90839	0	0	1.65519	2.23993	-0.7471	-1.67345	0.313503	0.455003	0.999616
11673	aga-mir-286	mir-286	7.36778	0	3.25589	0	3.91938	4.65342	10.8297	3.85327	4.23493	1.54275	0.747079	1.15255	2.22307	0.455016	0.999616
2352	mmu-mir-713	mir-713	3.15762	1.91066	1.62795	2.49846	1.56775	1.16335	1.08297	0	1.62609	1.63427	-0.746174	-1.21945	0.429446	0.455562	0.999616
21276	mmu-mir-1251	mir-1251	1.05254	6.68731	0	2.49846	0.783876	0	1.08297	2.56885	1.83425	1.78653	-0.745403	-1.33168	0.397305	0.456028	0.999616
12358	ath-MIR2936-3p	MIR2936-3p	63.1524	64.9624	30.931	18.322	47.8164	34.319	144.035	80.9186	60.5571	1.06122	0.743953	0.7895	1.72848	0.456905	0.999616
18823	hme-miR-308-3p	miR-308-3p	0	15.2853	0	6.66256	7.05488	8.72516	4.33187	28.2573	8.78963	1.4925	0.743466	1.10962	2.15789	0.4572	0.999616
28628	mmu-mir-24-2	mir-24-2	7.36778	5.73198	6.51179	3.33128	1.56775	2.32671	3.2489	5.13769	4.40298	1.24498	-0.742968	-0.924982	0.526687	0.457501	0.999616
22226	oan-mir-1420d	mir-1420d	3.15762	12.4193	6.51179	8.3282	10.9743	8.72516	11.9127	23.1196	10.6436	1.12094	0.742886	0.83273	1.78105	0.457551	0.999616
20845	mml-miR-1234-5p	miR-1234-5p	0	0	1.62795	2.49846	3.1355	2.32671	3.2489	1.28442	1.76524	1.73534	0.742874	1.28914	2.44383	0.457558	0.999616
2436	ola-miR-192-5p	miR-192-5p	0	0.95533	0	6.66256	0	0.581677	9.74671	10.2754	3.52771	1.82707	0.742734	1.35703	2.56157	0.457643	0.999616
5717	gma-MIR9729	MIR9729	2.10508	22.9279	19.5354	3.33128	3.1355	2.32671	11.9127	7.70654	9.12263	1.27138	-0.742501	-0.944004	0.519788	0.457784	0.999616
19825	hsa-mir-4784	mir-4784	0	0	3.25589	1.66564	1.56775	2.90839	5.41484	1.28442	2.01212	1.71123	0.742368	1.27036	2.41222	0.457864	0.999616
13310	bmo-miR-3288-3p	miR-3288-3p	0	2.86599	0	0.83282	0	3.49006	0	7.70654	1.86193	2.05068	0.74179	1.52117	2.87025	0.458214	0.999616
22072	nvi-mir-2a	mir-2a	3.15762	0.95533	0	0	1.56775	0.581677	1.08297	7.70654	1.88149	1.81041	0.74163	1.34265	2.53618	0.458312	0.999616
30900	piR-hsa-1043	piR-hsa-1043	4.21016	3.82132	1.62795	4.1641	5.48713	6.39845	2.16594	12.8442	5.08991	1.2533	0.74119	0.928931	1.90386	0.458578	0.999616
785	chi-miR-424-5p	miR-424-5p	1.05254	1.91066	0	0	1.56775	0.581677	1.08297	5.13769	1.41666	1.88337	0.741177	1.39591	2.63154	0.458586	0.999616
21339	mmu-mir-466i	mir-466i	3.15762	1.91066	4.88384	0	0	0.581677	2.16594	1.28442	1.74802	1.79143	-0.741039	-1.32752	0.398452	0.45867	0.999616
20355	lus-MIR393b	MIR393b	8.42032	7.64264	6.51179	6.66256	3.91938	4.07174	4.33187	3.85327	5.6767	1.15454	-0.740967	-0.855474	0.552684	0.458713	0.999616
33525	piR-hsa-16395	piR-hsa-16395	6.31524	5.73198	9.76768	1.66564	0.783876	2.90839	3.2489	5.13769	4.44492	1.3017	-0.74096	-0.964505	0.512454	0.458718	0.999616
5666	gma-MIR4349-5p	MIR4349-5p	0	0.95533	3.25589	0.83282	3.1355	1.16335	5.41484	1.28442	2.00527	1.63987	0.740789	1.2148	2.32108	0.458821	0.999616
15272	cpa-MIR8153	MIR8153	1.05254	2.86599	0	1.66564	2.35163	0.581677	6.49781	3.85327	2.35857	1.56879	0.739424	1.16	2.23457	0.45965	0.999616
931	efu-mir-30c	mir-30c	3.15762	0	0	0	1.56775	0	5.41484	2.56885	1.58863	2.09859	0.739233	1.55135	2.93091	0.459765	0.999616
19700	hsa-mir-3622a	mir-3622a	3.15762	3.82132	0	0.83282	0.783876	0	2.16594	0	1.3452	1.99307	-0.739186	-1.47325	0.36017	0.459794	0.999616
23348	ppc-miR-8356a-5p	miR-8356a-5p	1.05254	2.86599	1.62795	1.66564	5.48713	1.16335	2.16594	6.42211	2.80633	1.423	0.738774	1.05128	2.07236	0.460044	0.999616
14035	bta-mir-2461	mir-2461	3.15762	0	0	0	0	6.98013	1.08297	1.28442	1.56314	2.1372	0.738	1.57725	2.98401	0.460514	0.999616
17308	gga-miR-1690-5p	miR-1690-5p	5.2627	2.86599	0	0.83282	0	0	1.08297	2.56885	1.57667	1.95677	-0.737959	-1.44402	0.367542	0.460539	0.999616
1189	mdo-miR-15a-5p	miR-15a-5p	6.31524	1.91066	0	3.33128	4.70325	6.98013	1.08297	11.5598	4.48542	1.40678	0.736523	1.03613	2.05072	0.461413	0.999616
2143	mmu-miR-878-3p	miR-878-3p	0	0	0	2.49846	3.91938	4.65342	0	0	1.38391	2.27856	0.736145	1.67735	3.1984	0.461643	0.999616
28750	aca-mir-124a-3	mir-124a-3	1.05254	3.82132	0	0.83282	0	2.32671	5.41484	6.42211	2.48379	1.68035	0.736023	1.23678	2.35671	0.461717	0.999616
23739	ppt-MIR902l	MIR902l	3.15762	3.82132	0	2.49846	4.70325	4.07174	3.2489	7.70654	3.65098	1.36373	0.735689	1.00328	2.00455	0.46192	0.999616
10	aae-miR-133-3p	miR-133-3p	0	32.4812	0	0	81.5231	0	0	17.9819	16.4983	2.18869	0.735526	1.60984	3.05217	0.462019	0.999616
7374	oha-mir-1397	mir-1397	0	0.95533	0	1.66564	2.35163	1.16335	4.33187	0	1.30848	1.98042	0.735414	1.45643	2.74428	0.462087	0.999616
20450	mdm-MIR167j	MIR167j	0	7.64264	1.62795	0.83282	0	0.581677	3.2489	0	1.74175	1.96022	-0.735358	-1.44146	0.368195	0.462122	0.999616
1352	mmu-miR-219a-1-3p	miR-219a-1-3p	43.1541	49.6771	60.234	47.4708	33.7066	27.3388	28.1572	33.395	40.3917	0.965422	-0.734863	-0.709453	0.611552	0.462423	0.999616
20203	isc-mir-iab-4	mir-iab-4	1.05254	2.86599	0	2.49846	0.783876	4.07174	8.66375	1.28442	2.6526	1.55468	0.734759	1.14232	2.20735	0.462486	0.999616
841	dre-miR-223-3p	miR-223-3p	690.466	742.291	475.36	0	645.13	0.581677	0	0	319.229	2.12762	-0.734537	-1.56282	0.33849	0.462622	0.999616
2109	mmu-miR-7687-5p	miR-7687-5p	4.21016	0	8.13973	4.99692	1.56775	0.581677	5.41484	0	3.11389	1.62717	-0.734407	-1.195	0.436786	0.462701	0.999616
1442	mmu-miR-3091-5p	miR-3091-5p	2.10508	1.91066	1.62795	3.33128	1.56775	3.49006	4.33187	8.99096	3.41945	1.34655	0.734379	0.988879	1.98464	0.462718	0.999616
23196	pmi-mir-184	mir-184	1.05254	0	6.51179	0.83282	0.783876	0	1.08297	1.28442	1.44355	1.93	-0.734213	-1.41703	0.374482	0.462819	0.999616
19941	hsa-mir-6772	mir-6772	0	1.91066	1.62795	0.83282	2.35163	2.90839	3.2489	1.28442	1.7706	1.63622	0.734076	1.20111	2.29916	0.462902	0.999616
38361	piR-hsa-9025	piR-hsa-9025	3.15762	0	3.25589	1.66564	1.56775	1.16335	0	0	1.35128	1.94985	-0.733105	-1.42944	0.371274	0.463494	0.999616
2567	rno-miR-3590-3p	miR-3590-3p	4.21016	0.95533	1.62795	2.49846	0	0.581677	1.08297	2.56885	1.69067	1.69246	-0.73243	-1.23961	0.423488	0.463906	0.999616
10787	osa-MIR1861c-3p	MIR1861c-3p	8.42032	9.5533	11.3956	4.99692	7.05488	4.07174	1.08297	6.42211	6.62473	1.19501	-0.731274	-0.873881	0.545677	0.464612	0.999616
20349	lus-MIR172d	MIR172d	7.36778	6.68731	17.9074	0.83282	3.1355	3.49006	8.66375	1.28442	6.17113	1.31494	-0.731089	-0.961338	0.51358	0.464725	0.999616
31319	piR-hsa-2633	piR-hsa-2633	1.05254	7.64264	0	0.83282	5.48713	0.581677	12.9956	2.56885	3.89516	1.55504	0.73079	1.13641	2.19833	0.464908	0.999616
24722	rno-mir-486	mir-486	1.05254	0	0	9.99384	0	0	0	3.85327	1.86246	2.26703	-0.730745	-1.65662	0.317181	0.464935	0.999616
10663	nta-MIR169q	MIR169q	11.5779	5.73198	9.76768	1.66564	7.83876	2.32671	3.2489	1.28442	5.43025	1.28501	-0.730491	-0.93869	0.521706	0.46509	0.999616
20018	hsv1-miR-H16-5p	-miR-H16-5p	1.05254	0	0	1.66564	1.56775	0	5.41484	1.28442	1.37315	2.0205	0.730426	1.47583	2.78143	0.46513	0.999616
30947	piR-hsa-2107	piR-hsa-2107	51.5744	169.093	76.5135	94.1087	55.6552	53.5143	301.065	271.013	134.067	1.0936	0.729804	0.798116	1.73883	0.46551	0.999616
8109	pti-MIR5476	MIR5476	0	2.86599	0	3.33128	2.35163	2.90839	5.41484	3.85327	2.59067	1.57135	0.729206	1.14584	2.21275	0.465876	0.999616
27483	gsa-mir-2a	mir-2a	7.36778	1.91066	1.62795	1.66564	0.783876	0.581677	4.33187	0	2.28368	1.61089	-0.728739	-1.17391	0.443217	0.466162	0.999616
35178	piR-hsa-2382	piR-hsa-2382	1.05254	0	1.62795	1.66564	0.783876	2.32671	0	7.70654	1.89541	1.79335	0.728529	1.30651	2.47342	0.46629	0.999616
34542	piR-hsa-20950	piR-hsa-20950	7.36778	6.68731	4.88384	5.82974	3.91938	4.65342	2.16594	2.56885	4.75953	1.20852	-0.727253	-0.878897	0.543783	0.467071	0.999616
37675	piR-hsa-5811	piR-hsa-5811	2.10508	1.91066	0	2.49846	1.56775	3.49006	5.41484	3.85327	2.60502	1.4657	0.727245	1.06592	2.09351	0.467076	0.999616
1075	hsa-miR-1247-3p	miR-1247-3p	168.406	2.86599	0	0	148.936	194.862	1.08297	82.203	74.7946	1.81391	0.726693	1.31816	2.49347	0.467414	0.999616
21903	nta-MIR167b	MIR167b	11.5779	4.77665	4.88384	0	7.05488	16.287	9.74671	7.70654	7.75419	1.31542	0.726082	0.955101	1.93871	0.467789	0.999616
31037	piR-hsa-325	piR-hsa-325	24.2084	33.4365	11.3956	16.6564	27.4356	9.30684	58.4803	53.9457	29.3582	1.08943	0.726068	0.791	1.73027	0.467797	0.999616
17752	ggo-miR-3138-5p	miR-3138-5p	7.36778	6.68731	8.13973	5.82974	0	2.90839	1.08297	10.2754	5.28641	1.39328	-0.725757	-1.01118	0.49614	0.467988	0.999616
17989	gma-MIR160c	MIR160c	0	2.86599	4.88384	0.83282	0	1.74503	0	1.28442	1.45151	1.97048	-0.725601	-1.42978	0.371186	0.468083	0.999616
24128	ptc-MIR3627b-5p	MIR3627b-5p	4.21016	8.59797	3.25589	6.66256	7.05488	7.5618	9.74671	16.6975	7.97343	1.14086	0.725421	0.8276	1.77473	0.468194	0.999616
1897	mmu-miR-6992-5p	miR-6992-5p	5.2627	1.91066	8.13973	0.83282	0.783876	2.32671	3.2489	1.28442	2.97373	1.43457	-0.725068	-1.04016	0.486274	0.46841	0.999616
8808	xtr-mir-135-1	mir-135-1	5.2627	0	3.25589	1.66564	3.1355	0.581677	0	0	1.73768	1.89316	-0.724955	-1.37245	0.386234	0.46848	0.999616
32880	piR-hsa-13895	piR-hsa-13895	0	1.91066	6.51179	1.66564	3.91938	5.2351	6.49781	3.85327	3.6992	1.41049	0.724741	1.02224	2.03107	0.468611	0.999616
1518	mmu-miR-3544-3p	miR-3544-3p	0	77.3817	0	69.9569	0	0	0	48.8081	24.5183	2.21451	-0.724575	-1.60458	0.328831	0.468713	0.999616
17365	gga-miR-1783-5p	miR-1783-5p	4.21016	0	4.88384	0.83282	2.35163	1.16335	0	0	1.68022	1.89996	-0.724493	-1.37651	0.38515	0.468763	0.999616
9234	bta-miR-1271-3p	miR-1271-3p	0	0	6.51179	0	0	2.90839	5.41484	7.70654	2.81769	1.94519	0.723887	1.4081	2.65387	0.469135	0.999616
8488	ssa-miR-16c-5p	miR-16c-5p	0	1.91066	0	0.83282	0.783876	5.81677	0	1.28442	1.32857	2.0322	0.723205	1.4697	2.76964	0.469554	0.999616
23865	ppy-mir-3617	mir-3617	0	1.91066	0	5.82974	0	0.581677	2.16594	0	1.311	2.15829	-0.723087	-1.56063	0.339003	0.469626	0.999616
17688	gga-mir-6559	mir-6559	3.15762	15.2853	3.25589	8.3282	7.83876	6.39845	4.33187	38.5327	10.8911	1.24535	0.723026	0.900419	1.86661	0.469664	0.999616
22587	osa-MIR172d	MIR172d	14.7356	11.464	9.76768	15.8236	14.8936	25.5938	19.4934	26.9729	17.3431	1.02706	0.722444	0.74199	1.67248	0.470022	0.999616
24950	sko-miR-252b-3p	miR-252b-3p	25.2609	21.0173	35.8148	19.9877	0	0	32.489	15.4131	18.7479	1.52474	-0.722294	-1.10131	0.466093	0.470114	0.999616
3175	aqc-MIR166b	MIR166b	1.05254	0.95533	1.62795	1.66564	1.56775	0.581677	3.2489	6.42211	2.14024	1.54664	0.72229	1.11712	2.16914	0.470116	0.999616
34685	piR-hsa-216	piR-hsa-216	1.05254	3.82132	0	0	1.56775	1.16335	5.41484	3.85327	2.10913	1.70244	0.722154	1.22942	2.34473	0.4702	0.999616
34170	piR-hsa-19174	piR-hsa-19174	3.15762	0	3.25589	1.66564	0.783876	1.16335	1.08297	0	1.38867	1.83814	-0.721975	-1.32709	0.398572	0.47031	0.999616
29555	cbn-miR-44-2-5p	miR-44-2-5p	5.2627	3.82132	0	3.33128	4.70325	9.30684	9.74671	1.28442	4.68207	1.37037	0.721918	0.989297	1.98522	0.470345	0.999616
2862	mmu-miR-6367-5p	miR-6367-5p	1.05254	4.77665	6.51179	0	0.783876	1.16335	2.16594	1.28442	2.21732	1.62404	-0.721903	-1.1724	0.443683	0.470354	0.999616
31889	piR-hsa-10453	piR-hsa-10453	5.2627	6.68731	1.62795	6.66256	3.1355	2.90839	2.16594	2.56885	3.8774	1.27853	-0.721837	-0.922891	0.527451	0.470395	0.999616
23379	ppc-mir-2253b	mir-2253b	4.21016	1.91066	1.62795	0	0.783876	0	1.08297	1.28442	1.3625	1.9032	-0.721582	-1.37332	0.386003	0.470551	0.999616
6140	hsa-miR-6729-5p	miR-6729-5p	2.10508	0.95533	3.25589	1.66564	2.35163	0.581677	0	0	1.36441	1.84131	-0.721455	-1.32842	0.398204	0.470629	0.999616
7475	osa-MIR1864-5p	MIR1864-5p	2.10508	2.86599	1.62795	1.66564	0.783876	0.581677	0	17.9819	3.45152	1.63916	0.720535	1.18107	2.26745	0.471196	0.999616
2149	mmu-miR-883a-3p	miR-883a-3p	1.05254	7.64264	1.62795	6.66256	8.62263	16.8686	3.2489	3.85327	6.19739	1.29435	0.720261	0.932271	1.90828	0.471364	0.999616
24065	ptc-MIR156l	MIR156l	0	0.95533	1.62795	0.83282	3.1355	1.74503	3.2489	0	1.44319	1.83522	0.720073	1.32149	2.49924	0.47148	0.999616
12892	bdi-miR7777-3p.2	miR7777-3p.2	0	0.95533	0	1.66564	0.783876	0	1.08297	6.42211	1.36374	2.05788	0.719746	1.48115	2.79172	0.471682	0.999616
16423	ebv-mir-BART17	mir-BART17	0	1.91066	1.62795	0	3.1355	0.581677	1.08297	3.85327	1.524	1.84966	0.71919	1.33026	2.51447	0.472024	0.999616
14351	ccr-miR-143-3p	miR-143-3p	0	0	0	12.4923	0	17.4503	18.4105	0	6.04414	2.0795	0.719133	1.49544	2.8195	0.472059	0.999616
31576	piR-hsa-17456	piR-hsa-17456	8.42032	4.77665	4.88384	0.83282	10.9743	2.32671	12.9956	8.99096	6.77515	1.25325	0.719007	0.901095	1.86748	0.472137	0.999616
25326	ssa-miR-196a-1-5p	miR-196a-1-5p	0	0	0	2.49846	0	0	9.74671	0	1.53065	2.53219	0.718415	1.81916	3.52876	0.472501	0.999616
1704	mmu-miR-6516-3p	miR-6516-3p	1.05254	0	1.62795	3.33128	4.70325	2.32671	2.16594	3.85327	2.38262	1.53398	0.718039	1.10145	2.14571	0.472733	0.999616
1453	mmu-miR-30b-3p	miR-30b-3p	0	72.6051	0	0	0	107.61	114.795	0	36.8762	2.24766	0.717602	1.61293	3.05872	0.473002	0.999616
5367	gga-mir-1587	mir-1587	5.2627	2.86599	0	3.33128	3.1355	0.581677	2.16594	19.2663	4.57618	1.497	0.717221	1.07368	2.1048	0.473238	0.999616
20361	lus-MIR396a	MIR396a	2.10508	4.77665	4.88384	0.83282	0.783876	0.581677	4.33187	0	2.28698	1.60451	-0.717211	-1.15077	0.450384	0.473244	0.999616
37988	piR-hsa-719	piR-hsa-719	0	1.91066	1.62795	0	0	2.90839	1.08297	5.13769	1.58346	1.96022	0.716763	1.40501	2.6482	0.47352	0.999616
15436	crm-mir-66	mir-66	1.05254	2.86599	8.13973	1.66564	0.783876	1.16335	3.2489	1.28442	2.52556	1.48067	-0.716721	-1.06123	0.479224	0.473546	0.999616
721	cgr-miR-412-5p	miR-412-5p	130.515	134.701	0	0	166.182	132.622	181.939	102.754	106.089	1.58595	0.716668	1.1366	2.19862	0.473579	0.999616
910	efu-miR-205-5p	miR-205-5p	62.0998	2780.01	3334.03	57.4646	2858.01	3574.99	2943.51	2572.7	2272.85	1.31116	0.716085	0.938902	1.91707	0.473939	0.999616
19124	hsa-miR-4426-5p	miR-4426-5p	5.2627	3.82132	9.76768	0	0.783876	1.16335	3.2489	3.85327	3.48764	1.4944	-0.715716	-1.06957	0.476462	0.474167	0.999616
856	eca-miR-106a-5p	miR-106a-5p	5.2627	7.64264	6.51179	0.83282	10.1904	7.5618	10.8297	7.70654	7.06729	1.1969	0.715127	0.855933	1.80993	0.474531	0.999616
3278	ath-MIR5651	MIR5651	3.15762	3.82132	1.62795	0.83282	0.783876	1.16335	2.16594	0	1.69411	1.65465	-0.714876	-1.18287	0.440475	0.474685	0.999616
1674	mmu-miR-5620-5p	miR-5620-5p	3.15762	0	0	0	0.783876	1.74503	2.16594	3.85327	1.46322	1.95303	0.713408	1.39331	2.6268	0.475593	0.999616
149	aca-miR-32-5p	miR-32-5p	0	0	166.051	280.66	247.705	272.225	235.004	249.178	181.353	1.63859	0.713167	1.16859	2.24792	0.475742	0.999616
20026	hsv1-mir-H11	#NAME?	0	1.91066	1.62795	1.66564	2.35163	1.16335	5.41484	2.56885	2.08786	1.57842	0.712316	1.12433	2.18001	0.476269	0.999616
26128	tni-mir-30b	mir-30b	1.05254	1.91066	0	0.83282	6.271	0	2.16594	1.28442	1.68967	1.82648	0.712227	1.30087	2.46378	0.476324	0.999616
19799	hsa-mir-4687	mir-4687	2.10508	0	1.62795	0	0	4.65342	3.2489	1.28442	1.61497	1.9497	0.711817	1.38783	2.61685	0.476578	0.999616
40784	HBII-108	-108	4.21016	1.91066	1.62795	4.99692	6.271	2.90839	8.66375	6.42211	4.62637	1.25548	0.711666	0.893486	1.85766	0.476672	0.999616
6189	hsa-miR-7160-5p	miR-7160-5p	1.05254	0	6.51179	4.99692	0	1.74503	3.2489	0	2.1944	1.82994	-0.711354	-1.30173	0.405638	0.476865	0.999616
17770	ggo-miR-495-5p	miR-495-5p	1.05254	9.5533	0	0.83282	2.35163	1.16335	0	1.28442	2.02976	1.76847	-0.710328	-1.2562	0.418647	0.477501	0.999616
40909	U38A		89.4659	187.245	151.399	71.6225	90.1457	82.0165	463.51	209.361	168.096	1.06667	0.710205	0.757551	1.69062	0.477577	0.999616
6617	mdo-miR-7287-5p	miR-7287-5p	0	0.95533	0	3.33128	0.783876	2.90839	3.2489	3.85327	1.88513	1.72122	0.710132	1.22229	2.33317	0.477622	0.999616
12905	bfl-miR-2058-5p	miR-2058-5p	3.15762	5.73198	3.25589	4.1641	1.56775	2.32671	2.16594	2.56885	3.11735	1.31598	-0.709723	-0.933981	0.523412	0.477876	0.999616
39113	piR-hsa-16414	piR-hsa-16414	3.15762	1.91066	1.62795	0.83282	3.1355	3.49006	4.33187	3.85327	2.79247	1.37781	0.709309	0.977294	1.96877	0.478133	0.999616
38338	piR-hsa-8919	piR-hsa-8919	27.366	15.2853	19.5354	9.16102	14.8936	8.72516	12.9956	5.13769	14.1375	1.08056	-0.708418	-0.765485	0.588255	0.478686	0.999616
9	aae-miR-125-5p	miR-125-5p	3.15762	6.68731	1.62795	4.99692	0	3.49006	3.2489	1.28442	3.06165	1.47369	-0.708413	-1.04398	0.484988	0.478689	0.999616
11252	ssa-mir-200a-1	mir-200a-1	0	1.91066	0	0.83282	2.35163	0.581677	0	5.13769	1.35181	2.0115	0.708232	1.42461	2.68442	0.478801	0.999616
1945	mmu-miR-7026-3p	miR-7026-3p	2.10508	0.95533	0	1.66564	2.35163	2.32671	1.08297	5.13769	1.95313	1.59087	0.708119	1.12653	2.18333	0.478871	0.999616
20022	hsv1-miR-H6-3p	-miR-H6-3p	31.5762	31.5259	9.76768	11.6595	31.355	18.032	49.8165	43.6704	28.4254	1.05985	0.707802	0.750166	1.68199	0.479068	0.999616
26401	zma-MIR2118d-5p	MIR2118d-5p	0	0	3.25589	0	0	0.581677	4.33187	2.56885	1.34229	2.20827	0.707632	1.56264	2.95395	0.479174	0.999616
22318	odi-let-7d	let-7d	0	1.91066	1.62795	0.83282	3.91938	3.49006	0	2.56885	1.79371	1.74537	0.707323	1.23454	2.35306	0.479366	0.999616
15914	dmo-miR-283-3p	miR-283-3p	4.21016	0	1.62795	2.49846	7.83876	4.65342	3.2489	1.28442	3.17026	1.47619	0.707288	1.04409	2.06207	0.479387	0.999616
39641	piR-hsa-22608	piR-hsa-22608	9.47286	4.77665	0	6.66256	2.35163	2.32671	5.41484	0	3.87566	1.50387	-0.706652	-1.06271	0.478731	0.479782	0.999616
12270	asu-mir-67	mir-67	1.05254	85.0243	39.0707	0	90.1457	88.9966	0	107.891	51.5227	1.69773	0.70599	1.19858	2.29514	0.480194	0.999616
25487	ssc-mir-194a	mir-194a	10.5254	0.95533	14.6515	13.3251	0.783876	1.74503	1.08297	16.6975	7.47084	1.40557	-0.70559	-0.991758	0.502865	0.480443	0.999616
2090	mmu-miR-7668-3p	miR-7668-3p	1.05254	0	1.62795	0.83282	0.783876	2.32671	1.08297	3.85327	1.44502	1.76621	0.70526	1.24564	2.37123	0.480648	0.999616
24569	rno-miR-1956-5p	miR-1956-5p	4.21016	0	0	0	0	0	7.58078	5.13769	2.11608	2.20842	0.705017	1.55697	2.94236	0.4808	0.999616
20917	mml-miR-6134-3p	miR-6134-3p	2.10508	0	4.88384	3.33128	1.56775	0.581677	2.16594	0	1.82945	1.73581	-0.704992	-1.22373	0.428173	0.480815	0.999616
30482	hsa-miR-3612-5p	miR-3612-5p	55.7846	388.819	39.0707	210.704	253.192	185.555	36.8209	789.92	244.983	1.22686	0.704705	0.864578	1.82081	0.480994	0.999616
27010	cme-MIR319d-5p	MIR319d-5p	1.05254	4.77665	3.25589	1.66564	2.35163	1.16335	0	1.28442	1.94377	1.60071	-0.704615	-1.12788	0.457587	0.48105	0.999616
18087	gma-MIR398d	MIR398d	0	2.86599	11.3956	0.83282	0.783876	4.07174	3.2489	23.1196	5.78982	1.5408	0.704208	1.08504	2.12144	0.481303	0.999616
4879	eca-mir-9108	mir-9108	3.15762	5.73198	1.62795	4.1641	0	0.581677	0	6.42211	2.71068	1.6671	-0.704086	-1.17378	0.443259	0.481379	0.999616
29761	eca-miR-9052-2-5p	miR-9052-2-5p	1.05254	0.95533	1.62795	0	0.783876	0.581677	3.2489	3.85327	1.51294	1.7755	0.70376	1.24953	2.37764	0.481582	0.999616
11970	ame-miR-6050-3p	miR-6050-3p	4.21016	5.73198	0	1.66564	4.70325	1.16335	6.49781	11.5598	4.4415	1.40633	0.703234	0.988978	1.98478	0.48191	0.999616
7982	ppy-mir-621	mir-621	2.10508	27.7046	1.62795	11.6595	14.1098	5.2351	5.41484	59.0834	15.8675	1.33562	0.703161	0.939159	1.91741	0.481956	0.999616
11099	rgl-MIR5574-5p	MIR5574-5p	1.05254	3.82132	0	0	1.56775	0.581677	8.66375	1.28442	2.12143	1.7776	0.702855	1.24939	2.37741	0.482146	0.999616
21364	mmu-mir-6353	mir-6353	0	1.91066	0	0.83282	1.56775	2.32671	0	3.85327	1.3114	1.97741	0.702557	1.38925	2.61942	0.482332	0.999616
618	cfa-miR-802-5p	miR-802-5p	0	5.73198	0	2.49846	2.35163	11.0519	2.16594	2.56885	3.29609	1.5868	0.702064	1.11404	2.1645	0.482639	0.999616
22545	osa-MIR156e	MIR156e	2.10508	0	11.3956	1.66564	0	1.16335	0	5.13769	2.68342	1.83188	-0.701469	-1.28501	0.410368	0.48301	0.999616
26437	aca-miR-1388-3p	miR-1388-3p	0	1.91066	1.62795	2.49846	6.271	1.74503	1.08297	3.85327	2.37367	1.55193	0.701244	1.08828	2.12621	0.483151	0.999616
2692	tch-miR-152-5p	miR-152-5p	2.10508	0	4.88384	2.49846	0.783876	1.74503	0	1.28442	1.66259	1.77269	-0.700054	-1.24098	0.423085	0.483894	0.999616
35200	piR-hsa-23905	piR-hsa-23905	0	3.82132	4.88384	0	3.91938	1.16335	10.8297	2.56885	3.3983	1.61291	0.699569	1.12834	2.18607	0.484196	0.999616
20846	mml-miR-1235-5p	miR-1235-5p	3.15762	4.77665	0	9.99384	2.35163	1.16335	4.33187	1.28442	3.38242	1.45683	-0.699534	-1.0191	0.493423	0.484218	0.999616
1906	mmu-miR-6998-3p	miR-6998-3p	10.5254	4.77665	9.76768	4.99692	1.56775	1.16335	7.58078	6.42211	5.85008	1.25028	-0.699483	-0.874548	0.545425	0.48425	0.999616
8621	tae-MIR9662b	MIR9662b	2.10508	2.86599	0	4.1641	3.1355	3.49006	2.16594	10.2754	3.52526	1.41318	0.698895	0.987665	1.98297	0.484618	0.999616
3652	bmo-mir-79	mir-79	3.15762	0	0	0.83282	1.56775	2.32671	0	6.42211	1.78838	1.88567	0.697474	1.31521	2.48838	0.485506	0.999616
11816	aly-MIR4238	MIR4238	12.6305	0.95533	4.88384	8.3282	5.48713	2.90839	2.16594	3.85327	5.15157	1.28482	-0.697444	-0.896088	0.537342	0.485525	0.999616
30089	ppc-mir-2239-2	mir-2239-2	2.10508	5.73198	4.88384	3.33128	3.1355	6.98013	15.1616	3.85327	5.64783	1.23762	0.697099	0.86274	1.81849	0.485741	0.999616
19902	hsa-mir-6130	mir-6130	0	0.95533	0	7.49538	8.62263	0	4.33187	7.70654	3.63897	1.76063	0.695575	1.22465	2.33699	0.486695	0.999616
2973	aca-mir-129b	mir-129b	1.05254	4.77665	1.62795	4.99692	3.1355	2.90839	5.41484	12.8442	4.59463	1.31161	0.694832	0.911347	1.8808	0.487161	0.999616
6310	hsa-mir-4674	mir-4674	44.2067	163.361	21.1633	126.589	143.449	107.61	87.7204	262.022	119.515	1.08652	0.694831	0.754946	1.68757	0.487161	0.999616
12526	atr-MIR396b	MIR396b	9.47286	1.91066	0	0.83282	2.35163	1.16335	11.9127	10.2754	4.73992	1.49017	0.69483	1.03541	2.0497	0.487162	0.999616
1613	mmu-miR-496a-5p	miR-496a-5p	6.31524	0.95533	0	3.33128	3.91938	0	0	0	1.81515	2.0311	-0.694019	-1.40963	0.376409	0.48767	0.999616
4085	cfa-miR-8873b-5p	miR-8873b-5p	1.05254	0	1.62795	1.66564	2.35163	1.16335	1.08297	5.13769	1.76022	1.66993	0.69307	1.15738	2.23052	0.488266	0.999616
20912	mml-miR-604-5p	miR-604-5p	13.683	9.5533	13.0236	4.1641	2.35163	6.98013	9.74671	3.85327	7.91946	1.16884	-0.692681	-0.80963	0.570528	0.48851	0.999616
30586	hsa-miR-92a-1-5p	miR-92a-1-5p	3.15762	1.91066	3.25589	2.49846	3.91938	3.49006	8.66375	3.85327	3.84364	1.27715	0.692319	0.884194	1.84573	0.488737	0.999616
23733	ppt-MIR902e	MIR902e	2.10508	1.91066	6.51179	4.1641	0	2.90839	0	3.85327	2.68166	1.6083	-0.692239	-1.11333	0.462226	0.488787	0.999616
10888	pma-mir-4579	mir-4579	0	46.8112	65.1179	24.1518	0	26.7572	0	32.1106	24.3686	1.74663	-0.691569	-1.20792	0.432894	0.489208	0.999616
25138	sme-lin-4-5p	lin-4-5p	0	0.95533	1.62795	3.33128	3.1355	3.49006	3.2489	2.56885	2.29473	1.53111	0.691041	1.05806	2.08213	0.48954	0.999616
9530	crm-miR-58a-3p	miR-58a-3p	9.47286	24.8386	14.6515	17.4892	27.4356	14.5419	29.2401	38.5327	22.0253	1.03804	0.690836	0.717119	1.6439	0.489668	0.999616
11672	aga-mir-279	mir-279	1.05254	1.91066	1.62795	0	3.1355	2.90839	1.08297	2.56885	1.78586	1.64108	0.690741	1.13356	2.19399	0.489728	0.999616
2003	mmu-miR-7070-5p	miR-7070-5p	4.21016	1.91066	9.76768	1.66564	0.783876	1.16335	3.2489	3.85327	3.32544	1.39579	-0.690586	-0.963916	0.512664	0.489826	0.999616
17238	gga-miR-1560-5p	miR-1560-5p	14.7356	8.59797	13.0236	7.49538	5.48713	9.30684	4.33187	6.42211	8.67505	1.10783	-0.690426	-0.764874	0.588505	0.489927	0.999616
1848	mmu-miR-6955-5p	miR-6955-5p	4.21016	2.86599	1.62795	3.33128	1.56775	1.16335	2.16594	1.28442	2.2771	1.43299	-0.6902	-0.989051	0.503809	0.490068	0.999616
2946	aca-miR-1397-5p	miR-1397-5p	3.15762	3.82132	1.62795	0.83282	1.56775	0.581677	1.08297	1.28442	1.74457	1.57897	-0.690191	-1.08979	0.469829	0.490074	0.999616
23411	ppc-mir-8241	mir-8241	2.10508	0	0	0.83282	0	0	7.58078	1.28442	1.47539	2.1877	0.689981	1.50947	2.84706	0.490206	0.999616
40737	U61		2.10508	2.86599	3.25589	4.1641	5.48713	5.2351	6.49781	5.13769	4.3436	1.22754	0.689897	0.846879	1.79861	0.490259	0.999616
34767	piR-hsa-21988	piR-hsa-21988	19.9983	0.95533	32.5589	0	0	0	20.5764	0	9.26111	2.00314	-0.689849	-1.38186	0.383723	0.490289	0.999616
22494	ola-mir-101b	mir-101b	0	1.91066	3.25589	3.33128	0	0	3.2489	0	1.46834	2.09927	-0.689556	-1.44756	0.36664	0.490474	0.999616
39940	piR-hsa-2716	piR-hsa-2716	1.05254	2.86599	3.25589	1.66564	0.783876	1.74503	0	1.28442	1.58167	1.67299	-0.689078	-1.15282	0.449745	0.490774	0.999616
6928	mmu-mir-6362	mir-6362	3.15762	4.77665	4.88384	0	0.783876	0.581677	4.33187	0	2.31444	1.70483	-0.68803	-1.17297	0.443507	0.491434	0.999616
78	aca-miR-146a-5p	miR-146a-5p	9.47286	23.8832	37.4428	13.3251	11.7581	5.81677	11.9127	20.5508	16.7703	1.09336	-0.687947	-0.752176	0.593707	0.491486	0.999616
23186	pmi-miR-242-3p	miR-242-3p	0	0	0	3.33128	0	0	5.41484	5.13769	1.73548	2.24985	0.687842	1.54754	2.92318	0.491552	0.999616
1301	mmu-miR-193a-5p	miR-193a-5p	26.3135	9.5533	13.0236	24.1518	10.1904	0	14.0786	15.4131	14.0905	1.30396	-0.687205	-0.89609	0.537341	0.491954	0.999616
22705	osa-MIR395j	MIR395j	0	2.86599	0	0	0	0.581677	5.41484	2.56885	1.42892	2.15206	0.686546	1.47748	2.78463	0.492369	0.999616
1790	mmu-miR-6911-5p	miR-6911-5p	1.05254	0.95533	8.13973	1.66564	1.56775	1.16335	0	2.56885	2.13915	1.62188	-0.686406	-1.11327	0.462246	0.492457	0.999616
5772	gra-MIR8654a	MIR8654a	2.10508	1.91066	0	1.66564	0	1.16335	1.08297	11.5598	2.43594	1.73509	0.685919	1.19013	2.28173	0.492764	0.999616
29813	efu-mir-9256a-2	mir-9256a-2	2.10508	1.91066	3.25589	0	2.35163	2.32671	2.16594	7.70654	2.7278	1.50504	0.685797	1.03215	2.04508	0.492841	0.999616
11122	rno-miR-3587-5p	miR-3587-5p	1.05254	0	1.62795	2.49846	3.91938	1.16335	1.08297	5.13769	2.06029	1.61657	0.684984	1.10733	2.15446	0.493354	0.999616
3825	bta-mir-2298	mir-2298	0	4.77665	0	0	0	0	12.9956	1.28442	2.38209	2.23392	0.68482	1.52983	2.88752	0.493457	0.999616
20704	mdo-mir-7383-1	mir-7383-1	10.5254	0	4.88384	0.83282	0	0	3.2489	3.85327	2.91803	1.83287	-0.681362	-1.24885	0.420784	0.495642	0.999616
22289	oan-mir-92b	mir-92b	8.42032	8.59797	8.13973	9.99384	2.35163	7.5618	5.41484	5.13769	6.95223	1.14198	-0.68132	-0.778055	0.583153	0.495669	0.999616
32533	piR-hsa-12738	piR-hsa-12738	1.05254	3.82132	3.25589	4.1641	0	2.32671	3.2489	0	2.23368	1.64931	-0.68088	-1.12298	0.459145	0.495947	0.999616
34366	piR-hsa-20155	piR-hsa-20155	3.15762	4.77665	8.13973	0	0	0.581677	4.33187	2.56885	2.94455	1.65775	-0.680719	-1.12846	0.457402	0.496049	0.999616
19728	hsa-mir-4255	mir-4255	2.10508	5.73198	1.62795	0	0	0	0	3.85327	1.66478	2.09862	-0.680335	-1.42777	0.371706	0.496292	0.999616
2830	hsa-miR-4449-5p	miR-4449-5p	3.15762	0.95533	1.62795	2.49846	1.56775	1.16335	8.66375	5.13769	3.09649	1.41948	0.680334	0.965721	1.95304	0.496293	0.999616
13500	bmo-mir-3294	mir-3294	3.15762	0	0	0	0	0	3.2489	6.42211	1.60358	2.29005	0.680236	1.55777	2.94399	0.496355	0.999616
34101	piR-hsa-18901	piR-hsa-18901	2.10508	4.77665	8.13973	3.33128	5.48713	11.0519	9.74671	5.13769	6.22202	1.19069	0.679602	0.809192	1.75223	0.496756	0.999616
39698	piR-hsa-23535	piR-hsa-23535	18.9457	11.464	11.3956	9.99384	0.783876	17.4503	8.66375	0	9.83713	1.36115	-0.678813	-0.923964	0.527059	0.497256	0.999616
37616	piR-hsa-5562	piR-hsa-5562	2.10508	0	0	1.66564	0	2.32671	1.08297	6.42211	1.70031	1.91205	0.678463	1.29726	2.45761	0.497478	0.999616
13540	bmo-mir-3410	mir-3410	1.05254	0	3.25589	4.1641	0	0	3.2489	0	1.46518	2.12668	-0.677836	-1.44154	0.368174	0.497876	0.999616
6742	mml-mir-518c	mir-518c	2.10508	11.464	1.62795	0	2.35163	0.581677	27.0742	2.56885	5.97167	1.59175	0.677806	1.0789	2.11242	0.497894	0.999616
11130	rno-mir-3550	mir-3550	6.31524	7.64264	6.51179	0.83282	2.35163	1.16335	6.49781	1.28442	4.07496	1.36088	-0.677786	-0.922385	0.527636	0.497907	0.999616
33725	piR-hsa-17234	piR-hsa-17234	1.05254	9.5533	1.62795	0	1.56775	0.581677	1.08297	2.56885	2.25438	1.66674	-0.675957	-1.12664	0.45798	0.499068	0.999616
22588	osa-MIR1846c	MIR1846c	3.15762	1.91066	3.25589	0.83282	0.783876	1.16335	1.08297	1.28442	1.68395	1.5793	-0.675297	-1.0665	0.477476	0.499487	0.999616
10325	hsa-mir-6736	mir-6736	9.47286	3.82132	8.13973	8.3282	7.05488	3.49006	5.41484	0	5.71524	1.30055	-0.675163	-0.878085	0.544089	0.499572	0.999616
10551	mmu-mir-1668	mir-1668	0	2.86599	4.88384	0.83282	0	1.16335	2.16594	0	1.48899	1.94835	-0.675065	-1.31526	0.401853	0.499634	0.999616
264	bdi-MIR5178	MIR5178	0	0.95533	1.62795	2.49846	0.783876	1.16335	5.41484	3.85327	2.03713	1.63209	0.675035	1.10172	2.1461	0.499654	0.999616
109	aca-miR-200b-5p	miR-200b-5p	0	6.68731	0	10.8267	10.1904	12.7969	15.1616	0	6.95785	1.631	0.674749	1.10052	2.14431	0.499836	0.999616
5018	efu-mir-33	mir-33	7.36778	6.68731	6.51179	9.16102	3.91938	5.2351	4.33187	3.85327	5.88344	1.15017	-0.674464	-0.775749	0.584085	0.500016	0.999616
30908	piR-hsa-11256	piR-hsa-11256	0	3.82132	1.62795	1.66564	1.56775	3.49006	4.33187	5.13769	2.70529	1.48831	0.674212	1.00343	2.00477	0.500176	0.999616
18854	hme-mir-33-1	mir-33-1	1.05254	6.68731	0	2.49846	0	0	3.2489	1.28442	1.84645	1.90407	-0.674126	-1.28358	0.410774	0.500231	0.999616
8698	tgu-miR-30e-5p	miR-30e-5p	2.10508	0.95533	4.88384	1.66564	1.56775	0.581677	1.08297	1.28442	1.76584	1.57704	-0.673665	-1.0624	0.478836	0.500524	0.999616
16632	eca-miR-9138-5p	miR-9138-5p	3.15762	2.86599	3.25589	0	0	0.581677	3.2489	0	1.63876	1.91571	-0.673372	-1.28999	0.408955	0.50071	0.999616
5627	gma-MIR168b	MIR168b	0	2.86599	4.88384	0.83282	0	0	3.2489	0	1.47894	2.12828	-0.673176	-1.43271	0.370435	0.500835	0.999616
21516	mse-mir-6101	mir-6101	0	2.86599	0	0	2.35163	0	6.49781	0	1.46443	2.30055	0.673147	1.54861	2.92535	0.500854	0.999616
15797	dme-miR-4969-5p	miR-4969-5p	1.05254	3.82132	9.76768	3.33128	3.91938	2.32671	0	2.56885	3.34847	1.4563	-0.672965	-0.980038	0.506966	0.500969	0.999616
2479	pma-miR-210-3p	miR-210-3p	6.31524	2.86599	1.62795	7.49538	7.05488	11.0519	6.49781	7.70654	6.32696	1.19155	0.671954	0.800669	1.74191	0.501613	0.999616
21119	mmu-miR-3090-5p	miR-3090-5p	0	1.91066	4.88384	0.83282	0.783876	2.32671	4.33187	7.70654	2.84704	1.54813	0.671038	1.03885	2.05459	0.502196	0.999616
682	cgr-miR-26a-5p	miR-26a-5p	1.05254	1.91066	0	1.66564	1.56775	1.16335	6.49781	1.28442	1.89277	1.63187	0.671015	1.09501	2.13615	0.502211	0.999616
25051	sma-let-7	let-7	0	3.82132	0	0	3.1355	0.581677	2.16594	3.85327	1.69471	1.90206	0.670529	1.27539	2.42064	0.502521	0.999616
7947	ppy-miR-638-5p	miR-638-5p	5.2627	13.3746	11.3956	8.3282	8.62263	5.81677	1.08297	6.42211	7.5382	1.18663	-0.67002	-0.795066	0.576317	0.502845	0.999616
14778	cgr-let-7b-3p	let-7b-3p	4.21016	3.82132	1.62795	4.1641	7.05488	3.49006	2.16594	12.8442	4.92233	1.26828	0.670019	0.849773	1.80222	0.502846	0.999616
2766	bta-miR-2892-3p	miR-2892-3p	108.412	262.716	24.4192	191.549	167.749	109.937	308.646	391.749	195.647	1.09797	0.668887	0.73442	1.66373	0.503568	0.999616
15694	der-mir-305	mir-305	16.8406	33.4365	16.2795	63.2943	48.6003	44.2075	27.0742	93.7628	42.937	1.06423	0.668744	0.711695	1.63773	0.503659	0.999616
26066	tgu-mir-1397	mir-1397	3.15762	1.91066	3.25589	0	0.783876	0.581677	1.08297	1.28442	1.50714	1.73634	-0.668449	-1.16066	0.447309	0.503847	0.999616
14571	cel-mir-58b	mir-58b	13.683	0	0	0	0	8.72516	15.1616	8.99096	5.82009	1.87703	0.668074	1.254	2.38501	0.504086	0.999616
12134	api-mir-1000	mir-1000	4.21016	1.91066	3.25589	0.83282	3.1355	1.16335	0	0	1.81355	1.72274	-0.667719	-1.15031	0.450529	0.504313	0.999616
20	aae-miR-7-5p	miR-7-5p	1.05254	2.86599	11.3956	1.66564	2.35163	0	5.41484	0	3.09328	1.66233	-0.667237	-1.10917	0.463562	0.504621	0.999616
24804	sbi-MIR399a-5p	MIR399a-5p	0	11.464	0	14.9908	7.05488	11.0519	15.1616	19.2663	9.87367	1.44212	0.666771	0.961563	1.94742	0.504919	0.999616
4155	cfa-mir-8873b	mir-8873b	2.10508	0	0	2.49846	0.783876	0	9.74671	1.28442	2.05232	1.92379	0.666591	1.28238	2.4324	0.505034	0.999616
7999	prd-miR-7937-3p	miR-7937-3p	5.2627	1.91066	0	4.99692	8.62263	5.2351	5.41484	3.85327	4.41201	1.33927	0.666144	0.892144	1.85593	0.505319	0.999616
17021	efu-mir-9186k	mir-9186k	2.10508	2.86599	3.25589	0.83282	0	1.74503	1.08297	1.28442	1.64653	1.66964	-0.666129	-1.1122	0.462589	0.505329	0.999616
22288	oan-mir-873	mir-873	0	0.95533	0	2.49846	3.1355	0	6.49781	0	1.63589	2.08569	0.665949	1.38896	2.6189	0.505444	0.999616
12084	ame-mir-929	mir-929	35.7863	31.5259	52.0943	29.9815	36.8422	37.809	0	0	28.0049	1.48782	-0.665736	-0.990497	0.503305	0.50558	0.999616
1263	mmu-miR-150-3p	miR-150-3p	4.21016	0.95533	0	0.83282	5.48713	1.16335	1.08297	5.13769	2.35868	1.58869	0.665309	1.05697	2.08056	0.505853	0.999616
6772	mml-mir-7203	mir-7203	0	1.91066	1.62795	1.66564	1.56775	4.65342	0	5.13769	2.07039	1.69803	0.665216	1.12956	2.18792	0.505912	0.999616
26880	cel-miR-64-5p	miR-64-5p	1.05254	2.86599	1.62795	2.49846	1.56775	2.32671	5.41484	6.42211	2.97204	1.38569	0.665119	0.92165	1.89428	0.505975	0.999616
40923	mgh18S-121	8S-121	2.10508	0	6.51179	0	2.35163	0.581677	0	0	1.44377	2.13936	-0.664753	-1.42215	0.373156	0.506208	0.999616
34939	piR-hsa-2282	piR-hsa-2282	1.05254	2.86599	3.25589	1.66564	0.783876	0	2.16594	1.28442	1.63429	1.69226	-0.664609	-1.12469	0.458601	0.506301	0.999616
22683	osa-MIR2873c-5p	MIR2873c-5p	3.15762	0.95533	1.62795	0	2.35163	0	6.49781	3.85327	2.30545	1.72434	0.664574	1.14595	2.21293	0.506323	0.999616
32760	piR-hsa-13433	piR-hsa-13433	4.21016	1.91066	11.3956	0.83282	2.35163	1.16335	5.41484	0	3.40989	1.50724	-0.664363	-1.00135	0.499532	0.506458	0.999616
23677	ppt-MIR166j	MIR166j	2.10508	0.95533	1.62795	0.83282	1.56775	0	6.49781	3.85327	2.18	1.64511	0.664155	1.09261	2.13259	0.506591	0.999616
22703	osa-MIR395i	MIR395i	0	3.82132	0	0	0.783876	2.90839	3.2489	2.56885	1.66642	1.89154	0.664091	1.25616	2.38859	0.506632	0.999616
17707	gga-mir-6685	mir-6685	1.05254	0.95533	1.62795	0	2.35163	0	2.16594	3.85327	1.50083	1.86342	0.663478	1.23634	2.35599	0.507024	0.999616
13758	bta-miR-2353-3p	miR-2353-3p	1.05254	1.91066	4.88384	0.83282	0.783876	2.32671	10.8297	2.56885	3.14862	1.46802	0.663435	0.973936	1.96419	0.507052	0.999616
22253	oan-mir-190b	mir-190b	0	0.95533	0	2.49846	0	1.16335	5.41484	2.56885	1.5751	1.93657	0.66288	1.28371	2.43464	0.507408	0.999616
15184	cme-MIR169h	MIR169h	5.2627	1.91066	8.13973	6.66256	1.56775	6.39845	1.08297	2.56885	4.19921	1.31664	-0.662694	-0.87253	0.546188	0.507526	0.999616
27402	ghr-MIR7513	MIR7513	4.21016	6.68731	3.25589	9.99384	9.40651	10.4702	2.16594	20.5508	8.34257	1.20164	0.662604	0.796212	1.73654	0.507584	0.999616
39646	piR-hsa-22658	piR-hsa-22658	1.05254	2.86599	1.62795	0.83282	1.56775	1.16335	7.58078	2.56885	2.4075	1.49707	0.662423	0.991696	1.98852	0.5077	0.999616
13610	bra-MIR172c	MIR172c	6.31524	2.86599	0	5.82974	0	5.2351	0	1.28442	2.69131	1.7588	-0.662381	-1.165	0.445964	0.507727	0.999616
12509	atr-MIR164b	MIR164b	4.21016	0.95533	3.25589	0	0.783876	0.581677	2.16594	0	1.49411	1.84962	-0.662338	-1.22507	0.427776	0.507755	0.999616
2345	mmu-mir-7068	mir-7068	7.36778	12.4193	11.3956	11.6595	7.83876	6.39845	6.49781	5.13769	8.58936	1.092	-0.662101	-0.723016	0.60583	0.507907	0.999616
19033	hsa-miR-3687-1-3p	miR-3687-1-3p	4.21016	4.77665	1.62795	6.66256	2.35163	2.32671	1.08297	3.85327	3.36149	1.32974	-0.662063	-0.880371	0.543228	0.507931	0.999616
26670	bma-miR-86-5p	miR-86-5p	18.9457	0	1.62795	12.4923	0.783876	2.32671	0	12.8442	6.1276	1.65062	-0.660346	-1.08998	0.469768	0.509032	0.999616
697	cgr-miR-30b-3p	miR-30b-3p	137.883	0	195.354	104.103	108.175	0	0	78.3498	77.9829	1.86324	-0.659807	-1.22938	0.426501	0.509377	0.999616
31921	piR-hsa-10555	piR-hsa-10555	1.05254	0.95533	1.62795	0	0.783876	0.581677	5.41484	1.28442	1.46258	1.80865	0.659592	1.19297	2.28623	0.509515	0.999616
23747	ppy-miR-1254-5p	miR-1254-5p	0	2.86599	3.25589	1.66564	1.56775	0.581677	1.08297	0	1.37749	1.83718	-0.658852	-1.21043	0.432141	0.50999	0.999616
28233	ppy-mir-202	mir-202	0	2.86599	9.76768	0	0.783876	1.16335	3.2489	0	2.22873	1.86583	-0.658435	-1.22853	0.426753	0.510258	0.999616
2518	ppy-miR-378d-3p	miR-378d-3p	1.05254	3.82132	1.62795	4.99692	3.91938	5.2351	2.16594	10.2754	4.13681	1.31824	0.658343	0.867855	1.82495	0.510318	0.999616
27681	kshv-miR-K12-10a-3p	-miR-K12-10a-3p	0	0	0	4.1641	9.40651	0	0	2.56885	2.01743	2.21501	0.657647	1.4567	2.74479	0.510765	0.999616
14357	ccr-miR-181a-3p	miR-181a-3p	0	3.82132	4.88384	1.66564	0	1.16335	3.2489	0	1.84788	1.85265	-0.657384	-1.2179	0.429908	0.510934	0.999616
11719	ahy-MIR3517	MIR3517	1.05254	6.68731	1.62795	1.66564	1.56775	2.32671	0	1.28442	2.02654	1.60874	-0.657206	-1.05728	0.480539	0.511049	0.999616
1891	mmu-miR-6989-3p	miR-6989-3p	11.5779	3.82132	0	2.49846	2.35163	1.16335	2.16594	3.85327	3.42899	1.45466	-0.656035	-0.954305	0.51609	0.511802	0.999616
1659	mmu-miR-541-3p	miR-541-3p	11.5779	5.73198	17.9074	7.49538	12.542	20.3587	25.9912	10.2754	13.985	1.08482	0.655921	0.711559	1.63757	0.511875	0.999616
1697	mmu-miR-6240-5p	miR-6240-5p	371.546	3139.21	247.448	2094.54	1967.53	1553.66	480.838	6189.63	2005.55	1.21981	0.655872	0.800036	1.74114	0.511907	0.999616
1186	mdo-miR-150-5p	miR-150-5p	3.15762	3.82132	0	5.82974	0.783876	2.32671	2.16594	1.28442	2.4212	1.51665	-0.655338	-0.993921	0.502111	0.51225	0.999616
24693	rno-mir-27a	mir-27a	0	2.86599	0	1.66564	2.35163	1.16335	4.33187	2.56885	1.86842	1.69088	0.654888	1.10733	2.15447	0.51254	0.999616
5746	gra-MIR7484c-5p	MIR7484c-5p	0	2.86599	0	0	0	0	7.58078	1.28442	1.4664	2.34822	0.654816	1.53765	2.90321	0.512587	0.999616
40462	piR-hsa-6648	piR-hsa-6648	0	22.9279	0	0	7.83876	0	0	0	3.84583	2.34716	-0.654799	-1.53692	0.344621	0.512597	0.999616
19994	hsa-mir-7703	mir-7703	2.10508	9.5533	3.25589	9.16102	5.48713	6.39845	22.7423	7.70654	8.30122	1.20665	0.654225	0.789423	1.72838	0.512967	0.999616
21080	mml-mir-939	mir-939	1.05254	7.64264	1.62795	0.83282	0.783876	0	4.33187	0	2.03396	1.79892	-0.654099	-1.17667	0.442371	0.513048	0.999616
16673	eca-mir-1282	mir-1282	3.15762	4.77665	4.88384	0	1.56775	2.90839	0	1.28442	2.32233	1.65591	-0.653828	-1.08268	0.472151	0.513222	0.999616
15540	cte-miR-278-3p	miR-278-3p	1.05254	4.77665	3.25589	4.1641	0	1.16335	4.33187	1.28442	2.5036	1.54658	-0.653482	-1.01066	0.49632	0.513446	0.999616
27790	mml-miR-573-3p	miR-573-3p	0	2.86599	0	0	3.1355	0	5.41484	0	1.42704	2.30014	0.653479	1.50309	2.8345	0.513447	0.999616
17685	gga-mir-6551	mir-6551	0	0.95533	1.62795	0.83282	2.35163	0.581677	3.2489	1.28442	1.36034	1.78723	0.653402	1.16778	2.24666	0.513497	0.999616
22722	osa-MIR399a	MIR399a	1.05254	5.73198	3.25589	0.83282	3.1355	4.65342	2.16594	10.2754	3.88793	1.36464	0.653305	0.891525	1.85514	0.513559	0.999616
21170	mmu-miR-6377-3p	miR-6377-3p	2.10508	0	6.51179	0.83282	0	0.581677	3.2489	0	1.66003	1.95739	-0.65324	-1.27865	0.412182	0.513602	0.999616
6480	ipu-miR-30e-5p	miR-30e-5p	0	3.82132	0	7.49538	1.56775	2.90839	0	0	1.9741	1.96962	-0.653087	-1.28633	0.409992	0.513701	0.999616
21288	mmu-mir-1927	mir-1927	3.15762	5.73198	3.25589	0	2.35163	1.16335	1.08297	1.28442	2.25348	1.57371	-0.652998	-1.02763	0.490516	0.513757	0.999616
16440	eca-miR-1289-5p	miR-1289-5p	13.683	11.464	1.62795	0.83282	0	16.287	11.9127	25.6885	10.187	1.45939	0.652738	0.952602	1.93536	0.513925	0.999616
31537	piR-hsa-14571	piR-hsa-14571	6.31524	23.8832	4.88384	3.33128	1.56775	7.5618	6.49781	6.42211	7.55788	1.24141	-0.652676	-0.810239	0.570287	0.513965	0.999616
2070	mmu-miR-7648-5p	miR-7648-5p	4.21016	0	0	2.49846	2.35163	2.32671	3.2489	6.42211	2.63225	1.58587	0.652496	1.03477	2.04879	0.514081	0.999616
2182	mmu-mir-188	mir-188	1.05254	3.82132	1.62795	1.66564	0.783876	1.74503	1.08297	0	1.47242	1.70297	-0.652028	-1.11039	0.46317	0.514383	0.999616
17808	ggo-mir-200a	mir-200a	0	1.91066	1.62795	1.66564	0.783876	6.39845	2.16594	1.28442	1.97962	1.63745	0.651311	1.06649	2.09433	0.514846	0.999616
40748	U86		36.8389	9.5533	11.3956	6.66256	10.9743	10.4702	10.8297	6.42211	12.8933	1.12351	-0.651015	-0.73142	0.602311	0.515037	0.999616
6015	hsa-miR-3917-3p	miR-3917-3p	6.31524	2.86599	6.51179	2.49846	2.35163	1.74503	5.41484	0	3.46287	1.40921	-0.650084	-0.916108	0.529937	0.515638	0.999616
267	bdi-MIR9494	MIR9494	0	0	1.62795	4.1641	2.35163	1.74503	2.16594	6.42211	2.30959	1.66766	0.649841	1.08372	2.11949	0.515795	0.999616
19943	hsa-mir-6778	mir-6778	4.21016	0	0	0	0.783876	2.32671	4.33187	2.56885	1.77768	1.88106	0.649814	1.22234	2.33325	0.515813	0.999616
9465	chi-mir-490	mir-490	0	5.73198	3.25589	0.83282	1.56775	2.32671	0	0	1.71439	1.88598	-0.649694	-1.22531	0.427705	0.51589	0.999616
24537	rlcv-mir-rL1-4	#NAME?	2.10508	5.73198	0	0	0.783876	1.16335	0	1.28442	1.38359	1.98662	-0.649558	-1.29042	0.408831	0.515978	0.999616
8677	tch-miR-139-3p	miR-139-3p	2.10508	2.86599	3.25589	2.49846	3.1355	3.49006	8.66375	3.85327	3.7335	1.28526	0.649516	0.834798	1.78361	0.516005	0.999616
20980	mml-mir-133b	mir-133b	0	0	4.88384	0	9.40651	0.581677	0	1.28442	2.01956	2.09927	0.649328	1.36311	2.5724	0.516126	0.999616
16691	eca-mir-26a	mir-26a	0	1.91066	6.51179	0	2.35163	0.581677	0	0	1.41947	2.14222	-0.649135	-1.39059	0.381408	0.516251	0.999616
17059	efu-mir-9319	mir-9319	3.15762	2.86599	0	0.83282	0.783876	1.74503	5.41484	6.42211	2.65279	1.53524	0.64912	0.996553	1.99523	0.516261	0.999616
33192	piR-hsa-15127	piR-hsa-15127	3.15762	1.91066	8.13973	7.49538	7.05488	2.32671	1.08297	0	3.89599	1.43829	-0.649087	-0.933574	0.52356	0.516282	0.999616
2359	mmu-mir-7666	mir-7666	3.15762	0	0	0	3.1355	1.16335	2.16594	1.28442	1.36335	1.96867	0.648902	1.27747	2.42414	0.516402	0.999616
30899	piR-hsa-10380	piR-hsa-10380	0	5.73198	3.25589	1.66564	3.1355	1.74503	5.41484	10.2754	3.90303	1.4339	0.648655	0.930103	1.90541	0.516562	0.999616
25213	sme-mir-87a	mir-87a	2.10508	0.95533	1.62795	4.99692	7.05488	1.16335	0	11.5598	3.68291	1.52561	0.648601	0.989513	1.98552	0.516597	0.999616
22227	oan-mir-1420e	mir-1420e	4.21016	7.64264	0	4.99692	0	1.16335	1.08297	6.42211	3.18977	1.60997	-0.648469	-1.04401	0.484976	0.516682	0.999616
6550	lva-mir-2006	mir-2006	0	2.86599	0	1.66564	3.1355	3.49006	2.16594	1.28442	1.82594	1.69348	0.648386	1.09803	2.14062	0.516735	0.999616
33292	piR-hsa-15544	piR-hsa-15544	0	0	3.25589	1.66564	1.56775	1.74503	0	7.70654	1.99261	1.86524	0.648374	1.20937	2.31237	0.516743	0.999616
190	age-miR-15b-3p	miR-15b-3p	322.077	380.221	467.221	259.007	186.562	258.846	150.533	331.381	294.481	0.961333	-0.648337	-0.623268	0.649199	0.516767	0.999616
24257	pti-MIR5474	MIR5474	36.8389	24.8386	37.4428	25.8174	16.4614	20.9404	19.4934	23.1196	25.6191	0.990948	-0.647755	-0.641891	0.640872	0.517143	0.999616
23902	ppy-mir-566	mir-566	7.36778	0.95533	0	9.99384	7.05488	0	1.08297	0	3.30685	1.80309	-0.647593	-1.16767	0.44514	0.517248	0.999616
23630	ppt-MIR1077	MIR1077	15.7881	12.4193	1.62795	19.9877	3.1355	5.2351	4.33187	16.6975	9.90287	1.22462	-0.647384	-0.792797	0.577224	0.517384	0.999616
39836	piR-hsa-25688	piR-hsa-25688	0	6.68731	1.62795	0	0.783876	0	0	2.56885	1.4585	2.16926	-0.647022	-1.40356	0.377995	0.517617	0.999616
6685	mes-MIR477a	MIR477a	12.6305	11.464	14.6515	10.8267	12.542	9.88851	20.5764	37.2483	16.2285	1.06656	0.646519	0.689554	1.61278	0.517943	0.999616
9891	gga-miR-6683-5p	miR-6683-5p	0	6.68731	1.62795	2.49846	0.783876	0.581677	0	3.85327	2.00407	1.76158	-0.646286	-1.13848	0.454237	0.518094	0.999616
40927	HBII-52-15	-67	1.05254	2.86599	13.0236	5.82974	4.70325	2.90839	3.2489	1.28442	4.3646	1.332	-0.646278	-0.86084	0.550632	0.518099	0.999616
21337	mmu-mir-433	mir-433	3.15762	8.59797	0	0	2.35163	2.32671	0	0	2.05424	1.97186	-0.646139	-1.27409	0.413485	0.51819	0.999616
30916	piR-hsa-1243	piR-hsa-1243	8699.24	44473.5	10225.1	18452	7718.04	11211.2	90161.4	28859.7	27475	1.16564	0.646081	0.753098	1.68541	0.518227	0.999616
32582	piR-hsa-12894	piR-hsa-12894	3.15762	1.91066	0	0	2.35163	2.90839	0	6.42211	2.0938	1.80361	0.645885	1.16492	2.24221	0.518354	0.999616
5528	ggo-mir-148b	mir-148b	0	61.1411	48.8384	0	0	0	0	41.1015	18.8851	2.21255	-0.645826	-1.42892	0.371408	0.518392	0.999616
24918	sja-mir-1	mir-1	1.05254	0.95533	0	1.66564	0.783876	0	0	8.99096	1.68104	2.00628	0.645695	1.29545	2.45453	0.518477	0.999616
5317	gga-miR-6637-1-3p	miR-6637-1-3p	0	1.91066	4.88384	0.83282	0.783876	1.16335	1.08297	0	1.33219	1.87996	-0.645219	-1.21298	0.431376	0.518785	0.999616
26102	tni-miR-196b-3p	miR-196b-3p	0	1.91066	0	0.83282	0	0	5.41484	2.56885	1.3409	2.18344	0.645144	1.40863	2.65486	0.518834	0.999616
29560	cbn-miR-58a-2-3p	miR-58a-2-3p	3.15762	1.91066	3.25589	3.33128	3.91938	4.07174	8.66375	3.85327	4.02045	1.2612	0.645063	0.813554	1.75754	0.518886	0.999616
24813	sbi-MIR437q-3p	MIR437q-3p	1.05254	2.86599	0	0	1.56775	0.581677	7.58078	0	1.70609	1.94794	0.645011	1.25644	2.38906	0.51892	0.999616
6766	mml-mir-7167	mir-7167	1.05254	1.91066	3.25589	1.66564	0.783876	2.32671	0	0	1.37441	1.82355	-0.64398	-1.17433	0.443089	0.519588	0.999616
33636	piR-hsa-16879	piR-hsa-16879	8.42032	54.4538	17.9074	27.4831	33.7066	31.9923	7.58078	110.46	36.5006	1.17616	0.643724	0.757121	1.69011	0.519754	0.999616
65	aca-miR-1306-3p	miR-1306-3p	13.683	2.86599	3.25589	14.1579	5.48713	8.14348	4.33187	1.28442	6.65122	1.25332	-0.643105	-0.806019	0.571958	0.520156	0.999616
2146	mmu-miR-880-3p	miR-880-3p	3.15762	1.91066	1.62795	2.49846	3.1355	8.72516	1.08297	3.85327	3.24895	1.37109	0.64299	0.881599	1.84242	0.52023	0.999616
1805	mmu-miR-6922-5p	miR-6922-5p	3.15762	2.86599	1.62795	1.66564	0	0	3.2489	1.28442	1.73132	1.77069	-0.642931	-1.13843	0.454254	0.520269	0.999616
31070	piR-hsa-9010	piR-hsa-9010	151.566	311.437	126.98	360.611	286.898	256.52	176.524	793.773	308.039	1.04246	0.642886	0.670183	1.59127	0.520298	0.999616
36285	piR-hsa-28893	piR-hsa-28893	8.42032	3.82132	3.25589	3.33128	4.70325	5.81677	5.41484	16.6975	6.43265	1.20289	0.642742	0.773148	1.70899	0.520392	0.999616
22217	oan-mir-1377	mir-1377	1.05254	0	1.62795	1.66564	0	4.65342	2.16594	2.56885	1.71679	1.78157	0.642521	1.14469	2.21099	0.520535	0.999616
40810	U31		8.42032	3.82132	8.13973	7.49538	6.271	5.81677	1.08297	2.56885	5.45204	1.23194	-0.642223	-0.791178	0.577872	0.520729	0.999616
37246	piR-hsa-3975	piR-hsa-3975	7.36778	4.77665	0	0	0.783876	0	4.33187	0	2.15752	2.01258	-0.64187	-1.29181	0.408438	0.520958	0.999616
8068	ptc-MIR482c	MIR482c	2.10508	5.73198	0	7.49538	5.48713	12.2152	1.08297	10.2754	5.54914	1.38637	0.64179	0.889758	1.85286	0.52101	0.999616
30924	piR-hsa-15215	piR-hsa-15215	11.5779	33.4365	13.0236	33.3128	31.355	29.0839	14.0786	74.4965	30.0456	1.08708	0.64165	0.697528	1.62172	0.5211	0.999616
17003	efu-mir-452	mir-452	0	2.86599	1.62795	0	4.70325	0.581677	0	5.13769	1.86457	1.90998	0.64159	1.22542	2.33824	0.521139	0.999616
17933	gma-MIR1512b	MIR1512b	4.21016	2.86599	0	2.49846	0	1.74503	11.9127	6.42211	3.7068	1.58107	0.64121	1.0138	2.01922	0.521386	0.999616
29779	eca-mir-9089-2	mir-9089-2	2.10508	0	0	0.83282	0	3.49006	4.33187	0	1.34498	2.13944	0.640958	1.37129	2.58702	0.52155	0.999616
14728	cfa-mir-106a	mir-106a	1.05254	4.77665	0	1.66564	2.35163	3.49006	0	10.2754	2.95149	1.62618	0.640271	1.0412	2.05794	0.521996	0.999616
7771	ppc-mir-234	mir-234	1.05254	2.86599	1.62795	2.49846	1.56775	3.49006	7.58078	2.56885	2.90655	1.39403	0.640224	0.892494	1.85638	0.522027	0.999616
3078	aly-MIR771-3p	MIR771-3p	0	0.95533	3.25589	0	1.56775	2.32671	3.2489	1.28442	1.57988	1.80168	0.640206	1.15345	2.22445	0.522038	0.999616
8073	ptc-MIR6426a	MIR6426a	1.05254	0.95533	6.51179	0.83282	0	1.74503	2.16594	0	1.65793	1.81686	-0.639552	-1.16197	0.4469	0.522464	0.999616
8827	zma-MIR162	MIR162	0	1.91066	3.25589	3.33128	0	2.32671	1.08297	0	1.48844	1.91948	-0.639504	-1.22751	0.427052	0.522495	0.999616
12574	atr-MIR8602-5p	MIR8602-5p	0	0.95533	6.51179	0.83282	0	0	2.16594	1.28442	1.46879	2.03034	-0.63884	-1.29707	0.406953	0.522927	0.999616
428	bta-miR-381-5p	miR-381-5p	1.05254	2.86599	0	0	6.271	0	0	3.85327	1.75535	2.07555	0.6385	1.32524	2.50575	0.523148	0.999616
18470	gra-MIR8771e	MIR8771e	3.15762	0	8.13973	0	0.783876	0	0	3.85327	1.99181	2.06644	-0.63827	-1.31894	0.400828	0.523298	0.999616
8609	tae-MIR395b	MIR395b	0	11.464	4.88384	1.66564	0	2.90839	2.16594	3.85327	3.36763	1.61263	-0.638093	-1.02901	0.490047	0.523413	0.999616
31017	piR-hsa-28392	piR-hsa-28392	0	0	13.0236	0	0	0	18.4105	14.1286	5.69533	2.13597	0.638066	1.36289	2.572	0.523431	0.999616
36407	piR-hsa-29376	piR-hsa-29376	3.15762	0	0	0	0	0	6.49781	2.56885	1.52803	2.31003	0.637981	1.47376	2.77744	0.523486	0.999616
24606	rno-miR-3584-1-5p	miR-3584-1-5p	3.15762	2.86599	3.25589	0	0	1.74503	2.16594	0	1.64881	1.87618	-0.637557	-1.19617	0.436431	0.523762	0.999616
16910	efu-miR-9278-3p	miR-9278-3p	1.05254	3.82132	3.25589	0	0.783876	0.581677	2.16594	0	1.45765	1.85211	-0.637237	-1.18023	0.44128	0.52397	0.999616
18016	gma-MIR167i	MIR167i	2.10508	1.91066	8.13973	1.66564	2.35163	1.16335	1.08297	2.56885	2.62349	1.43338	-0.63625	-0.91199	0.531451	0.524613	0.999616
14712	cfa-miR-8895-3p	miR-8895-3p	150.513	96.4883	48.8384	69.1241	126.988	98.8851	174.358	164.406	116.2	0.987207	0.63621	0.628071	1.5455	0.52464	0.999616
19611	hsa-miR-8089-3p	miR-8089-3p	1.05254	3.82132	3.25589	2.49846	3.1355	4.07174	6.49781	5.13769	3.68387	1.29447	0.636101	0.823413	1.76959	0.524711	0.999616
16244	dre-mir-499	mir-499	2.10508	1.91066	0	0	2.35163	0	1.08297	6.42211	1.73406	1.92358	0.635942	1.22329	2.33478	0.524814	0.999616
24336	ptr-mir-320a	mir-320a	32.6287	1.91066	37.4428	2.49846	0.783876	1.74503	0	156.7	29.2136	1.72604	0.635905	1.09759	2.13998	0.524838	0.999616
9844	gga-miR-1605-3p	miR-1605-3p	0	7.64264	0	4.99692	2.35163	6.39845	8.66375	7.70654	4.71999	1.48545	0.635705	0.944305	1.92426	0.524969	0.999616
23615	ppt-MIR1061-5p	MIR1061-5p	4.21016	4.77665	1.62795	0	3.1355	0.581677	1.08297	0	1.92686	1.75028	-0.635382	-1.1121	0.462622	0.52518	0.999616
2582	rno-miR-539-5p	miR-539-5p	1.05254	0	56.9781	39.9754	72.9004	61.0761	68.227	0	37.5262	1.65298	0.635259	1.05007	2.07063	0.525259	0.999616
37442	piR-hsa-4836	piR-hsa-4836	2.10508	5.73198	1.62795	0	1.56775	0.581677	2.16594	0	1.72255	1.78006	-0.635216	-1.13072	0.456688	0.525288	0.999616
24521	rlcv-miR-rL1-28-5p	-miR-rL1-28-5p	1.05254	4.77665	3.25589	3.33128	2.35163	0	0	3.85327	2.32766	1.66722	-0.63496	-1.05862	0.480092	0.525455	0.999616
15476	csi-MIR390	MIR390	0	1.91066	1.62795	0	0.783876	2.90839	4.33187	0	1.44534	1.97005	0.634914	1.25081	2.37976	0.525485	0.999616
32201	piR-hsa-11543	piR-hsa-11543	1.05254	4.77665	0	2.49846	0	0.581677	2.16594	1.28442	1.54496	1.8142	-0.634265	-1.15068	0.450412	0.525908	0.999616
17925	ghr-MIR827b	MIR827b	0	0.95533	1.62795	0.83282	0	0.581677	1.08297	6.42211	1.43786	1.9372	0.634202	1.22858	2.34336	0.525949	0.999616
22008	nve-miR-9430-5p	miR-9430-5p	0	4.77665	0	0.83282	1.56775	2.32671	3.2489	5.13769	2.23632	1.66372	0.634133	1.05502	2.07775	0.525994	0.999616
40766	14q(II-1)	II-1)	7.36778	5.73198	1.62795	6.66256	8.62263	13.3786	7.58078	6.42211	7.1743	1.16598	0.633801	0.739002	1.66902	0.526211	0.999616
32892	piR-hsa-13933	piR-hsa-13933	1.05254	3.82132	3.25589	4.99692	2.35163	1.16335	3.2489	0	2.48632	1.50315	-0.633424	-0.952129	0.516869	0.526457	0.999616
7286	oan-mir-1382	mir-1382	1.05254	0	0	2.49846	0.783876	0.581677	1.08297	6.42211	1.5527	1.86981	0.633149	1.18387	2.27185	0.526636	0.999616
28939	eca-mir-153-2	mir-153-2	14.7356	26.7492	34.1869	9.99384	13.3259	13.3786	12.9956	14.1286	17.4368	1.04883	-0.632853	-0.663758	0.631232	0.52683	0.999616
31105	piR-hsa-11258	piR-hsa-11258	21.0508	40.1238	14.6515	31.6472	51.7358	33.1556	25.9912	57.799	34.5194	1.01892	0.632791	0.644762	1.56348	0.52687	0.999616
2260	mmu-mir-429	mir-429	5.2627	7.64264	3.25589	4.1641	3.91938	4.07174	2.16594	1.28442	3.97085	1.2736	-0.632735	-0.80585	0.572025	0.526907	0.999616
2144	mmu-miR-878-5p	miR-878-5p	15.7881	64.9624	11.3956	37.4769	43.897	121.571	34.655	14.1286	42.9843	1.1452	0.632658	0.72452	1.65235	0.526957	0.999616
4978	efu-miR-9328-3p	miR-9328-3p	3.15762	15.2853	3.25589	23.319	14.1098	15.1236	19.4934	26.9729	15.0897	1.15318	0.632612	0.729515	1.65808	0.526987	0.999616
27236	eca-miR-769a-5p	miR-769a-5p	2.10508	1.91066	0	0	0.783876	1.16335	2.16594	5.13769	1.65832	1.78112	0.632589	1.12671	2.18361	0.527002	0.999616
30905	piR-hsa-1100	piR-hsa-1100	25.2609	42.9898	16.2795	33.3128	32.1389	29.6655	85.5545	38.5327	37.9668	1.03049	0.632582	0.651868	1.5712	0.527006	0.999616
15127	cin-mir-4103	mir-4103	2.10508	1.91066	3.25589	1.66564	0.783876	5.81677	4.33187	5.13769	3.12594	1.37504	0.632477	0.869682	1.82726	0.527075	0.999616
6722	mml-miR-7193-5p	miR-7193-5p	2.10508	0	0	1.66564	3.1355	1.74503	1.08297	2.56885	1.53788	1.76557	0.632064	1.11595	2.16738	0.527345	0.999616
9738	eca-mir-9079	mir-9079	11.5779	11.464	26.0471	11.6595	51.7358	13.9603	28.1572	5.13769	19.9674	1.13407	0.631994	0.716725	1.64345	0.527391	0.999616
24334	ptr-mir-3192	mir-3192	0	2.86599	0	0	0	0	2.16594	6.42211	1.43175	2.33117	0.631662	1.47251	2.77505	0.527608	0.999616
8511	ssc-miR-424-5p	miR-424-5p	0	98.399	61.862	0	0	144.838	107.214	106.607	64.8649	1.84198	0.631513	1.16323	2.23959	0.527705	0.999616
18430	gra-MIR8718-5p	MIR8718-5p	4.21016	0.95533	1.62795	0.83282	0	0	1.08297	2.56885	1.40976	1.8946	-0.631269	-1.196	0.436482	0.527864	0.999616
18240	gma-MIR5780a	MIR5780a	1.05254	2.86599	3.25589	0	3.1355	2.32671	5.41484	2.56885	2.57754	1.50899	0.631215	0.952495	1.93522	0.5279	0.999616
298	bta-miR-130a-5p	miR-130a-5p	6.31524	1.91066	13.0236	5.82974	5.48713	4.07174	3.2489	2.56885	5.30698	1.23528	-0.631177	-0.779678	0.582497	0.527925	0.999616
2133	mmu-miR-8112-3p	miR-8112-3p	91.5709	68.7837	161.167	65.7928	62.71	44.7892	72.5589	71.9277	79.9125	0.981451	-0.631009	-0.619304	0.650985	0.528035	0.999616
30987	piR-hsa-26754	piR-hsa-26754	29.4711	142.344	6.51179	104.103	94.8489	73.2913	7.58078	323.674	97.7281	1.2991	0.630402	0.818956	1.76413	0.528432	0.999616
19599	hsa-miR-8075-5p	miR-8075-5p	0	284.688	21.1633	180.722	210.863	144.256	27.0742	553.586	177.794	1.49461	0.630382	0.942177	1.92143	0.528444	0.999616
35216	piR-hsa-23988	piR-hsa-23988	0	1.91066	1.62795	6.66256	4.70325	0	7.58078	8.99096	3.93452	1.60569	0.630213	1.01193	2.0166	0.528555	0.999616
33625	piR-hsa-16828	piR-hsa-16828	1.05254	1.91066	1.62795	3.33128	0.783876	1.74503	1.08297	0	1.44179	1.7046	-0.629679	-1.07335	0.475213	0.528905	0.999616
14666	cfa-miR-8822-5p	miR-8822-5p	5.2627	2.86599	1.62795	4.1641	3.1355	4.65342	12.9956	3.85327	4.81982	1.26426	0.6296	0.795975	1.73625	0.528956	0.999616
17500	gga-miR-6686-5p	miR-6686-5p	2.10508	2.86599	1.62795	0.83282	0	1.16335	1.08297	1.28442	1.37032	1.74667	-0.629576	-1.09966	0.466626	0.528972	0.999616
16350	dvi-mir-79	mir-79	5.2627	8.59797	4.88384	9.16102	3.1355	5.81677	1.08297	6.42211	5.54536	1.22173	-0.629383	-0.768938	0.586849	0.529098	0.999616
13541	bmo-mir-3414	mir-3414	3.15762	6.68731	3.25589	0	4.70325	0	1.08297	0	2.36088	1.82885	-0.629168	-1.15066	0.450421	0.529239	0.999616
23498	ppe-MIR396b	MIR396b	1.05254	0	6.51179	0.83282	0	1.16335	2.16594	0	1.4658	1.9937	-0.628954	-1.25395	0.419299	0.529379	0.999616
36781	piR-hsa-30956	piR-hsa-30956	5.2627	1.91066	3.25589	4.99692	2.35163	3.49006	2.16594	0	2.92922	1.43098	-0.628401	-0.899229	0.536173	0.529741	0.999616
73	aca-miR-140-3p	miR-140-3p	0	22.9279	26.0471	56.6318	54.0874	34.9006	45.4847	50.0925	36.2715	1.27763	0.628386	0.802844	1.74454	0.529751	0.999616
7427	osa-MIR1426	MIR1426	1.05254	4.77665	1.62795	0	0	1.74503	0	1.28442	1.31082	2.02045	-0.628108	-1.26906	0.41493	0.529933	0.999616
19878	hsa-mir-5695	mir-5695	2.10508	0.95533	3.25589	7.49538	7.05488	6.39845	4.33187	6.42211	4.75238	1.27073	0.627822	0.797794	1.73844	0.530121	0.999616
17166	fru-miR-202-5p	miR-202-5p	1.05254	2.86599	0	4.99692	2.35163	0.581677	0	1.28442	1.64165	1.77884	-0.627703	-1.11658	0.461185	0.530198	0.999616
11753	aly-MIR169a-3p	MIR169a-3p	39.9965	0	16.2795	3.33128	0	1.16335	25.9912	0	10.8452	1.8172	-0.627621	-1.14051	0.453598	0.530252	0.999616
39478	piR-hsa-20551	piR-hsa-20551	3.15762	1.91066	4.88384	4.1641	6.271	1.16335	10.8297	6.42211	4.8503	1.27917	0.627529	0.802716	1.74438	0.530312	0.999616
4125	cfa-mir-8808	mir-8808	6.31524	27.7046	0	19.9877	24.3001	16.287	2.16594	56.5146	19.1594	1.37673	0.627243	0.863543	1.8195	0.5305	0.999616
31068	piR-hsa-8030	piR-hsa-8030	0	26.7492	16.2795	84.1149	0	0	29.2401	29.5417	23.2407	1.79121	-0.627139	-1.12334	0.459031	0.530568	0.999616
22065	nvi-mir-13b	mir-13b	3.15762	1.91066	1.62795	0.83282	0.783876	0.581677	2.16594	0	1.38257	1.74576	-0.626886	-1.09439	0.468333	0.530734	0.999616
8365	sja-miR-3497-3p	miR-3497-3p	1.05254	0.95533	4.88384	1.66564	0.783876	1.74503	0	1.28442	1.54633	1.71118	-0.626857	-1.07267	0.475439	0.530753	0.999616
18874	hru-mir-1986	mir-1986	0	3.82132	0	0.83282	1.56775	0.581677	2.16594	6.42211	1.92395	1.76329	0.626582	1.10484	2.15076	0.530933	0.999616
37968	piR-hsa-7116	piR-hsa-7116	10.5254	12.4193	6.51179	13.3251	5.48713	16.8686	11.9127	35.9638	14.1267	1.11668	0.626528	0.699634	1.62409	0.530968	0.999616
25690	tae-MIR1125-5p	MIR1125-5p	2.10508	1.91066	0	0.83282	2.35163	1.74503	2.16594	3.85327	1.87055	1.58172	0.626334	0.990685	1.98713	0.531096	0.999616
11787	aly-MIR396b	MIR396b	1.05254	5.73198	9.76768	1.66564	1.56775	1.16335	2.16594	5.13769	3.53157	1.39317	-0.625825	-0.871881	0.546434	0.53143	0.999616
18205	gma-MIR5378	MIR5378	4.21016	3.82132	0	0	0	1.16335	1.08297	1.28442	1.44528	1.96244	-0.625715	-1.22793	0.42693	0.531502	0.999616
6648	mdo-mir-7311	mir-7311	25.2609	23.8832	86.2812	24.1518	14.1098	10.4702	27.0742	47.5236	32.3444	1.09895	-0.625616	-0.687521	0.62092	0.531567	0.999616
31	aca-let-7c-1-3p	let-7c-1-3p	1.05254	0	3.25589	0.83282	3.1355	1.74503	1.08297	3.85327	1.86975	1.6419	0.625523	1.02704	2.03785	0.531628	0.999616
924	efu-mir-103a	mir-103a	17.8932	13.3746	16.2795	9.99384	7.83876	11.0519	10.8297	6.42211	11.7104	1.06024	-0.625014	-0.662663	0.631711	0.531962	0.999616
40036	piR-hsa-28812	piR-hsa-28812	8.42032	28.6599	16.2795	21.6533	18.813	24.4304	45.4847	29.5417	24.1604	1.04381	0.624294	0.651644	1.57096	0.532434	0.999616
13452	bmo-mir-2824	mir-2824	2.10508	5.73198	4.88384	1.66564	1.56775	1.74503	3.2489	1.28442	2.77908	1.38628	-0.624245	-0.865378	0.548903	0.532467	0.999616
23477	ppe-MIR172c	MIR172c	2.10508	2.86599	0	0	0	1.16335	6.49781	3.85327	2.06069	1.84475	0.623419	1.15005	2.21922	0.533009	0.999616
93	aca-miR-18a-5p	miR-18a-5p	1086.22	877.948	1167.24	983.561	1051.96	0	0	870.839	754.721	1.76111	-0.623312	-1.09772	0.467254	0.533079	0.999616
4197	cgr-miR-450b-5p	miR-450b-5p	0	3781.19	3218.45	0	3647.37	4438.2	3300.89	4075.47	2807.7	1.83476	0.623198	1.14342	2.20903	0.533155	0.999616
424	bta-miR-378c-5p	miR-378c-5p	0	0	56.9781	90.7774	0	0	56.3143	0	25.5087	2.23879	-0.622942	-1.39464	0.38034	0.533322	0.999616
21298	mmu-mir-196a-1	mir-196a-1	2.10508	0	0	1.66564	0	2.32671	5.41484	1.28442	1.59959	1.91706	0.62283	1.194	2.28786	0.533396	0.999616
2552	rno-miR-294-3p	miR-294-3p	7.36778	1.91066	6.51179	1.66564	3.91938	2.90839	2.16594	0	3.3062	1.43642	-0.622823	-0.894635	0.537883	0.533401	0.999616
12978	bfl-mir-34a	mir-34a	2.10508	3.82132	1.62795	2.49846	0.783876	1.16335	2.16594	1.28442	1.9313	1.50308	-0.622749	-0.936038	0.522666	0.53345	0.999616
9204	bmo-mir-3314	mir-3314	4.21016	2.86599	3.25589	0	0	2.32671	2.16594	0	1.85309	1.83879	-0.622718	-1.14505	0.452174	0.53347	0.999616
14318	cca-MIR395c	MIR395c	53.6795	38.2132	16.2795	36.6441	25.8679	20.9404	22.7423	24.404	29.8464	1.0097	-0.621923	-0.627954	0.647094	0.533993	0.999616
16643	eca-miR-9154-5p	miR-9154-5p	4.21016	11.464	0	7.49538	10.1904	7.5618	5.41484	17.9819	8.03981	1.27944	0.621708	0.795436	1.7356	0.534134	0.999616
24819	sbi-MIR5383	MIR5383	0	2.86599	0	0.83282	0	4.07174	2.16594	2.56885	1.56317	1.91826	0.621148	1.19152	2.28394	0.534502	0.999616
34531	piR-hsa-20907	piR-hsa-20907	0	3.82132	1.62795	2.49846	1.56775	4.07174	3.2489	6.42211	2.90728	1.46938	0.621096	0.912626	1.88247	0.534536	0.999616
10791	osa-MIR2118i-3p	MIR2118i-3p	3.15762	3.82132	1.62795	3.33128	3.91938	2.90839	11.9127	2.56885	4.15593	1.29792	0.620931	0.805921	1.74826	0.534645	0.999616
4198	cgr-miR-496-5p	miR-496-5p	19.9983	12.4193	19.5354	6.66256	10.9743	10.4702	9.74671	5.13769	11.868	1.08787	-0.620807	-0.675359	0.626177	0.534726	0.999616
74	aca-miR-142-3p	miR-142-3p	1524.08	1219	826.997	0	1316.91	0	0	0	610.873	2.31754	-0.620774	-1.43867	0.368907	0.534748	0.999616
31097	piR-hsa-10350	piR-hsa-10350	3.15762	1.91066	4.88384	0	1.56775	1.74503	1.08297	0	1.79348	1.73024	-0.620741	-1.07403	0.47499	0.53477	0.999616
2597	rno-mir-23b	mir-23b	2.10508	4.77665	11.3956	8.3282	5.48713	4.07174	3.2489	2.56885	5.24777	1.22993	-0.620636	-0.76334	0.589131	0.534839	0.999616
12839	bdi-MIR7755	MIR7755	3.15762	17.1959	4.88384	7.49538	3.1355	2.90839	9.74671	3.85327	6.54708	1.22528	-0.620571	-0.760374	0.590343	0.534882	0.999616
29768	eca-mir-544-2	mir-544-2	1.05254	0	4.88384	1.66564	0	1.74503	0	1.28442	1.32893	2.0037	-0.619799	-1.24189	0.422818	0.53539	0.999616
14053	bta-mir-2899	mir-2899	0	2.86599	0	0	0.783876	0	7.58078	0	1.40383	2.35717	0.619797	1.46096	2.75292	0.535392	0.999616
27287	efu-mir-204	mir-204	2.10508	0	6.51179	0.83282	0.783876	0	3.2489	0	1.68531	1.9556	-0.619708	-1.2119	0.431699	0.53545	0.999616
23670	ppt-MIR166c-5p	MIR166c-5p	0	1.91066	1.62795	1.66564	0.783876	0	0	11.5598	2.19349	1.93836	0.619679	1.20116	2.29925	0.535469	0.999616
13951	bta-mir-15b	mir-15b	0	2.86599	0	0.83282	2.35163	0	5.41484	1.28442	1.59371	1.94984	0.618673	1.20631	2.30747	0.536132	0.999616
7736	pmi-mir-10	mir-10	2.10508	3.82132	9.76768	1.66564	4.70325	2.90839	1.08297	0	3.25679	1.4719	-0.618469	-0.910327	0.532065	0.536266	0.999616
28	aca-let-7a-5p	let-7a-5p	562.056	32091.4	686.993	0	39740.9	718.371	0	42809.8	14576.2	2.13588	0.618257	1.32052	2.49757	0.536406	0.999616
33322	piR-hsa-15647	piR-hsa-15647	2.10508	1.91066	1.62795	1.66564	0	0	1.08297	2.56885	1.37014	1.85962	-0.618173	-1.14957	0.450759	0.536461	0.999616
30351	hsa-mir-146b	mir-146b	1.05254	4.77665	3.25589	0	3.1355	2.32671	7.58078	3.85327	3.24767	1.46936	0.61796	0.908004	1.87645	0.536602	0.999616
35125	piR-hsa-23532	piR-hsa-23532	14.7356	85.9797	17.9074	59.1302	54.8713	45.3708	12.9956	182.388	59.1723	1.18076	0.617223	0.728792	1.65725	0.537088	0.999616
3440	bdi-MIR171d	MIR171d	2.10508	0.95533	1.62795	1.66564	1.56775	0.581677	10.8297	0	2.41664	1.64601	0.616988	1.01557	2.0217	0.537243	0.999616
670	cgr-miR-199b-3p	miR-199b-3p	0	1.91066	1.62795	0	2.35163	1.16335	4.33187	0	1.42318	1.9591	0.616878	1.20853	2.31101	0.537315	0.999616
5079	efu-mir-9259	mir-9259	0	4.77665	1.62795	0	2.35163	1.16335	1.08297	8.99096	2.49919	1.71491	0.616602	1.05741	2.0812	0.537498	0.999616
23265	ppc-miR-63g-5p	miR-63g-5p	5.2627	3.82132	3.25589	0.83282	1.56775	2.90839	2.16594	0	2.47685	1.5083	-0.616469	-0.929819	0.524924	0.537585	0.999616
38397	piR-hsa-9205	piR-hsa-9205	0	0.95533	0	2.49846	1.56775	1.74503	2.16594	2.56885	1.43767	1.78927	0.616181	1.10252	2.14729	0.537775	0.999616
35904	piR-hsa-27022	piR-hsa-27022	1.05254	0.95533	1.62795	2.49846	2.35163	2.32671	4.33187	2.56885	2.21417	1.45893	0.616025	0.898735	1.86443	0.537878	0.999616
878	eca-miR-451	miR-451	5.2627	1.91066	1.62795	5.82974	6.271	6.98013	5.41484	6.42211	4.96489	1.22774	0.615682	0.7559	1.68868	0.538104	0.999616
11646	aga-miR-124-5p	miR-124-5p	2.10508	4.77665	3.25589	0	0.783876	1.74503	2.16594	0	1.85406	1.72504	-0.615649	-1.06202	0.478961	0.538126	0.999616
24912	sja-miR-3506-3p	miR-3506-3p	1.05254	3.82132	0	1.66564	2.35163	2.32671	3.2489	5.13769	2.45055	1.49587	0.615576	0.920822	1.89319	0.538175	0.999616
21345	mmu-mir-486b	mir-486b	0	2.86599	0	0	0	4.65342	3.2489	0	1.34604	2.30538	0.615397	1.41872	2.67349	0.538292	0.999616
26260	vvi-MIR828a-3p	MIR828a-3p	8.42032	3.82132	4.88384	1.66564	5.48713	4.07174	12.9956	8.99096	6.29207	1.21059	0.615266	0.744836	1.67578	0.538379	0.999616
33828	piR-hsa-1768	piR-hsa-1768	2.10508	5.73198	3.25589	2.49846	1.56775	2.32671	3.2489	0	2.59185	1.46753	-0.614911	-0.902399	0.534996	0.538614	0.999616
14464	cel-miR-37-5p	miR-37-5p	5.2627	65.9177	0	41.641	40.7615	23.2671	9.74671	133.58	40.0221	1.41554	0.614871	0.870376	1.82814	0.53864	0.999616
17857	ggo-mir-543	mir-543	0	3.82132	1.62795	3.33128	2.35163	2.32671	1.08297	11.5598	3.26271	1.51014	0.614781	0.928408	1.90317	0.538699	0.999616
30528	hsa-miR-493-5p	miR-493-5p	1.05254	2.86599	1.62795	3.33128	0	1.74503	0	2.56885	1.64895	1.75794	-0.614468	-1.0802	0.472964	0.538906	0.999616
20314	lus-MIR160b-3p	MIR160b-3p	1.05254	1.91066	0	3.33128	0.783876	1.16335	8.66375	2.56885	2.43429	1.58528	0.61435	0.973917	1.96417	0.538984	0.999616
7110	mtr-MIR2678	MIR2678	0	0.95533	6.51179	0.83282	0.783876	0.581677	2.16594	0	1.47893	1.88582	-0.614207	-1.15829	0.448044	0.539079	0.999616
16088	dps-mir-92c	mir-92c	1.05254	4.77665	1.62795	1.66564	0	0	3.2489	1.28442	1.70701	1.80509	-0.614193	-1.10867	0.46372	0.539088	0.999616
29463	bfl-miR-4057-2-3p	miR-4057-2-3p	17.8932	50.6325	4.88384	56.6318	39.1938	33.7373	10.8297	134.864	43.5833	1.20696	0.614164	0.741272	1.67165	0.539107	0.999616
28721	pma-let-7a-4-5p	let-7a-4-5p	4.21016	32.4812	8.13973	18.322	0.783876	4.65342	28.1572	2.56885	12.4146	1.3343	-0.613595	-0.818719	0.566945	0.539483	0.999616
19186	hsa-miR-4533-5p	miR-4533-5p	2.10508	0.95533	0	0.83282	0	0.581677	2.16594	6.42211	1.63287	1.84674	0.612981	1.13202	2.19165	0.539889	0.999616
25833	tca-miR-3895-5p	miR-3895-5p	10.5254	28.6599	11.3956	9.99384	7.83876	8.72516	15.1616	6.42211	12.3403	1.09535	-0.612906	-0.671349	0.627919	0.539939	0.999616
28186	ppe-MIR8132-3p	MIR8132-3p	2.10508	3.82132	3.25589	5.82974	6.271	5.81677	2.16594	11.5598	5.10319	1.24285	0.61262	0.761394	1.69513	0.540128	0.999616
30907	piR-hsa-11249	piR-hsa-11249	1.05254	1.91066	1.62795	0.83282	0.783876	1.74503	5.41484	2.56885	1.99207	1.5426	0.612616	0.945023	1.92522	0.54013	0.999616
19241	hsa-miR-4726-5p	miR-4726-5p	1.05254	1.91066	0	4.99692	0	1.16335	0	2.56885	1.46154	1.93871	-0.612612	-1.18767	0.43901	0.540133	0.999616
20899	mml-miR-563-3p	miR-563-3p	0	0	3.25589	2.49846	1.56775	0	9.74671	1.28442	2.29416	1.88202	0.612587	1.1529	2.22361	0.540149	0.999616
19161	hsa-miR-4494-3p	miR-4494-3p	0	4.77665	0	0	0.783876	1.74503	2.16594	6.42211	1.9867	1.8669	0.612556	1.14358	2.20929	0.54017	0.999616
32349	piR-hsa-12141	piR-hsa-12141	3.15762	0.95533	0	1.66564	3.91938	1.74503	3.2489	2.56885	2.15759	1.53196	0.611513	0.936813	1.91429	0.54086	0.999616
40863	ACA37	7	2.10508	3.82132	4.88384	2.49846	3.91938	1.74503	1.08297	0	2.50701	1.49077	-0.610954	-0.910791	0.531893	0.54123	0.999616
30061	oha-let-7a-2-5p	let-7a-2-5p	0	2.86599	1.62795	0	0.783876	0.581677	3.2489	5.13769	1.78076	1.807	0.610814	1.10374	2.14911	0.541323	0.999616
20989	mml-mir-210	mir-210	0	0.95533	3.25589	0.83282	2.35163	1.16335	1.08297	5.13769	1.84746	1.66412	0.610058	1.01521	2.02119	0.541823	0.999616
22762	osa-MIR5150-5p	MIR5150-5p	8.42032	4.77665	22.7912	11.6595	8.62263	6.98013	3.2489	10.2754	9.59684	1.1446	-0.609466	-0.697596	0.616599	0.542216	0.999616
1493	mmu-miR-345-3p	miR-345-3p	327.34	0	0	0	0	449.055	0	464.961	155.169	2.43313	0.608783	1.48125	2.7919	0.542668	0.999616
35787	piR-hsa-26526	piR-hsa-26526	1.05254	1.91066	3.25589	8.3282	3.91938	2.90839	8.66375	10.2754	5.03927	1.29603	0.608085	0.788098	1.7268	0.543131	0.999616
18466	gra-MIR8767b	MIR8767b	15.7881	21.0173	26.0471	17.4892	8.62263	13.3786	18.4105	11.5598	16.5391	1.03082	-0.608015	-0.626752	0.647633	0.543178	0.999616
1600	mmu-miR-483-3p	miR-483-3p	588.37	455.692	882.347	279.828	327.66	267.572	490.585	377.62	458.709	0.977319	-0.605813	-0.592073	0.663389	0.544639	0.999616
40871	ACA64	4	1.05254	3.82132	3.25589	4.1641	1.56775	1.74503	2.16594	1.28442	2.38212	1.42483	-0.605718	-0.863045	0.549791	0.544702	0.999616
1696	mmu-miR-6240-3p	miR-6240-3p	77.8879	384.043	84.6532	178.224	206.943	166.941	98.5501	687.166	235.551	1.11744	0.605568	0.676686	1.59846	0.544801	0.999616
14258	cbr-mir-124a	mir-124a	3.15762	5.73198	1.62795	0	0.783876	1.16335	2.16594	1.28442	1.98939	1.63033	-0.605194	-0.986666	0.504643	0.54505	0.999616
30058	oan-mir-7407-2	mir-7407-2	2.10508	0.95533	4.88384	0	0	0	3.2489	0	1.39914	2.15745	-0.604969	-1.30519	0.404668	0.5452	0.999616
23567	ppe-MIR828	MIR828	0	2.86599	0	0	1.56775	0	6.49781	0	1.36644	2.33388	0.604767	1.41145	2.66005	0.545334	0.999616
1227	mmu-miR-101b-5p	miR-101b-5p	5.2627	4.77665	6.51179	4.1641	3.91938	3.49006	2.16594	2.56885	4.10743	1.23395	-0.604542	-0.745975	0.596265	0.545483	0.999616
14656	cfa-miR-8802-5p	miR-8802-5p	2.10508	5.73198	3.25589	0.83282	0	0.581677	3.2489	2.56885	2.29065	1.5964	-0.602239	-0.961414	0.513553	0.547015	0.999616
17856	ggo-mir-525	mir-525	2.10508	2.86599	0	4.1641	3.1355	0	1.08297	0	1.66921	1.8753	-0.601906	-1.12876	0.45731	0.547236	0.999616
22590	osa-MIR1846d-5p	MIR1846d-5p	1.05254	0	6.51179	1.66564	0.783876	1.16335	2.16594	0	1.66789	1.79963	-0.601677	-1.0828	0.472113	0.547389	0.999616
29099	mml-miR-199a-2-3p	miR-199a-2-3p	9.47286	5.73198	0	7.49538	5.48713	4.65342	1.08297	1.28442	4.40102	1.40869	-0.601509	-0.847341	0.555808	0.547501	0.999616
4477	dme-miR-4918-3p	miR-4918-3p	11.5779	6.68731	8.13973	4.99692	3.1355	1.16335	9.74671	5.13769	6.32314	1.22055	-0.601389	-0.734025	0.601224	0.547581	0.999616
1938	mmu-miR-7021-5p	miR-7021-5p	11.5779	12.4193	8.13973	12.4923	3.91938	13.3786	6.49781	3.85327	9.03479	1.12757	-0.601137	-0.677826	0.625106	0.547748	0.999616
24747	rrv-miR-rR1-1	miR-rR1-1	4.21016	3.82132	8.13973	2.49846	3.1355	0.581677	3.2489	3.85327	3.68613	1.32587	-0.600584	-0.796293	0.575827	0.548117	0.999616
31027	piR-hsa-28527	piR-hsa-28527	217.876	289.465	107.444	173.227	152.856	216.384	458.096	367.345	247.836	0.99814	0.600504	0.599386	1.51507	0.548171	0.999616
19282	hsa-miR-4793-5p	miR-4793-5p	1.05254	2.86599	1.62795	1.66564	0.783876	0.581677	1.08297	1.28442	1.36813	1.6688	-0.599981	-1.00125	0.499568	0.548519	0.999616
24701	rno-mir-3547	mir-3547	0	2.86599	8.13973	0	0.783876	3.49006	0	0	1.90996	2.04023	-0.599887	-1.22391	0.428121	0.548581	0.999616
14805	cgr-miR-34b-5p	miR-34b-5p	2.10508	0.95533	1.62795	2.49846	0	0	1.08297	2.56885	1.35483	1.87716	-0.599749	-1.12582	0.458241	0.548674	0.999616
13482	bmo-mir-3223	mir-3223	3.15762	2.86599	1.62795	0	3.91938	2.90839	2.16594	5.13769	2.72287	1.4792	0.59942	0.886662	1.84889	0.548893	0.999616
1457	mmu-miR-3101-5p	miR-3101-5p	0	0	1.62795	1.66564	1.56775	0	2.16594	3.85327	1.36007	2.00235	0.5992	1.19981	2.29709	0.54904	0.999616
33924	piR-hsa-18098	piR-hsa-18098	0	2.86599	0	0.83282	2.35163	1.16335	2.16594	2.56885	1.49357	1.78353	0.599154	1.06861	2.09741	0.54907	0.999616
11994	ame-miR-9877-3p	miR-9877-3p	1.05254	3.82132	1.62795	2.49846	1.56775	0.581677	0	2.56885	1.71482	1.6526	-0.599117	-0.990101	0.503442	0.549095	0.999616
16802	efu-miR-379-5p	miR-379-5p	31.5762	0	0	0	43.1132	0	0	34.6794	13.6711	2.16535	0.599014	1.29708	2.45731	0.549164	0.999616
39881	piR-hsa-26252	piR-hsa-26252	1.05254	0.95533	1.62795	0	3.1355	2.90839	0	1.28442	1.37052	1.86959	0.59893	1.11975	2.1731	0.54922	0.999616
14944	chi-mir-493	mir-493	8.42032	8.59797	11.3956	14.9908	13.3259	12.2152	15.1616	26.9729	13.885	1.05726	0.598797	0.633087	1.55088	0.549309	0.999616
22875	osa-MIR6251-3p	MIR6251-3p	1.05254	0.95533	4.88384	0.83282	0.783876	0.581677	2.16594	0	1.407	1.77876	-0.598534	-1.06465	0.47809	0.549484	0.999616
2730	xtr-miR-215-5p	miR-215-5p	1.05254	2.86599	0	1.66564	2.35163	4.07174	0	5.13769	2.14315	1.6601	0.598479	0.993535	1.99106	0.54952	0.999616
2411	oar-mir-127	mir-127	26.3135	16.2406	11.3956	10.8267	12.542	10.4702	9.74671	8.99096	13.3158	1.05745	-0.598422	-0.632804	0.644922	0.549558	0.999616
26858	ccr-miR-22a-5p	miR-22a-5p	2.10508	4.77665	0	0.83282	3.1355	0	0	0	1.35626	2.1278	-0.598377	-1.27322	0.413734	0.549588	0.999616
2375	mmu-mir-93	mir-93	22.1033	30.5705	32.5589	13.3251	17.2453	14.5419	25.9912	5.13769	20.1843	1.07224	-0.598316	-0.641536	0.64103	0.549629	0.999616
970	gga-miR-15b-3p	miR-15b-3p	2.10508	1.91066	0	3.33128	0	0	1.08297	2.56885	1.37485	1.96809	-0.598235	-1.17738	0.442153	0.549683	0.999616
30253	ssc-mir-105-2	mir-105-2	2.10508	4.77665	0	1.66564	0.783876	0	1.08297	2.56885	1.62288	1.79298	-0.598203	-1.07257	0.475472	0.549705	0.999616
8750	vvi-MIR164b-3p	MIR164b-3p	3.15762	16.2406	1.62795	10.8267	11.7581	14.5419	10.8297	15.4131	10.5495	1.17292	0.598022	0.70143	1.62612	0.549826	0.999616
9314	bta-mir-378b	mir-378b	5.2627	4.77665	6.51179	5.82974	2.35163	2.90839	0	7.70654	4.41843	1.35325	-0.597436	-0.808478	0.570984	0.550216	0.999616
38705	piR-hsa-11558	piR-hsa-11558	16.8406	15.2853	3.25589	4.99692	9.40651	8.72516	37.9039	10.2754	13.3362	1.17614	0.597299	0.702504	1.62733	0.550308	0.999616
2634	sko-miR-92a-3p	miR-92a-3p	34.7338	36.3025	9.76768	9.16102	33.7066	39.5541	29.2401	37.2483	28.7143	1.05848	0.597257	0.632182	1.54991	0.550336	0.999616
22893	osa-MIR812p-5p	MIR812p-5p	1.05254	3.82132	0	3.33128	0	0	0	3.85327	1.5073	2.09759	-0.59715	-1.25258	0.419698	0.550407	0.999616
555	ccr-miR-193a-3p	miR-193a-3p	0	844.511	1.62795	2752.47	2201.91	3341.15	771.073	973.592	1360.79	1.70453	0.597102	1.01778	2.0248	0.550439	0.999616
13150	bmo-miR-2734-5p	miR-2734-5p	16.8406	3.82132	4.88384	2.49846	4.70325	4.65342	2.16594	5.13769	5.58807	1.25172	-0.597037	-0.747321	0.595709	0.550483	0.999616
26195	vvi-MIR169i	MIR169i	2.10508	0.95533	0	4.1641	0	1.16335	1.08297	1.28442	1.34441	1.85252	-0.596941	-1.10584	0.464631	0.550547	0.999616
14500	cel-miR-786-5p	miR-786-5p	5.2627	4.77665	3.25589	4.1641	1.56775	1.74503	6.49781	0	3.40874	1.41381	-0.59651	-0.843353	0.557347	0.550834	0.999616
29609	cfa-miR-8834a-2-3p	miR-8834a-2-3p	4.21016	1.91066	0	1.66564	0.783876	0.581677	0	2.56885	1.46511	1.8136	-0.595121	-1.07931	0.473255	0.551762	0.999616
27253	eca-mir-196b	mir-196b	0	2.86599	3.25589	2.49846	0.783876	1.16335	1.08297	1.28442	1.61687	1.66992	-0.594927	-0.993483	0.502264	0.551892	0.999616
40802	U15A		4.21016	4.77665	4.88384	7.49538	2.35163	4.65342	4.33187	1.28442	4.24842	1.25332	-0.594552	-0.745164	0.5966	0.552143	0.999616
1305	mmu-miR-1943-3p	miR-1943-3p	2.10508	3.82132	0	1.66564	7.05488	1.74503	4.33187	1.28442	2.75103	1.48881	0.594529	0.885139	1.84694	0.552158	0.999616
21614	mtr-MIR2592p	MIR2592p	2.10508	5.73198	3.25589	0	0	0	0	5.13769	2.02883	2.0292	-0.594204	-1.20576	0.433541	0.552375	0.999616
1289	mmu-miR-1929-5p	miR-1929-5p	1.05254	2.86599	4.88384	1.66564	3.91938	2.90839	3.2489	7.70654	3.5314	1.32736	0.593869	0.788276	1.72701	0.5526	0.999616
26415	zma-MIR396b	MIR396b	0	2.86599	8.13973	7.49538	0	0.581677	6.49781	2.56885	3.51868	1.63478	-0.593771	-0.970685	0.510264	0.552665	0.999616
19921	hsa-mir-657	mir-657	7.36778	0	0	0.83282	0	0	1.08297	2.56885	1.48155	2.16569	-0.593479	-1.28529	0.410289	0.552861	0.999616
13923	bta-miR-763-5p	miR-763-5p	11.5779	33.4365	9.76768	41.641	35.2744	24.4304	24.9083	66.79	30.9783	1.08007	0.593371	0.640881	1.55928	0.552933	0.999616
27599	hsa-miR-6512-3p	miR-6512-3p	6.31524	1.91066	4.88384	0	3.91938	1.16335	0	1.28442	2.43461	1.67328	-0.593165	-0.992528	0.502596	0.553071	0.999616
11083	pxy-miR-8516-5p	miR-8516-5p	0	2.86599	0	1.66564	0.783876	1.16335	5.41484	2.56885	1.80782	1.74169	0.592706	1.03231	2.0453	0.553378	0.999616
6231	hsa-mir-219a-1	mir-219a-1	91.5709	0	0	0	66.6294	0	0	168.259	40.8075	2.29037	0.592577	1.35722	2.56191	0.553464	0.999616
13598	bna-MIR6036-3p	MIR6036-3p	1.05254	2.86599	0	0.83282	2.35163	0	5.41484	2.56885	1.88583	1.7567	0.592122	1.04018	2.05649	0.553769	0.999616
362	bta-miR-221-5p	miR-221-5p	13.683	14.3299	11.3956	19.9877	31.355	17.4503	23.8253	17.9819	18.7511	1.02244	0.591863	0.605141	1.52113	0.553943	0.999616
40389	piR-hsa-5704	piR-hsa-5704	0	0.95533	3.25589	0.83282	0.783876	1.74503	0	7.70654	1.90994	1.80293	0.591678	1.06676	2.09472	0.554066	0.999616
14032	bta-mir-2453	mir-2453	1.05254	5.73198	0	1.66564	0.783876	0.581677	5.41484	10.2754	3.18824	1.57833	0.591659	0.933834	1.91035	0.554079	0.999616
18783	hhi-mir-7792	mir-7792	4.21016	1.91066	4.88384	1.66564	0.783876	3.49006	1.08297	1.28442	2.41395	1.45483	-0.591265	-0.860192	0.550879	0.554343	0.999616
21593	mtr-MIR2592am	MIR2592am	0	0	3.25589	2.49846	6.271	0.581677	0	5.13769	2.21809	1.85145	0.591003	1.09421	2.13496	0.554518	0.999616
19287	hsa-miR-4802-3p	miR-4802-3p	0	4.77665	9.76768	0.83282	1.56775	0.581677	5.41484	0	2.86768	1.69601	-0.590984	-1.00231	0.499199	0.554531	0.999616
27808	mml-mir-500a	mir-500a	4.21016	0.95533	3.25589	0.83282	0.783876	6.98013	3.2489	5.13769	3.1756	1.42265	0.5907	0.840362	1.7905	0.554721	0.999616
1547	mmu-miR-434-5p	miR-434-5p	1.05254	15899.6	0	14659.3	17959.4	18233.3	15784.3	12076.1	11826.6	1.80765	0.590619	1.06763	2.09599	0.554776	0.999616
14075	bta-mir-4523	mir-4523	2.10508	5.73198	1.62795	1.66564	3.1355	0	0	2.56885	2.10437	1.70094	-0.590096	-1.00372	0.498714	0.555126	0.999616
2833	hsa-miR-5585-3p	miR-5585-3p	6.31524	0.95533	1.62795	1.66564	0.783876	0	1.08297	3.85327	2.03553	1.66702	-0.589801	-0.983212	0.505852	0.555324	0.999616
22585	osa-MIR171f	MIR171f	0	2.86599	6.51179	0	0.783876	0	2.16594	1.28442	1.7015	1.95434	-0.589397	-1.15188	0.450038	0.555595	0.999616
5689	gma-MIR5044	MIR5044	12.6305	16.2406	0	6.66256	12.542	11.0519	11.9127	24.404	11.9305	1.2442	0.589322	0.733232	1.66236	0.555645	0.999616
2156	mmu-miR-99a-3p	miR-99a-3p	5.2627	6.68731	6.51179	8.3282	11.7581	7.5618	7.58078	15.4131	8.63797	1.10352	0.589227	0.650226	1.56941	0.555709	0.999616
22241	oan-mir-1422h	mir-1422h	0	0	3.25589	0	0	0	0	7.70654	1.3703	2.6013	0.588994	1.53215	2.89216	0.555865	0.999616
19898	hsa-mir-6081	mir-6081	6.31524	5.73198	8.13973	13.3251	3.91938	5.2351	4.33187	7.70654	6.83812	1.14525	-0.588721	-0.674234	0.626665	0.556048	0.999616
31057	piR-hsa-619	piR-hsa-619	7.36778	16.2406	6.51179	16.6564	10.1904	10.4702	10.8297	43.6704	15.2421	1.13079	0.587996	0.664897	1.58546	0.556535	0.999616
3992	cel-miR-269-5p	miR-269-5p	0	1.91066	1.62795	0	0	1.74503	2.16594	3.85327	1.41286	1.97315	0.58792	1.16005	2.23466	0.556586	0.999616
33962	piR-hsa-18285	piR-hsa-18285	7.36778	8.59797	4.88384	4.99692	8.62263	10.4702	7.58078	14.1286	8.33109	1.10774	0.586934	0.650169	1.56935	0.557248	0.999616
2063	mmu-miR-743b-3p	miR-743b-3p	13.683	66.8731	6.51179	44.1395	40.7615	136.112	24.9083	12.8442	43.2292	1.20872	0.5867	0.709155	1.63485	0.557405	0.999616
21545	mtr-MIR166a	MIR166a	6.31524	0	0	0	0	2.32671	10.8297	1.28442	2.59451	1.99807	0.586531	1.17193	2.25312	0.557519	0.999616
22166	oan-miR-219-3p	miR-219-3p	1.05254	4.77665	11.3956	2.49846	3.1355	2.32671	4.33187	1.28442	3.85022	1.35002	-0.586058	-0.791191	0.577867	0.557836	0.999616
21597	mtr-MIR2592bb	MIR2592bb	0	4.77665	13.0236	0	0	1.74503	5.41484	1.28442	3.28056	1.80512	-0.585614	-1.0571	0.480596	0.558135	0.999616
13934	bta-miR-7864-5p	miR-7864-5p	10.5254	42.0345	13.0236	19.9877	21.9485	24.4304	17.3275	70.6432	27.4901	1.09686	0.585429	0.642132	1.56063	0.558259	0.999616
11595	aca-mir-212	mir-212	3.15762	14.3299	1.62795	5.82974	5.48713	6.98013	4.33187	25.6885	8.4291	1.25749	0.584902	0.735508	1.66498	0.558614	0.999616
20902	mml-miR-572-5p	miR-572-5p	1.05254	2.86599	4.88384	0.83282	0	2.32671	1.08297	1.28442	1.79116	1.66599	-0.584076	-0.973065	0.509423	0.559169	0.999616
1673	mmu-miR-5620-3p	miR-5620-3p	1.05254	0.95533	3.25589	3.33128	5.48713	0.581677	5.41484	3.85327	2.99149	1.43027	0.583812	0.835009	1.78387	0.559347	0.999616
16066	dps-mir-2552	mir-2552	7.36778	1.91066	0	3.33128	0	0.581677	1.08297	5.13769	2.42651	1.70009	-0.58373	-0.992395	0.502643	0.559402	0.999616
692	cgr-miR-300-5p	miR-300-5p	0	11.464	27.6751	22.4861	28.2195	23.8488	33.572	16.6975	20.4954	1.26498	0.583403	0.737995	1.66786	0.559622	0.999616
30975	piR-hsa-25046	piR-hsa-25046	68.4151	285.644	84.6532	254.01	211.646	161.706	82.3056	630.651	222.379	1.11045	0.583265	0.647684	1.56665	0.559715	0.999616
581	cfa-miR-150-5p	miR-150-5p	83.1506	0	0	41.641	321.389	0	0	0	55.7726	2.33927	0.583135	1.36411	2.57418	0.559803	0.999616
11303	tae-MIR9777	MIR9777	0	4.77665	1.62795	2.49846	3.1355	2.32671	2.16594	8.99096	3.19027	1.46809	0.583132	0.856093	1.81013	0.559804	0.999616
8112	pti-MIR5479	MIR5479	1.05254	6.68731	0	2.49846	0.783876	1.16335	1.08297	2.56885	1.97967	1.62378	-0.582818	-0.946369	0.518937	0.560016	0.999616
1757	mmu-miR-675-5p	miR-675-5p	9.47286	7.64264	21.1633	10.8267	12.542	5.81677	8.66375	3.85327	9.99766	1.11869	-0.582597	-0.651745	0.63651	0.560164	0.999616
35868	piR-hsa-26872	piR-hsa-26872	3.15762	1.91066	1.62795	0	1.56775	4.65342	2.16594	3.85327	2.36707	1.53342	0.582551	0.893294	1.85741	0.560195	0.999616
29566	cbn-miR-7616-2-3p	miR-7616-2-3p	1.05254	0	1.62795	1.66564	3.1355	1.74503	2.16594	1.28442	1.58463	1.67224	0.582367	0.973857	1.96408	0.560319	0.999616
32488	piR-hsa-12606	piR-hsa-12606	3.15762	1.91066	3.25589	0.83282	0	1.16335	1.08297	2.56885	1.74652	1.64993	-0.581967	-0.960203	0.513984	0.560589	0.999616
30917	piR-hsa-12485	piR-hsa-12485	12.6305	22.9279	8.13973	20.8205	21.9485	18.6137	46.5676	12.8442	20.5616	1.07112	0.581902	0.623288	1.54038	0.560632	0.999616
14155	cbn-mir-241-1	mir-241-1	2.10508	3.82132	0	1.66564	2.35163	0.581677	0	12.8442	2.9212	1.6857	0.581722	0.980608	1.9733	0.560754	0.999616
11143	sbi-MIR172a	MIR172a	4.21016	0.95533	6.51179	4.1641	5.48713	11.0519	6.49781	2.56885	5.18088	1.26152	0.581408	0.733457	1.66262	0.560966	0.999616
2581	rno-miR-532-5p	miR-532-5p	3.15762	0.95533	0	4.99692	3.1355	7.5618	2.16594	3.85327	3.2283	1.44463	0.580938	0.839242	1.78911	0.561282	0.999616
23631	ppt-MIR1077-3p	MIR1077-3p	2.10508	1.91066	3.25589	2.49846	3.1355	0.581677	0	1.28442	1.84646	1.61252	-0.580893	-0.936699	0.522427	0.561313	0.999616
22382	oha-let-7c-1-5p	let-7c-1-5p	35.7863	38.2132	0	0	83.0908	81.4348	0	0	29.8156	1.98445	0.580875	1.15272	2.22333	0.561324	0.999616
31233	piR-hsa-19157	piR-hsa-19157	3.15762	5.73198	3.25589	2.49846	0	2.32671	2.16594	3.85327	2.87373	1.45673	-0.580874	-0.846176	0.556257	0.561325	0.999616
22594	osa-MIR1853-3p	MIR1853-3p	2.10508	4.77665	8.13973	2.49846	0.783876	2.32671	3.2489	3.85327	3.46658	1.34059	-0.580804	-0.778621	0.582924	0.561373	0.999616
18386	gra-MIR8670b	MIR8670b	1.05254	3.82132	0	3.33128	0	1.74503	1.08297	1.28442	1.5397	1.78848	-0.580246	-1.03776	0.487084	0.561749	0.999616
24698	rno-mir-31a	mir-31a	1.05254	4.77665	0	0	4.70325	6.39845	1.08297	0	2.25173	1.8313	0.580113	1.06236	2.08835	0.561839	0.999616
24598	rno-miR-3572-5p	miR-3572-5p	0	2.86599	0	7.49538	0.783876	1.74503	0	2.56885	1.93239	1.85393	-0.579131	-1.07366	0.475111	0.562501	0.999616
220	aja-miR-144-5p	miR-144-5p	3609.16	0	2145.63	0	2640.09	4343.38	1772.82	3241.88	2219.12	1.83315	0.578321	1.06015	2.08515	0.563047	0.999616
21529	mtr-MIR1510b	MIR1510b	0	2.86599	6.51179	1.66564	0.783876	2.32671	2.16594	0	2.03999	1.69765	-0.578297	-0.981747	0.506366	0.563063	0.999616
3314	ath-MIR855	MIR855	3.15762	4.77665	1.62795	0	0.783876	1.16335	15.1616	1.28442	3.49443	1.59904	0.578254	0.924649	1.89822	0.563093	0.999616
40920	U79		0	1.91066	1.62795	0	0.783876	0.581677	1.08297	5.13769	1.3906	1.9133	0.577994	1.10588	2.1523	0.563268	0.999616
13945	bta-mir-135b	mir-135b	0	0.95533	0	4.1641	0	0	1.08297	11.5598	2.22028	2.0816	0.577634	1.2024	2.30123	0.563511	0.999616
15220	cme-MIR408	MIR408	3.15762	4.77665	1.62795	0	0.783876	1.74503	1.08297	1.28442	1.80731	1.65608	-0.577528	-0.95643	0.51533	0.563583	0.999616
29691	dre-miR-130c-2-5p	miR-130c-2-5p	0	0	6.51179	6.66256	2.35163	1.74503	2.16594	0	2.42962	1.78396	-0.577414	-1.03008	0.489682	0.56366	0.999616
23489	ppe-MIR395b	MIR395b	8.42032	0.95533	1.62795	0	0.783876	2.32671	2.16594	0	2.03501	1.76406	-0.577364	-1.01851	0.493627	0.563693	0.999616
10237	hsa-miR-617-3p	miR-617-3p	3.15762	1.91066	3.25589	0	0	0	0	3.85327	1.52218	2.10536	-0.577277	-1.21538	0.430661	0.563752	0.999616
20694	mdo-mir-7366	mir-7366	0	0	3.25589	4.99692	0.783876	1.74503	1.08297	0	1.48309	1.95298	-0.577187	-1.12723	0.457793	0.563813	0.999616
1240	mmu-miR-1194-3p	miR-1194-3p	4.21016	3.82132	6.51179	1.66564	5.48713	5.2351	8.66375	6.42211	5.25212	1.20482	0.576278	0.694312	1.61811	0.564427	0.999616
12505	ath-MIR869	MIR869	2.10508	5.73198	8.13973	2.49846	3.91938	1.16335	4.33187	1.28442	3.64678	1.33622	-0.575606	-0.769136	0.586769	0.564882	0.999616
8092	ptc-MIR6475	MIR6475	19.9983	7.64264	22.7912	4.99692	14.1098	19.1954	17.3275	34.6794	17.5926	1.09536	0.575454	0.630327	1.54792	0.564985	0.999616
1880	mmu-miR-6981-5p	miR-6981-5p	1.05254	2.86599	6.51179	0.83282	2.35163	1.16335	1.08297	1.28442	2.14319	1.51987	-0.574199	-0.872711	0.54612	0.565833	0.999616
9739	eca-mir-9080	mir-9080	0	1.91066	0	2.49846	1.56775	2.90839	2.16594	2.56885	1.7025	1.70329	0.573869	0.977467	1.96901	0.566056	0.999616
20720	mdo-mir-9b	mir-9b	141.04	85.9797	43.9545	106.601	84.6586	68.0562	70.3929	29.5417	78.7781	1.01005	-0.573694	-0.579459	0.669215	0.566175	0.999616
1462	mmu-miR-3103-5p	miR-3103-5p	4.21016	0.95533	3.25589	2.49846	1.56775	6.39845	6.49781	3.85327	3.65464	1.32866	0.573533	0.76203	1.69588	0.566284	0.999616
3784	bta-miR-324-3p	miR-324-3p	0	0	78.1414	49.9692	0	52.9326	0	0	22.6304	2.20974	-0.572524	-1.26513	0.416062	0.566967	0.999616
306	bta-miR-136-5p	miR-136-5p	0	4464.26	3115.89	5058.55	6418.37	6330.39	5857.78	4251.44	4437.08	1.49423	0.572105	0.854856	1.80858	0.567251	0.999616
2111	mmu-miR-7689-3p	miR-7689-3p	2.10508	2.86599	4.88384	0.83282	3.91938	1.16335	0	0	1.97131	1.70294	-0.571308	-0.972905	0.509479	0.567791	0.999616
1136	hsa-miR-8072-5p	miR-8072-5p	3.15762	0.95533	1.62795	0	7.05488	1.74503	2.16594	0	2.08834	1.72495	0.571111	0.985138	1.9795	0.567924	0.999616
23529	ppe-MIR6272	MIR6272	4.21016	0	0	1.66564	6.271	4.65342	1.08297	0	2.2354	1.80446	0.571089	1.03051	2.04275	0.567939	0.999616
37332	piR-hsa-4328	piR-hsa-4328	0	0.95533	4.88384	3.33128	3.1355	9.30684	2.16594	1.28442	3.13289	1.51371	0.57065	0.8638	1.81983	0.568237	0.999616
6263	hsa-mir-3941	mir-3941	0	0.95533	3.25589	0	0.783876	4.65342	1.08297	1.28442	1.50199	1.86832	0.57045	1.06578	2.0933	0.568373	0.999616
1114	hsa-miR-4532-5p	miR-4532-5p	15.7881	13.3746	26.0471	14.1579	11.7581	15.1236	10.8297	7.70654	14.3482	1.04658	-0.570318	-0.596885	0.66118	0.568462	0.999616
14283	cbr-mir-392	mir-392	0	3.82132	1.62795	4.1641	7.05488	4.07174	1.08297	5.13769	3.37008	1.45522	0.570116	0.829643	1.77725	0.568599	0.999616
16951	efu-miR-9334-3p	miR-9334-3p	1.05254	1.91066	3.25589	0.83282	3.91938	3.49006	0	5.13769	2.44988	1.54474	0.569846	0.880265	1.84071	0.568782	0.999616
5400	gga-mir-1736	mir-1736	3.15762	0	0	0.83282	0	2.90839	3.2489	2.56885	1.58957	1.90825	0.569401	1.08656	2.12367	0.569084	0.999616
566	ccr-miR-27d-3p	miR-27d-3p	44.2067	38.2132	29.303	39.9754	54.0874	56.4227	57.3973	53.9457	46.6939	0.960936	0.56918	0.546945	1.46099	0.569234	0.999616
37458	piR-hsa-4904	piR-hsa-4904	45.2592	19.1066	0	37.4769	16.4614	13.9603	9.74671	21.8352	20.4808	1.27186	-0.568852	-0.723502	0.605626	0.569457	0.999616
20744	mdv2-mir-M19	#NAME?	1.05254	2.86599	0	0	0	4.65342	4.33187	0	1.61298	2.07021	0.568837	1.17761	2.26202	0.569467	0.999616
28528	tca-miR-3851d-3p	miR-3851d-3p	2.10508	2.86599	0	0.83282	0.783876	2.32671	4.33187	3.85327	2.13745	1.56704	0.568587	0.891001	1.85446	0.569636	0.999616
21186	mmu-miR-6406-3p	miR-6406-3p	5.2627	0.95533	3.25589	0.83282	1.56775	2.32671	0	1.28442	1.9357	1.62432	-0.56836	-0.923196	0.527339	0.56979	0.999616
31772	piR-hsa-10079	piR-hsa-10079	14.7356	17.1959	27.6751	8.3282	11.7581	13.9603	11.9127	6.42211	13.9985	1.07122	-0.568348	-0.608826	0.65573	0.569799	0.999616
23141	pma-mir-4547	mir-4547	1.05254	4.77665	3.25589	0.83282	0.783876	0	3.2489	1.28442	1.90439	1.67563	-0.568229	-0.952143	0.516864	0.56988	0.999616
22815	osa-MIR5531-3p	MIR5531-3p	0	0.95533	3.25589	0.83282	3.1355	2.32671	2.16594	1.28442	1.74458	1.64948	0.567289	0.935733	1.91286	0.570518	0.999616
1393	mmu-miR-3057-5p	miR-3057-5p	225.243	194.887	363.032	185.719	181.075	146.001	116.961	219.636	204.069	0.961723	-0.567195	-0.545485	0.685161	0.570582	0.999616
40449	piR-hsa-6423	piR-hsa-6423	2.10508	1.91066	1.62795	0.83282	0.783876	1.74503	5.41484	3.85327	2.28419	1.48692	0.567147	0.843301	1.79415	0.570614	0.999616
262	bdi-MIR166i	MIR166i	0	1.91066	0	2.49846	0	0.581677	4.33187	5.13769	1.80755	1.89422	0.567035	1.07409	2.10539	0.57069	0.999616
17265	gga-miR-1608-5p	miR-1608-5p	0	1.91066	0	1.66564	0	3.49006	3.2489	1.28442	1.44996	1.93417	0.566492	1.09569	2.13716	0.571059	0.999616
6598	mdo-miR-126-3p	miR-126-3p	12.6305	0	0	0	0	0	0	5.13769	2.22102	2.42583	-0.566276	-1.37369	0.385903	0.571206	0.999616
27954	nve-miR-9437-1-3p	miR-9437-1-3p	5.2627	2.86599	3.25589	2.49846	1.56775	1.74503	1.08297	3.85327	2.76651	1.37289	-0.566188	-0.777311	0.583453	0.571266	0.999616
31766	piR-hsa-10057	piR-hsa-10057	0	2.86599	0	0.83282	0.783876	2.32671	1.08297	3.85327	1.4682	1.8245	0.56616	1.03296	2.04621	0.571285	0.999616
2262	mmu-mir-450a-1	mir-450a-1	8.42032	5.73198	16.2795	9.99384	7.05488	5.81677	5.41484	7.70654	8.30233	1.11127	-0.565334	-0.628239	0.646965	0.571847	0.999616
30017	mmu-mir-683-2	mir-683-2	0	3.82132	0	4.99692	1.56775	0.581677	2.16594	0	1.6417	1.88979	-0.565251	-1.0682	0.476913	0.571903	0.999616
14426	cel-miR-1832b-5p	miR-1832b-5p	3.15762	0.95533	0	1.66564	3.1355	2.90839	1.08297	3.85327	2.09484	1.55347	0.565045	0.877778	1.83754	0.572043	0.999616
9671	dvi-mir-996	mir-996	2.10508	1.91066	0	0	3.91938	2.32671	2.16594	0	1.55347	1.87838	0.564215	1.05981	2.08466	0.572608	0.999616
5564	ggo-mir-520c	mir-520c	0	1.91066	1.62795	0.83282	2.35163	1.16335	1.08297	3.85327	1.60283	1.68608	0.564179	0.95125	1.93355	0.572633	0.999616
19713	hsa-mir-3691	mir-3691	0	4.77665	0	5.82974	0	1.74503	3.2489	0	1.95004	1.97482	-0.563621	-1.11305	0.462315	0.573012	0.999616
22540	osa-MIR1437b-5p	MIR1437b-5p	0	0	0	3.33128	0.783876	1.16335	0	6.42211	1.46258	2.12886	0.563417	1.19944	2.2965	0.573151	0.999616
18026	gma-MIR169u	MIR169u	5.2627	5.73198	0	0.83282	0.783876	1.16335	2.16594	2.56885	2.31369	1.57241	-0.563188	-0.88556	0.541277	0.573307	0.999616
31009	piR-hsa-28223	piR-hsa-28223	114.727	161.451	120.468	138.248	161.478	140.766	112.629	372.483	165.281	0.988671	0.563169	0.556788	1.47099	0.57332	0.999616
20336	lus-MIR169j-5p	MIR169j-5p	0	5.73198	1.62795	1.66564	1.56775	1.74503	1.08297	0	1.67766	1.7605	-0.56315	-0.991422	0.502982	0.573333	0.999616
18981	hsa-miR-3147-5p	miR-3147-5p	1.05254	1.91066	1.62795	2.49846	2.35163	2.90839	2.16594	5.13769	2.45666	1.41452	0.562792	0.796081	1.73638	0.573577	0.999616
20471	mdm-MIR396c	MIR396c	2.10508	4.77665	0	3.33128	3.91938	0	1.08297	0	1.90192	1.84216	-0.562721	-1.03662	0.487468	0.573625	0.999616
25922	tca-mir-6018	mir-6018	23.1559	0	0	0	0	2.90839	5.41484	2.56885	4.25599	1.95853	-0.562277	-1.10124	0.466116	0.573927	0.999616
38280	piR-hsa-8699	piR-hsa-8699	4.21016	1.91066	1.62795	2.49846	4.70325	4.07174	3.2489	5.13769	3.4261	1.29823	0.561785	0.729327	1.65787	0.574262	0.999616
22916	pab-MIR3697-5p	MIR3697-5p	1.05254	3.82132	13.0236	2.49846	7.05488	8.72516	9.74671	6.42211	6.54309	1.24042	0.561756	0.696812	1.62092	0.574282	0.999616
33014	piR-hsa-14387	piR-hsa-14387	30.5236	28.6599	40.6987	28.3159	87.0102	30.2472	40.0698	32.1106	39.7045	1.00918	0.5614	0.566556	1.48098	0.574525	0.999616
12082	ame-mir-79	mir-79	0	8.59797	1.62795	2.49846	0	1.16335	4.33187	1.28442	2.438	1.70453	-0.560883	-0.95604	0.51547	0.574877	0.999616
22541	osa-MIR1441	MIR1441	0	4.77665	1.62795	3.33128	1.56775	0	1.08297	2.56885	1.86943	1.74864	-0.559812	-0.978911	0.507363	0.575608	0.999616
539	ccr-miR-140-3p	miR-140-3p	10.5254	18.1513	17.9074	14.9908	29.0034	26.7572	22.7423	12.8442	19.1152	1.02731	0.559551	0.574831	1.4895	0.575785	0.999616
24824	sbi-MIR5387a	MIR5387a	2.10508	4.77665	3.25589	1.66564	4.70325	3.49006	8.66375	2.56885	3.90365	1.29138	0.55938	0.722373	1.64989	0.575903	0.999616
18203	gma-MIR5376	MIR5376	53.6795	21.9726	4.88384	21.6533	14.1098	16.8686	21.6594	14.1286	21.1195	1.10763	-0.559	-0.619163	0.651049	0.576162	0.999616
22942	pde-MIR3704a	MIR3704a	0	4.77665	0	0	0	4.65342	2.16594	3.85327	1.93116	2.0017	0.558529	1.11801	2.17047	0.576483	0.999616
17853	ggo-mir-520g	mir-520g	2.10508	0	1.62795	0	0	1.74503	2.16594	3.85327	1.43716	1.96868	0.558316	1.09915	2.14228	0.576628	0.999616
35473	piR-hsa-25006	piR-hsa-25006	0	0.95533	1.62795	4.99692	1.56775	1.74503	2.16594	8.99096	2.75623	1.55683	0.557841	0.868464	1.82572	0.576953	0.999616
35826	piR-hsa-2672	piR-hsa-2672	3.15762	2.86599	1.62795	0.83282	0	2.90839	1.08297	0	1.55947	1.79141	-0.557725	-0.999113	0.500308	0.577032	0.999616
2672	ssc-miR-4335-5p	miR-4335-5p	3767.04	3674.2	6143.87	2910.71	14043.9	3117.21	3948.5	3484.64	5136.26	1.03357	0.557555	0.576271	1.49099	0.577149	0.999616
13331	bmo-miR-3330-3p	miR-3330-3p	5.2627	5.73198	4.88384	2.49846	1.56775	1.74503	5.41484	2.56885	3.70918	1.2937	-0.557525	-0.721272	0.606562	0.577169	0.999616
11171	sha-mir-150	mir-150	0	1.91066	0	4.99692	3.91938	4.65342	2.16594	2.56885	2.52689	1.59512	0.55638	0.887493	1.84996	0.577951	0.999616
3132	ame-miR-9891-5p	miR-9891-5p	4.21016	1.91066	13.0236	0	2.35163	1.16335	6.49781	0	3.64465	1.62167	-0.555998	-0.901645	0.535276	0.578212	0.999616
299	bta-miR-130b-3p	miR-130b-3p	0	0	918.162	1030.2	0	0	0	732.121	335.06	2.54073	-0.555911	-1.41242	0.375682	0.578272	0.999616
1468	mmu-miR-3110-5p	miR-3110-5p	1.05254	2.86599	4.88384	3.33128	7.05488	2.32671	6.49781	3.85327	3.98329	1.29298	0.555594	0.718371	1.64532	0.578488	0.999616
23502	ppe-MIR399a	MIR399a	0	5.73198	4.88384	2.49846	0	0	5.41484	1.28442	2.47669	1.82512	-0.555162	-1.01324	0.495432	0.578784	0.999616
17821	ggo-mir-34b	mir-34b	5.2627	5.73198	3.25589	0.83282	1.56775	3.49006	1.08297	2.56885	2.97413	1.39252	-0.554709	-0.772445	0.585424	0.579094	0.999616
17297	gga-miR-1667-5p	miR-1667-5p	0	0.95533	3.25589	4.99692	0.783876	0.581677	1.08297	2.56885	1.77819	1.68921	-0.554531	-0.93672	0.522419	0.579216	0.999616
758	cgr-mir-200b	mir-200b	13.683	0	1.62795	0.83282	0	0	0	7.70654	2.98129	2.04797	-0.55412	-1.13482	0.455391	0.579497	0.999616
3426	bdi-MIR167b	MIR167b	3.15762	46.8112	4.88384	17.4892	29.0034	15.7053	6.49781	66.79	23.7923	1.25354	0.55404	0.694512	1.61834	0.579552	0.999616
274	bmo-miR-2779-5p	miR-2779-5p	23.1559	17.1959	32.5589	16.6564	5.48713	12.2152	16.2445	25.6885	18.6503	1.06713	-0.553965	-0.591154	0.663812	0.579603	0.999616
7533	osa-MIR396h	MIR396h	2.10508	3.82132	1.62795	1.66564	0.783876	0.581677	0	3.85327	1.80485	1.65077	-0.552938	-0.912775	0.531163	0.580306	0.999616
16236	dre-mir-27d	mir-27d	10.5254	5.73198	0	4.99692	3.91938	6.39845	0	1.28442	4.10707	1.53236	-0.552827	-0.847127	0.555891	0.580382	0.999616
18400	gra-MIR8687	MIR8687	0	2.86599	0	2.49846	0.783876	2.90839	7.58078	0	2.07969	1.82793	0.552134	1.00926	2.01288	0.580856	0.999616
13741	bta-miR-2323-3p	miR-2323-3p	2.10508	0.95533	3.25589	0.83282	0.783876	0.581677	1.08297	1.28442	1.36026	1.68896	-0.550997	-0.930611	0.524636	0.581636	0.999616
687	cgr-miR-296-5p	miR-296-5p	637.839	515.878	579.549	500.525	0	481.047	468.925	359.638	442.925	1.39897	-0.550672	-0.770377	0.586264	0.581858	0.999616
1812	mmu-miR-693-3p	miR-693-3p	3.15762	4.77665	11.3956	5.82974	3.1355	6.39845	4.33187	1.28442	5.03874	1.24657	-0.550593	-0.686353	0.621423	0.581913	0.999616
226	aja-miR-29c-3p	miR-29c-3p	30.5236	17.1959	0	0	1.56775	20.9404	1.08297	0	8.91384	1.8099	-0.550464	-0.996287	0.501288	0.582001	0.999616
2686	tca-miR-92a-3p	miR-92a-3p	1.05254	2.86599	3.25589	2.49846	3.1355	4.07174	7.58078	1.28442	3.21817	1.36014	0.550324	0.748516	1.68006	0.582097	0.999616
8349	sha-mir-205	mir-205	44.2067	22.9279	21.1633	51.6349	31.355	26.7572	16.2445	20.5508	29.355	1.01848	-0.550201	-0.560369	0.678129	0.582181	0.999616
19949	hsa-mir-6790	mir-6790	74.7303	43.9452	32.5589	33.3128	48.6003	29.0839	15.1616	32.1106	38.6879	1.02145	-0.550111	-0.561913	0.677403	0.582243	0.999616
27588	hsa-miR-5680-5p	miR-5680-5p	1.05254	1.91066	4.88384	3.33128	1.56775	0	2.16594	2.56885	2.18511	1.57672	-0.549804	-0.866885	0.548329	0.582454	0.999616
24198	ptc-MIR6442	MIR6442	0	2.86599	0	1.66564	3.91938	1.74503	2.16594	1.28442	1.7058	1.72047	0.54918	0.944849	1.92499	0.582882	0.999616
37522	piR-hsa-5245	piR-hsa-5245	1.05254	2.86599	4.88384	3.33128	0.783876	3.49006	1.08297	1.28442	2.34687	1.46814	-0.549028	-0.806047	0.571947	0.582986	0.999616
2023	mmu-miR-7089-5p	miR-7089-5p	4.21016	5.73198	3.25589	2.49846	0.783876	2.90839	3.2489	2.56885	3.15081	1.33778	-0.548815	-0.734194	0.601154	0.583133	0.999616
24493	rgl-MIR5141	MIR5141	3.15762	2.86599	0	0	3.1355	3.49006	2.16594	2.56885	2.17299	1.62702	0.548741	0.892815	1.8568	0.583183	0.999616
31062	piR-hsa-6842	piR-hsa-6842	0	0	0	25.8174	0	22.6854	0	35.9638	10.5583	2.12895	0.548526	1.16778	2.24666	0.583331	0.999616
372	bta-miR-26b-3p	miR-26b-3p	0	0	56.9781	0	0	0	71.4759	61.6523	23.7633	2.24783	0.548448	1.23282	2.35026	0.583384	0.999616
11936	ame-miR-3780-5p	miR-3780-5p	3.15762	4.77665	3.25589	1.66564	2.35163	2.32671	0	2.56885	2.51287	1.47474	-0.548043	-0.808218	0.571087	0.583663	0.999616
564	ccr-miR-27a-3p	miR-27a-3p	0	0	5914.33	0	9927.78	0	6887.68	0	2841.22	2.75283	0.547652	1.5076	2.84336	0.583931	0.999616
1713	mmu-miR-6546-5p	miR-6546-5p	14.7356	12.4193	16.2795	17.4892	14.1098	21.5221	14.0786	41.1015	18.9669	1.04427	0.547539	0.571777	1.48635	0.584008	0.999616
6392	hsa-mir-6827	mir-6827	7.36778	5.73198	11.3956	3.33128	2.35163	3.49006	5.41484	6.42211	5.68816	1.19663	-0.547528	-0.655187	0.634993	0.584016	0.999616
28603	xtr-miR-302-3p	miR-302-3p	0	2.86599	0	0.83282	0.783876	1.16335	2.16594	3.85327	1.45816	1.8233	0.547454	0.998173	1.99747	0.584067	0.999616
2283	mmu-mir-5098	mir-5098	1.05254	13.3746	4.88384	5.82974	1.56775	2.32671	5.41484	6.42211	5.10902	1.30284	-0.547273	-0.713007	0.610047	0.584191	0.999616
40730	U55		26.3135	8.59797	13.0236	13.3251	14.8936	9.88851	5.41484	10.2754	12.7166	1.08679	-0.546865	-0.594327	0.662353	0.584472	0.999616
37126	piR-hsa-3404	piR-hsa-3404	2.10508	19.1066	6.51179	13.3251	4.70325	12.7969	6.49781	42.3859	13.4291	1.23609	0.546488	0.675507	1.59716	0.584731	0.999616
3011	age-miR-127-5p	miR-127-5p	189.457	192.021	157.911	172.394	228.892	0	0	152.846	136.69	1.64548	-0.546462	-0.89919	0.536188	0.584748	0.999616
552	ccr-miR-183-5p	miR-183-5p	1.05254	0.95533	6.51179	0.83282	2.35163	0	1.08297	1.28442	1.75894	1.7235	-0.546414	-0.941743	0.520604	0.584781	0.999616
11477	aau-MIR160	MIR160	3.15762	0	3.25589	2.49846	0.783876	0.581677	2.16594	1.28442	1.71599	1.6667	-0.546311	-0.910535	0.531988	0.584852	0.999616
36421	piR-hsa-29426	piR-hsa-29426	0	2.86599	0	4.99692	0	0.581677	2.16594	1.28442	1.48687	1.95314	-0.546077	-1.06656	0.477455	0.585013	0.999616
30986	piR-hsa-26747	piR-hsa-26747	19.9983	51.5878	32.5589	42.4738	55.6552	33.7373	20.5764	109.176	45.7204	1.05693	0.545131	0.576163	1.49088	0.585663	0.999616
7843	ppt-MIR1031b	MIR1031b	0	0.95533	0	2.49846	3.1355	4.65342	0	0	1.40534	2.09356	0.545124	1.14125	2.20572	0.585668	0.999616
18886	hsa-miR-1205-3p	miR-1205-3p	1.05254	0.95533	6.51179	0.83282	3.1355	1.16335	0	0	1.70642	1.80098	-0.545072	-0.981664	0.506395	0.585704	0.999616
515	bta-mir-4444	mir-4444	4.21016	0	0	5.82974	3.91938	4.07174	6.49781	3.85327	3.54776	1.50952	0.544968	0.822639	1.76864	0.585775	0.999616
19177	hsa-miR-451a	miR-451a	189.457	0	146.515	0	138.746	0	0	0	59.3398	2.3383	-0.544877	-1.27409	0.413486	0.585838	0.999616
463	bta-miR-496-3p	miR-496-3p	579.949	530.208	822.113	311.475	440.538	381.58	507.912	0	446.722	1.38462	-0.544619	-0.754091	0.59292	0.586016	0.999616
31047	piR-hsa-5770	piR-hsa-5770	22.1033	115.595	26.0471	56.6318	14.8936	23.2671	259.912	52.6613	71.3889	1.22472	0.54461	0.666994	1.58776	0.586022	0.999616
31649	piR-hsa-25274	piR-hsa-25274	0	18.1513	0	0	0	0	7.58078	0	3.21651	2.37059	-0.544545	-1.29089	0.408698	0.586066	0.999616
33360	piR-hsa-15796	piR-hsa-15796	11.5779	4.77665	3.25589	9.16102	2.35163	5.2351	3.2489	7.70654	5.91421	1.20675	-0.544411	-0.656968	0.63421	0.586159	0.999616
4986	efu-mir-103b	mir-103b	8.42032	9.5533	9.76768	12.4923	5.48713	3.49006	7.58078	10.2754	8.38337	1.11146	-0.544033	-0.604671	0.657621	0.586419	0.999616
1296	mmu-miR-1934-3p	miR-1934-3p	3.15762	1.91066	4.88384	4.1641	0.783876	0	1.08297	6.42211	2.80065	1.55248	-0.544015	-0.844572	0.556876	0.586431	0.999616
16768	efu-miR-136-5p	miR-136-5p	48.4168	0	0	0	50.168	59.9128	0	0	19.8122	2.18087	0.543975	1.18634	2.27575	0.586459	0.999616
37717	piR-hsa-5987	piR-hsa-5987	5.2627	0.95533	1.62795	0.83282	0	1.16335	3.2489	0	1.63638	1.80759	-0.543067	-0.981644	0.506402	0.587084	0.999616
35264	piR-hsa-24196	piR-hsa-24196	1.05254	3.82132	4.88384	2.49846	1.56775	2.90839	1.08297	1.28442	2.38746	1.44093	-0.542593	-0.781838	0.581625	0.58741	0.999616
1777	mmu-miR-6902-5p	miR-6902-5p	6.31524	0.95533	0	4.1641	5.48713	5.81677	3.2489	5.13769	3.89065	1.38876	0.542497	0.753398	1.68576	0.587476	0.999616
13319	bmo-miR-3302-5p	miR-3302-5p	3.15762	2.86599	0	8.3282	4.70325	7.5618	3.2489	8.99096	4.85709	1.33968	0.542307	0.726521	1.65464	0.587607	0.999616
21631	mtr-MIR2605	MIR2605	2.10508	0	1.62795	0	0	1.74503	3.2489	2.56885	1.41198	1.97085	0.541997	1.06819	2.09681	0.587821	0.999616
1850	mmu-miR-6956-5p	miR-6956-5p	1.05254	1.91066	6.51179	3.33128	1.56775	1.16335	4.33187	0	2.48366	1.53243	-0.541643	-0.83003	0.562518	0.588064	0.999616
18324	gra-MIR7492h-3p	MIR7492h-3p	19.9983	12.4193	3.25589	14.9908	10.1904	12.2152	5.41484	5.13769	10.4528	1.14092	-0.541108	-0.61736	0.651863	0.588433	0.999616
14860	chi-miR-24-3p	miR-24-3p	0	0	0	59.9631	70.5488	0	0	68.0744	24.8233	2.2236	0.540781	1.20248	2.30135	0.588659	0.999616
17456	gga-miR-6606-3p	miR-6606-3p	1.05254	0	6.51179	3.33128	1.56775	1.74503	2.16594	0	2.04679	1.69804	-0.540685	-0.918103	0.529204	0.588725	0.999616
11351	tni-miR-223-3p	miR-223-3p	0	4.77665	0	2.49846	0	0	3.2489	0	1.3155	2.31368	-0.540276	-1.25003	0.42044	0.589007	0.999616
1506	mmu-miR-3473d-5p	miR-3473d-5p	22.1033	14.3299	19.5354	11.6595	14.1098	16.8686	8.66375	5.13769	14.051	1.07177	-0.540055	-0.578815	0.669513	0.589159	0.999616
19327	hsa-miR-548o-5p	miR-548o-5p	2.10508	17.1959	8.13973	4.99692	2.35163	11.0519	1.08297	39.8171	10.8427	1.35469	0.540054	0.731606	1.66049	0.589159	0.999616
5299	gga-miR-6568-3p	miR-6568-3p	5.2627	4.77665	9.76768	1.66564	3.91938	2.32671	4.33187	2.56885	4.32743	1.26563	-0.539933	-0.683353	0.622716	0.589243	0.999616
24883	sha-mir-1549	mir-1549	2.10508	0.95533	9.76768	4.1641	2.35163	2.90839	3.2489	1.28442	3.34819	1.37477	-0.539932	-0.742282	0.597793	0.589244	0.999616
24684	rno-mir-216b	mir-216b	11.5779	2.86599	0	0	0	19.777	5.41484	2.56885	5.27558	1.75284	0.53984	0.946251	1.92686	0.589307	0.999616
20874	mml-miR-425-3p	miR-425-3p	8.42032	5.73198	8.13973	2.49846	2.35163	4.65342	2.16594	6.42211	5.04795	1.23096	-0.539809	-0.664485	0.630914	0.589329	0.999616
18440	gra-MIR8736	MIR8736	1.05254	3.82132	0	0	0	0	2.16594	8.99096	2.00384	2.07274	0.539472	1.11818	2.17074	0.589561	0.999616
32902	piR-hsa-13967	piR-hsa-13967	1.05254	4.77665	0	1.66564	0	3.49006	9.74671	1.28442	2.752	1.67644	0.539218	0.903967	1.8712	0.589737	0.999616
17044	efu-mir-9247	mir-9247	0	1.91066	8.13973	0	0.783876	0.581677	1.08297	2.56885	1.88347	1.81803	-0.539104	-0.980108	0.506942	0.589815	0.999616
30124	pxy-mir-8535-2	mir-8535-2	1.05254	1.91066	3.25589	2.49846	0.783876	0.581677	1.08297	2.56885	1.71686	1.57689	-0.53897	-0.849897	0.554824	0.589908	0.999616
1209	mml-miR-145-5p	miR-145-5p	0	0	501.407	0.83282	0.783876	0	750.497	409.731	207.906	2.24787	0.538253	1.20992	2.31325	0.590402	0.999616
13716	bta-miR-2285y-5p	miR-2285y-5p	1.05254	2.86599	1.62795	1.66564	0.783876	1.74503	1.08297	0	1.353	1.72517	-0.538125	-0.928356	0.525457	0.590491	0.999616
12345	ath-MIR169n	MIR169n	1.05254	0.95533	0	2.49846	1.56775	1.16335	6.49781	0	1.71691	1.77304	0.537785	0.953513	1.93658	0.590725	0.999616
22472	ola-miR-193a-3p	miR-193a-3p	1.05254	18.1513	13.0236	0	0.783876	36.064	2.16594	17.9819	11.1529	1.55532	0.537466	0.835934	1.78501	0.590945	0.999616
2234	mmu-mir-328	mir-328	475.748	382.132	555.13	338.958	298.657	317.014	291.318	328.812	373.471	0.936948	-0.537199	-0.503328	0.705478	0.59113	0.999616
19421	hsa-miR-6503-3p	miR-6503-3p	2.10508	0	4.88384	0.83282	0	1.16335	0	2.56885	1.44424	1.97092	-0.53696	-1.05831	0.480195	0.591295	0.999616
1936	mmu-miR-702-3p	miR-702-3p	26.3135	26.7492	40.6987	51.6349	21.1646	19.777	24.9083	34.6794	30.7407	0.999051	-0.536314	-0.535805	0.689774	0.591741	0.999616
16726	eca-mir-8921-1	mir-8921-1	0	0.95533	11.3956	1.66564	0.783876	0.581677	1.08297	5.13769	2.70035	1.6558	-0.536006	-0.887521	0.540542	0.591954	0.999616
1106	hsa-miR-4454-5p	miR-4454-5p	1585.12	1257.21	2604.71	1124.31	5435.39	1345.42	1525.9	1346.07	2028.02	1.03537	0.535931	0.554886	1.46905	0.592006	0.999616
15834	dme-miR-979-3p	miR-979-3p	1.05254	5.73198	0	0.83282	1.56775	2.32671	7.58078	2.56885	2.70768	1.54063	0.535012	0.824253	1.77062	0.592642	0.999616
270	bma-let-7-5p	let-7-5p	38065.1	556.957	47778.6	768.693	673.349	45694.8	961.676	721.845	16902.6	1.60602	-0.53498	-0.85919	0.551262	0.592664	0.999616
37624	piR-hsa-5583	piR-hsa-5583	0	3.82132	0	0	4.70325	4.07174	0	0	1.57454	2.22863	0.534959	1.19222	2.28505	0.592678	0.999616
25277	spu-miR-4848b-5p	miR-4848b-5p	4.21016	2.86599	0	0	1.56775	0.581677	0	1.28442	1.31375	1.99122	-0.534741	-1.06479	0.478042	0.592829	0.999616
1834	mmu-miR-6945-3p	miR-6945-3p	17.8932	14.3299	27.6751	20.8205	16.4614	16.287	12.9956	8.99096	16.9317	1.02973	-0.53473	-0.550627	0.682723	0.592836	0.999616
40901	U108		0	1.91066	6.51179	0.83282	0.783876	0.581677	2.16594	1.28442	1.7589	1.70797	-0.534151	-0.912316	0.531331	0.593237	0.999616
40865	ACA5		1.05254	0.95533	0	2.49846	0.783876	1.16335	3.2489	3.85327	1.69447	1.66144	0.533715	0.886732	1.84898	0.593539	0.999616
27329	gga-miR-1813-1-5p	miR-1813-1-5p	18.9457	22.9279	13.0236	29.1487	34.4905	36.6457	29.2401	21.8352	25.7822	1.00692	0.53347	0.537163	1.45112	0.593708	0.999616
3600	bmo-miR-3219-3p	miR-3219-3p	0	2.86599	3.25589	1.66564	0	0	0	3.85327	1.4551	2.11233	-0.533388	-1.12669	0.457965	0.593765	0.999616
31052	piR-hsa-5939	piR-hsa-5939	1576.7	1863.85	1973.07	1225.08	779.956	887.64	1748.99	1244.61	1412.49	0.956832	-0.533259	-0.51024	0.702106	0.593854	0.999616
2718	xtr-let-7a-5p	let-7a-5p	38.944	37.2579	3.25589	38.3097	48.6003	36.064	59.5633	33.395	36.9237	1.09996	0.533238	0.586542	1.50164	0.593869	0.999616
1018	ggo-mir-142	mir-142	3.15762	0	0	0.83282	3.91938	1.74503	0	2.56885	1.52796	1.91209	0.532907	1.01897	2.02647	0.594098	0.999616
21691	mtr-MIR2655i	MIR2655i	0	2.86599	4.88384	3.33128	3.1355	0	0	2.56885	2.09818	1.81456	-0.53261	-0.966453	0.511763	0.594304	0.999616
17691	gga-mir-6572	mir-6572	0	0.95533	1.62795	1.66564	0	4.65342	2.16594	1.28442	1.54409	1.82594	0.53235	0.972039	1.96161	0.594483	0.999616
21577	mtr-MIR2587a	MIR2587a	0	0	11.3956	0.83282	0	2.32671	2.16594	1.28442	2.25069	1.90301	-0.532096	-1.01258	0.495658	0.594659	0.999616
16727	eca-mir-8944	mir-8944	0	11.464	0	2.49846	7.05488	2.32671	4.33187	11.5598	4.90446	1.52928	0.53208	0.8137	1.75771	0.594671	0.999616
2077	mmu-miR-7655-5p	miR-7655-5p	9.47286	12.4193	14.6515	7.49538	14.1098	14.5419	14.0786	21.8352	13.5756	1.04621	0.531472	0.556029	1.47022	0.595092	0.999616
1595	mmu-miR-467h-3p	miR-467h-3p	5.2627	1.91066	6.51179	1.66564	1.56775	2.90839	3.2489	1.28442	3.04503	1.36602	-0.531411	-0.725918	0.604612	0.595134	0.999616
14290	cbr-mir-54d	mir-54d	1.05254	7.64264	1.62795	0	0.783876	2.32671	2.16594	0	1.94996	1.76514	-0.531232	-0.937697	0.522066	0.595258	0.999616
8374	sja-mir-3488	mir-3488	5.2627	1.91066	0	0	0	1.16335	1.08297	1.28442	1.33801	1.99804	-0.531078	-1.06112	0.479261	0.595365	0.999616
531	ccr-miR-10d-5p	miR-10d-5p	10.5254	8.59797	13.0236	11.6595	13.3259	12.2152	19.4934	19.2663	13.5134	1.04067	0.530887	0.552477	1.4666	0.595497	0.999616
373	bta-miR-26b-5p	miR-26b-5p	0	13371.7	18644.9	0	17164.5	17392.2	15687.9	14751.6	12126.6	1.92652	0.530286	1.02161	2.03018	0.595913	0.999616
1203	mdo-miR-497-5p	miR-497-5p	1.05254	3.82132	1.62795	4.99692	6.271	1.16335	4.33187	7.70654	3.87144	1.34364	0.529845	0.711919	1.63798	0.59622	0.999616
28069	osa-MIR5791-5p	MIR5791-5p	3.15762	0	0	0.83282	0	0	6.49781	2.56885	1.63214	2.1147	0.529747	1.12025	2.17385	0.596287	0.999616
1415	mmu-miR-3073a-3p	miR-3073a-3p	6.31524	10.5086	4.88384	17.4892	5.48713	6.98013	3.2489	10.2754	8.14856	1.15404	-0.52952	-0.61109	0.654702	0.596445	0.999616
2061	mmu-miR-743a-3p	miR-743a-3p	0	0.95533	0	5.82974	3.1355	6.98013	3.2489	0	2.5187	1.77462	0.529355	0.939403	1.91773	0.596559	0.999616
27893	mtr-MIR2111n	MIR2111n	5.2627	2.86599	0	0.83282	0	2.32671	1.08297	1.28442	1.70695	1.7697	-0.529118	-0.936381	0.522542	0.596724	0.999616
623	cfa-mir-200a	mir-200a	9.47286	15.2853	11.3956	3.33128	5.48713	13.3786	2.16594	3.85327	8.04624	1.20317	-0.528651	-0.636054	0.64347	0.597048	0.999616
40707	U14A		12.6305	10.5086	8.13973	7.49538	7.05488	10.4702	16.2445	24.404	12.1185	1.08622	0.528555	0.574128	1.48878	0.597114	0.999616
18841	hme-mir-2756	mir-2756	2.10508	2.86599	3.25589	3.33128	1.56775	3.49006	0	1.28442	2.23756	1.51986	-0.528088	-0.802618	0.573308	0.597438	0.999616
9216	bmo-mir-3422	mir-3422	32.6287	0	0	0	26.6518	0	45.4847	0	13.0956	2.16183	0.528	1.14145	2.20602	0.597499	0.999616
11666	aga-mir-1174	mir-1174	17.8932	47.7665	56.9781	6.66256	8.62263	28.5022	41.1528	5.13769	26.5895	1.18717	-0.526999	-0.625638	0.648133	0.598194	0.999616
355	bta-miR-204-5p	miR-204-5p	13.683	20.0619	0	0	36.0583	0	32.489	0	12.7865	1.93004	0.52691	1.01696	2.02364	0.598256	0.999616
18115	gma-MIR4371b	MIR4371b	5.2627	5.73198	13.0236	3.33128	4.70325	5.2351	2.16594	5.13769	5.57394	1.20649	-0.526195	-0.634846	0.644009	0.598753	0.999616
24934	sja-mir-3502	mir-3502	0	0.95533	4.88384	0	0.783876	1.74503	6.49781	1.28442	2.01879	1.77912	0.525284	0.934542	1.91128	0.599386	0.999616
15435	crm-mir-64d	mir-64d	0	0.95533	4.88384	3.33128	2.35163	0	2.16594	0	1.711	1.89693	-0.525017	-0.995917	0.501417	0.599572	0.999616
21906	nta-MIR168c	MIR168c	1.05254	1.91066	1.62795	1.66564	0	3.49006	6.49781	1.28442	2.19114	1.60745	0.52487	0.843702	1.79465	0.599673	0.999616
4601	dre-mir-2187	mir-2187	21.0508	20.0619	19.5354	29.9815	18.813	0	15.1616	23.1196	18.4655	1.29019	-0.524315	-0.676464	0.625697	0.60006	0.999616
17832	ggo-mir-424	mir-424	3.15762	2.86599	1.62795	3.33128	0.783876	0	3.2489	2.56885	2.19806	1.57238	-0.524229	-0.824287	0.564761	0.600119	0.999616
657	cgr-miR-1839-3p	miR-1839-3p	87.3608	0	0	0	0	0	102.882	97.6161	35.9824	2.28336	0.523906	1.19627	2.29146	0.600344	0.999616
12666	bbe-mir-29a	mir-29a	4.21016	14.3299	0	9.16102	3.1355	2.32671	4.33187	7.70654	5.65022	1.34898	-0.523722	-0.70649	0.612809	0.600472	0.999616
2094	mmu-miR-7670-3p	miR-7670-3p	6.31524	6.68731	8.13973	8.3282	4.70325	9.30684	3.2489	1.28442	6.00174	1.20748	-0.523639	-0.632282	0.645155	0.600529	0.999616
22372	odi-mir-1499	mir-1499	4.21016	2.86599	0	2.49846	0	7.5618	3.2489	6.42211	3.35093	1.55653	0.523036	0.814122	1.75823	0.600949	0.999616
16103	dpu-miR-193-3p	miR-193-3p	1.05254	2.86599	0	0	0	2.32671	0	6.42211	1.58342	2.09238	0.522657	1.09359	2.13405	0.601213	0.999616
2284	mmu-mir-5122	mir-5122	1.05254	1.91066	4.88384	0	1.56775	0	2.16594	0	1.44759	1.97113	-0.522281	-1.02948	0.489886	0.601475	0.999616
2045	mmu-miR-7224-3p	miR-7224-3p	6.31524	2.86599	3.25589	1.66564	7.05488	5.2351	8.66375	1.28442	4.54261	1.2867	0.521957	0.671604	1.59284	0.6017	0.999616
18055	gma-MIR319m	MIR319m	2.10508	1.91066	0	3.33128	0	0.581677	3.2489	0	1.3972	1.94255	-0.521571	-1.01318	0.495454	0.601969	0.999616
12300	ata-MIR169j	MIR169j	0	0	11.3956	0	0	2.32671	0	2.56885	2.0364	2.22982	-0.521526	-1.16291	0.446612	0.602001	0.999616
12538	atr-MIR8552a-5p	MIR8552a-5p	8.42032	0	0	0.83282	0	1.16335	3.2489	0	1.70817	2.08401	-0.521479	-1.08677	0.470814	0.602033	0.999616
12490	ath-MIR845a	MIR845a	1.05254	3.82132	1.62795	0.83282	0	0.581677	3.2489	0	1.39565	1.87224	-0.521397	-0.976181	0.508324	0.60209	0.999616
19779	hsa-mir-454	mir-454	1.05254	18.1513	0	19.1549	0	24.4304	32.489	11.5598	13.3547	1.57813	0.521226	0.822562	1.76854	0.602209	0.999616
6384	hsa-mir-6770-1	mir-6770-1	3.15762	1.91066	1.62795	0.83282	0.783876	0	2.16594	1.28442	1.47041	1.73666	-0.520589	-0.904087	0.534371	0.602653	0.999616
2349	mmu-mir-708	mir-708	4.21016	1.91066	1.62795	1.66564	0	1.74503	1.08297	2.56885	1.85141	1.61234	-0.520449	-0.839139	0.558977	0.602751	0.999616
40739	U65		3.15762	0.95533	8.13973	1.66564	3.91938	6.98013	6.49781	3.85327	4.39611	1.29772	0.520327	0.67524	1.59686	0.602835	0.999616
13564	bna-MIR169a	MIR169a	3.15762	2.86599	0	1.66564	0.783876	1.16335	2.16594	0	1.4753	1.76661	-0.520141	-0.918889	0.528916	0.602965	0.999616
7562	osa-MIR5339	MIR5339	1.05254	2.86599	1.62795	2.49846	0.783876	2.32671	1.08297	0	1.52981	1.67612	-0.519691	-0.871067	0.546743	0.603279	0.999616
21097	mmu-miR-1932-5p	miR-1932-5p	17.8932	21.9726	39.0707	13.3251	14.8936	12.7969	15.1616	20.5508	19.4581	1.03427	-0.519653	-0.537463	0.688982	0.603305	0.999616
7196	nve-miR-9456-1-3p	miR-9456-1-3p	1.05254	5.73198	0	5.82974	7.05488	5.81677	1.08297	7.70654	4.28443	1.42034	0.519403	0.73773	1.66755	0.60348	0.999616
7327	oan-mir-449b	mir-449b	1.05254	3.82132	3.25589	0	0	1.74503	2.16594	0	1.50509	1.93115	-0.519337	-1.00292	0.49899	0.603526	0.999616
14607	cfa-miR-135b-3p	miR-135b-3p	0	4.77665	4.88384	0.83282	0	4.65342	0	0	1.89334	2.03108	-0.519318	-1.05478	0.481372	0.603539	0.999616
16585	eca-miR-9059-5p	miR-9059-5p	0	0.95533	0	2.49846	0.783876	1.74503	2.16594	2.56885	1.33968	1.83408	0.519035	0.95195	1.93449	0.603736	0.999616
2147	mmu-miR-881-3p	miR-881-3p	35.7863	129.925	27.6751	92.4431	83.0908	258.265	58.4803	29.5417	89.4009	1.13144	0.518997	0.587216	1.50234	0.603763	0.999616
16788	efu-miR-2683-5p	miR-2683-5p	1.05254	0.95533	4.88384	2.49846	2.35163	5.81677	5.41484	1.28442	3.03223	1.40516	0.518066	0.727966	1.6563	0.604412	0.999616
1982	mmu-miR-7054-5p	miR-7054-5p	1.05254	0.95533	8.13973	3.33128	0	2.90839	3.2489	1.28442	2.61507	1.56757	-0.517814	-0.811708	0.569707	0.604588	0.999616
40922	mgU6-53B	-53B	0	3.82132	0	0.83282	0.783876	2.32671	1.08297	5.13769	1.74817	1.77695	0.517371	0.919343	1.89125	0.604897	0.999616
14662	cfa-miR-8814-3p	miR-8814-3p	16.8406	48.7218	8.13973	43.3067	35.2744	40.1357	24.9083	73.2121	36.3174	1.08369	0.517302	0.560594	1.47488	0.604945	0.999616
1993	mmu-miR-7063-5p	miR-7063-5p	11.5779	8.59797	1.62795	9.16102	14.1098	9.88851	14.0786	8.99096	9.75409	1.13636	0.51675	0.587212	1.50234	0.605331	0.999616
33645	piR-hsa-1692	piR-hsa-1692	3.15762	0.95533	0	0.83282	2.35163	4.65342	2.16594	0	1.76459	1.73385	0.51625	0.895098	1.85974	0.60568	0.999616
2161	mmu-mir-1191a	mir-1191a	1.05254	1.91066	0	0.83282	0.783876	2.90839	1.08297	2.56885	1.39251	1.7325	0.515371	0.892881	1.85688	0.606294	0.999616
7743	ppc-let-7-5p	let-7-5p	3.15762	0.95533	4.88384	0.83282	3.91938	1.16335	4.33187	6.42211	3.20829	1.39706	0.515217	0.719787	1.64694	0.606401	0.999616
4300	cme-MIR160a	MIR160a	0	9.5533	1.62795	3.33128	0.783876	4.65342	2.16594	17.9819	5.01221	1.51102	0.51519	0.778465	1.7153	0.60642	0.999616
2295	mmu-mir-5625	mir-5625	0	0.95533	3.25589	0.83282	3.1355	1.74503	1.08297	2.56885	1.69705	1.66458	0.514944	0.857168	1.81148	0.606592	0.999616
10221	hsa-miR-5094-3p	miR-5094-3p	10.5254	13.3746	4.88384	8.3282	13.3259	8.14348	9.74671	24.404	11.5915	1.10014	0.514534	0.566062	1.48048	0.606878	0.999616
747	cgr-mir-106b	mir-106b	4.21016	3.82132	0	4.99692	0	1.74503	2.16594	3.85327	2.59908	1.59099	-0.514526	-0.818607	0.566989	0.606885	0.999616
19456	hsa-miR-6745-3p	miR-6745-3p	4.21016	5.73198	6.51179	4.1641	3.91938	2.32671	3.2489	3.85327	4.24579	1.2223	-0.514118	-0.628408	0.64689	0.60717	0.999616
2714	xla-miR-24b-3p	miR-24b-3p	5.2627	3.82132	3.25589	5.82974	3.1355	1.74503	4.33187	2.56885	3.74386	1.26563	-0.512812	-0.649029	0.63771	0.608083	0.999616
2242	mmu-mir-342	mir-342	2.10508	0	16.2795	4.1641	7.05488	0	21.6594	10.2754	7.69228	1.58597	0.512598	0.812966	1.75682	0.608233	0.999616
1463	mmu-miR-3105-3p	miR-3105-3p	0	0.95533	0	2.49846	0	2.32671	5.41484	0	1.39942	2.11446	0.512502	1.08367	2.11942	0.608299	0.999616
26201	vvi-MIR169q	MIR169q	2.10508	6.68731	0	0	1.56775	1.74503	1.08297	0	1.64852	1.89778	-0.512405	-0.972433	0.509646	0.608367	0.999616
14949	chi-mir-542	mir-542	4.21016	5.73198	0	0	1.56775	1.16335	0	2.56885	1.90526	1.84179	-0.51159	-0.942242	0.520424	0.608938	0.999616
6807	mmu-miR-489-5p	miR-489-5p	1.05254	0	3.25589	4.99692	1.56775	2.90839	0	0	1.72269	1.87512	-0.511507	-0.959136	0.514365	0.608996	0.999616
30326	hsa-miR-127-3p	miR-127-3p	3.15762	3.82132	3.25589	3.33128	7.05488	2.90839	8.66375	2.56885	4.34525	1.25189	0.511275	0.64006	1.55839	0.609159	0.999616
4427	cte-mir-2712	mir-2712	6.31524	6.68731	3.25589	6.66256	3.91938	4.07174	3.2489	3.85327	4.75179	1.19859	-0.511168	-0.612682	0.65398	0.609233	0.999616
1743	mmu-miR-669k-5p	miR-669k-5p	85.2557	56.3645	94.4209	73.2882	68.1972	69.8013	0	57.799	63.1408	1.28715	-0.511151	-0.657928	0.633788	0.609245	0.999616
33554	piR-hsa-16527	piR-hsa-16527	7.36778	5.73198	13.0236	5.82974	7.05488	5.2351	0	7.70654	6.4937	1.29451	-0.511081	-0.661598	0.632178	0.609295	0.999616
6423	hsa-mir-922	mir-922	6.31524	7.64264	11.3956	2.49846	0	6.39845	4.33187	6.42211	5.62555	1.35232	-0.511065	-0.691124	0.619371	0.609306	0.999616
14776	cfa-mir-8863	mir-8863	3.15762	1.91066	0	0	3.91938	4.65342	1.08297	0	1.84051	1.84644	0.51103	0.943586	1.9233	0.60933	0.999616
427	bta-miR-381-3p	miR-381-3p	19866.7	14489.5	12006.1	15358.9	20601.8	0	0	10465.5	11598.6	1.93824	-0.510946	-0.990334	0.503361	0.609389	0.999616
18182	gma-MIR5031	MIR5031	2.10508	0	4.88384	0.83282	0	0	0	3.85327	1.45938	2.14774	-0.510757	-1.09697	0.467497	0.609521	0.999616
18762	hhi-miR-187-5p	miR-187-5p	10.5254	8.59797	9.76768	9.99384	7.83876	5.81677	7.58078	5.13769	8.15736	1.09274	-0.510714	-0.558076	0.679207	0.609551	0.999616
39994	piR-hsa-28140	piR-hsa-28140	5.2627	11.464	13.0236	5.82974	7.05488	2.32671	20.5764	24.404	11.2427	1.18744	0.510336	0.605994	1.52203	0.609816	0.999616
22144	oan-miR-1421d-5p	miR-1421d-5p	1.05254	1.91066	0	4.1641	5.48713	3.49006	1.08297	2.56885	2.46954	1.51931	0.510077	0.774968	1.71115	0.609997	0.999616
18949	hsa-miR-1976-5p	miR-1976-5p	5.2627	17.1959	13.0236	12.4923	18.0291	11.6335	1.08297	43.6704	15.2988	1.22948	0.509918	0.626934	1.54428	0.610109	0.999616
10061	gra-MIR8723b-3p	MIR8723b-3p	37.8914	21.9726	29.303	22.4861	11.7581	27.9205	23.8253	14.1286	23.6607	1.02099	-0.509492	-0.520186	0.697282	0.610407	0.999616
35518	piR-hsa-25191	piR-hsa-25191	1.05254	2.86599	1.62795	1.66564	1.56775	1.16335	1.08297	0	1.37827	1.7062	-0.509103	-0.868632	0.547666	0.61068	0.999616
2948	aca-miR-143-3p	miR-143-3p	32.6287	41.0792	24.4192	27.4831	0	0	41.1528	32.1106	24.8592	1.54565	-0.50894	-0.786646	0.57969	0.610794	0.999616
502	bta-mir-200c	mir-200c	1.05254	2.86599	4.88384	0	0	0	3.2489	1.28442	1.66696	1.94996	-0.508338	-0.991239	0.503045	0.611216	0.999616
20192	isc-mir-5306	mir-5306	1.05254	1.91066	0	0.83282	3.1355	1.74503	0	2.56885	1.40567	1.81072	0.507979	0.919806	1.89186	0.611468	0.999616
480	bta-miR-671-3p	miR-671-3p	312.604	330.544	537.222	226.527	275.14	275.715	320.559	0	284.789	1.36044	-0.507535	-0.690471	0.619652	0.611779	0.999616
2981	aca-mir-218-1	mir-218-1	4.21016	0	1.62795	0	0.783876	4.07174	4.33187	1.28442	2.03875	1.74299	0.507228	0.884096	1.84561	0.611995	0.999616
26615	bbe-miR-1-5p	miR-1-5p	3.15762	1.91066	0	2.49846	1.56775	0	0	2.56885	1.46292	1.9115	-0.506928	-0.968995	0.510862	0.612205	0.999616
20266	lja-MIR171b	MIR171b	0	1.91066	6.51179	0	1.56775	1.16335	6.49781	5.13769	2.84863	1.65201	0.506917	0.837434	1.78687	0.612213	0.999616
27741	mdo-miR-7345-1-5p	miR-7345-1-5p	19.9983	10.5086	1.62795	19.1549	13.3259	11.0519	7.58078	0	10.406	1.33545	-0.506873	-0.676904	0.625506	0.612244	0.999616
33975	piR-hsa-18336	piR-hsa-18336	0	0.95533	3.25589	0.83282	0	1.16335	5.41484	2.56885	1.77389	1.79765	0.506846	0.911133	1.88052	0.612263	0.999616
12194	asu-miR-100d-3p	miR-100d-3p	1.05254	0	0	4.99692	1.56775	1.74503	0	8.99096	2.29415	1.84035	0.506788	0.932668	1.9088	0.612304	0.999616
4868	eca-mir-9068	mir-9068	1.05254	39.1685	4.88384	19.9877	30.5711	19.1954	5.41484	47.5236	20.9747	1.27888	0.506445	0.647683	1.56665	0.612544	0.999616
34541	piR-hsa-20944	piR-hsa-20944	5.2627	10.5086	11.3956	3.33128	6.271	6.39845	3.2489	3.85327	6.28373	1.18038	-0.506331	-0.597663	0.660823	0.612624	0.999616
16950	efu-miR-9332-3p	miR-9332-3p	1.05254	5.73198	3.25589	4.1641	6.271	0.581677	0	1.28442	2.7927	1.55552	-0.506254	-0.787489	0.579352	0.612679	0.999616
4269	cin-miR-4171-5p	miR-4171-5p	3.15762	27.7046	4.88384	14.9908	8.62263	9.30684	7.58078	53.9457	16.2741	1.24111	0.50594	0.627927	1.54534	0.612899	0.999616
7325	oan-mir-32	mir-32	3.15762	3.82132	3.25589	3.33128	1.56775	2.32671	3.2489	1.28442	2.74924	1.35232	-0.505915	-0.684161	0.622368	0.612916	0.999616
8094	ptc-MIR6478	MIR6478	4.21016	0.95533	4.88384	5.82974	5.48713	5.81677	5.41484	7.70654	5.03804	1.23023	0.505794	0.622245	1.53927	0.613001	0.999616
25111	sma-mir-8421	mir-8421	1.05254	4.77665	0	3.33128	0.783876	1.74503	8.66375	5.13769	3.18635	1.50352	0.505205	0.759583	1.693	0.613415	0.999616
2032	mmu-miR-7116-3p	miR-7116-3p	3.15762	0.95533	0	0	4.70325	0	1.08297	2.56885	1.5585	1.96035	0.504856	0.989695	1.98576	0.61366	0.999616
24814	sbi-MIR437s	MIR437s	2.10508	2.86599	0	0	0.783876	0.581677	3.2489	5.13769	1.8404	1.76625	0.504829	0.891652	1.8553	0.613679	0.999616
33685	piR-hsa-17081	piR-hsa-17081	0	0.95533	4.88384	1.66564	2.35163	0	0	1.28442	1.39261	1.99323	-0.50461	-1.0058	0.497993	0.613833	0.999616
40072	piR-hsa-29492	piR-hsa-29492	4.21016	18.1513	0	9.16102	13.3259	8.72516	3.2489	25.6885	10.3139	1.3266	0.504336	0.669054	1.59003	0.614025	0.999616
40135	piR-hsa-30540	piR-hsa-30540	0	0.95533	3.25589	3.33128	1.56775	1.16335	1.08297	0	1.41957	1.8155	-0.504293	-0.915544	0.530144	0.614055	0.999616
12263	asu-mir-5354	mir-5354	21.0508	19.1066	39.0707	15.8236	15.6775	19.1954	19.4934	11.5598	20.1222	1.02765	-0.504268	-0.518211	0.698237	0.614073	0.999616
4485	dme-miR-92b-3p	miR-92b-3p	65.2575	58.2751	110.7	61.6287	51.7358	50.0242	62.8122	46.2392	63.3341	0.966121	-0.504238	-0.487154	0.713431	0.614094	0.999616
21689	mtr-MIR2655d	MIR2655d	4.21016	12.4193	1.62795	4.1641	1.56775	4.07174	1.08297	7.70654	4.60631	1.33223	-0.503898	-0.671311	0.627936	0.614333	0.999616
33768	piR-hsa-17393	piR-hsa-17393	1.05254	2.86599	3.25589	0	1.56775	1.16335	4.33187	5.13769	2.42189	1.55542	0.503709	0.783478	1.72128	0.614466	0.999616
11938	ame-miR-3786-3p	miR-3786-3p	0	3.82132	3.25589	0	0	0	2.16594	1.28442	1.31595	2.17492	-0.503671	-1.09544	0.467992	0.614493	0.999616
40706	U13		1.05254	5.73198	4.88384	0	3.91938	5.2351	3.2489	6.42211	3.81173	1.42626	0.503644	0.718328	1.64527	0.614512	0.999616
18626	hco-miR-5900-5p	miR-5900-5p	3.15762	2.86599	1.62795	0	1.56775	2.90839	1.08297	7.70654	2.61465	1.54517	0.503423	0.777874	1.7146	0.614667	0.999616
2026	mmu-miR-7091-3p	miR-7091-3p	0	2.86599	3.25589	0.83282	0.783876	0.581677	1.08297	1.28442	1.33596	1.78364	-0.503409	-0.897901	0.536667	0.614677	0.999616
4356	cre-MIR1173	MIR1173	0	2.86599	3.25589	0.83282	0.783876	0.581677	1.08297	1.28442	1.33596	1.78364	-0.503409	-0.897901	0.536667	0.614677	0.999616
12501	ath-MIR863	MIR863	4.21016	8.59797	0	1.66564	1.56775	1.16335	1.08297	5.13769	2.92819	1.51243	-0.503377	-0.76132	0.589956	0.614699	0.999616
392	bta-miR-323-5p	miR-323-5p	8.42032	13.3746	4.88384	4.99692	0	5.81677	12.9956	0	6.31101	1.50078	-0.503366	-0.755442	0.592365	0.614707	0.999616
40873	ACA8		3.15762	1.91066	0	1.66564	2.35163	4.65342	0	5.13769	2.35958	1.61653	0.503304	0.813608	1.7576	0.614751	0.999616
34220	piR-hsa-19425	piR-hsa-19425	0	1.91066	6.51179	1.66564	1.56775	2.32671	0	1.28442	1.90837	1.72017	-0.503289	-0.865743	0.548764	0.614761	0.999616
1119	hsa-miR-6087-3p	miR-6087-3p	30.5236	180.557	26.0471	194.88	151.288	120.989	47.6506	327.528	134.933	1.15522	0.503239	0.581354	1.49625	0.614796	0.999616
2842	hsa-mir-490	mir-490	4.21016	0	3.25589	0.83282	1.56775	2.32671	0	0	1.52417	1.91646	-0.503045	-0.964066	0.51261	0.614933	0.999616
37414	piR-hsa-4729	piR-hsa-4729	3.15762	3.82132	0	1.66564	2.35163	1.74503	3.2489	7.70654	2.96208	1.44891	0.502937	0.728709	1.65716	0.615009	0.999616
30611	hsa-mir-149	mir-149	1.05254	1.91066	0	0.83282	0.783876	2.32671	4.33187	0	1.40481	1.83465	0.502577	0.922051	1.89481	0.615262	0.999616
40913	U51		25.2609	27.7046	53.7222	21.6533	22.7324	18.032	18.4105	30.8261	27.2928	1.01349	-0.502573	-0.509351	0.702538	0.615264	0.999616
32305	piR-hsa-11949	piR-hsa-11949	0	0.95533	0	2.49846	2.35163	1.16335	0	3.85327	1.35275	1.95602	0.502416	0.982737	1.97621	0.615375	0.999616
2351	mmu-mir-712	mir-712	151.566	158.585	328.845	99.9384	93.2812	92.4867	140.786	195.232	157.59	0.998757	-0.502415	-0.50179	0.70623	0.615376	0.999616
39284	piR-hsa-18360	piR-hsa-18360	1.05254	1.91066	1.62795	2.49846	0.783876	1.74503	0	1.28442	1.36287	1.72305	-0.502401	-0.865662	0.548795	0.615385	0.999616
39094	piR-hsa-1621	piR-hsa-1621	5.2627	0	1.62795	0.83282	0	0.581677	1.08297	2.56885	1.49462	1.87323	-0.502133	-0.940611	0.521012	0.615574	0.999616
40787	HBII-180A	-180A	42.1016	56.3645	60.234	32.48	25.084	36.6457	24.9083	48.8081	40.8283	0.989877	-0.502067	-0.496985	0.708586	0.61562	0.999616
478	bta-miR-615-5p	miR-615-5p	2.10508	3.82132	1.62795	0.83282	4.70325	4.07174	2.16594	2.56885	2.73712	1.3927	0.501965	0.699088	1.62348	0.615692	0.999616
23069	pma-miR-4604-5p	miR-4604-5p	0	3.82132	1.62795	2.49846	1.56775	0.581677	1.08297	1.28442	1.55807	1.69554	-0.501748	-0.850735	0.554502	0.615845	0.999616
3812	bta-mir-181c	mir-181c	8.42032	2.86599	8.13973	6.66256	6.271	3.49006	6.49781	0	5.29343	1.31878	-0.501688	-0.661615	0.63217	0.615887	0.999616
31008	piR-hsa-28212	piR-hsa-28212	118.937	742.291	135.12	496.361	435.835	366.457	158.113	1257.45	463.82	1.13739	0.501644	0.570565	1.4851	0.615918	0.999616
633	cgr-let-7a	let-7a	0	3.82132	0	5.82974	3.91938	6.39845	5.41484	1.28442	3.33352	1.55234	0.50152	0.778532	1.71538	0.616005	0.999616
10417	mdm-MIR167g	MIR167g	1.05254	8.59797	0	0	0	0	17.3275	2.56885	3.69336	2.01318	0.501181	1.00897	2.01247	0.616244	0.999616
18397	gra-MIR8684	MIR8684	1.05254	3.82132	4.88384	0	0.783876	0	3.2489	1.28442	1.88436	1.78907	-0.500963	-0.896257	0.537279	0.616397	0.999616
139	aca-miR-30a-3p	miR-30a-3p	0	1360.39	1637.71	0	0	0	0	1217.63	526.967	2.59544	-0.500929	-1.30013	0.406089	0.616421	0.999616
876	eca-miR-431-5p	miR-431-5p	0	19771.5	0	0	28599.7	24372.9	0	0	9093.01	2.84018	0.50063	1.42188	2.67935	0.616631	0.999616
23835	ppy-mir-1285b	mir-1285b	2.10508	0.95533	1.62795	0	1.56775	1.74503	1.08297	3.85327	1.61717	1.68268	0.500519	0.842211	1.7928	0.61671	0.999616
24996	sko-mir-4828b	mir-4828b	1.05254	5.73198	1.62795	0.83282	2.35163	4.07174	7.58078	1.28442	3.06673	1.43277	0.500046	0.71645	1.64313	0.617043	0.999616
13134	bmo-miR-1000-3p	miR-1000-3p	3.15762	2.86599	4.88384	0.83282	0	4.07174	1.08297	1.28442	2.27242	1.58375	-0.499882	-0.791687	0.577668	0.617158	0.999616
15049	cin-miR-4127-5p	miR-4127-5p	2.10508	0.95533	3.25589	0.83282	0	5.81677	1.08297	5.13769	2.39832	1.60627	0.499601	0.802492	1.74411	0.617356	0.999616
5239	gga-miR-1708-3p	miR-1708-3p	1.05254	2.86599	1.62795	3.33128	2.35163	0.581677	2.16594	10.2754	3.03155	1.45489	0.499439	0.72663	1.65477	0.61747	0.999616
388	bta-miR-30e-5p	miR-30e-5p	57762.3	0	0	57460.4	57002.6	67920.1	52804.4	51054.5	43000.6	1.98138	0.499427	0.989553	1.98557	0.617478	0.999616
2542	rno-miR-191a-3p	miR-191a-3p	0	0	0	171.561	174.02	209.986	0	0	69.4459	2.32609	0.499264	1.16133	2.23664	0.617594	0.999616
13818	bta-miR-2452-5p	miR-2452-5p	3.15762	2.86599	4.88384	0.83282	2.35163	1.16335	2.16594	1.28442	2.3382	1.44518	-0.499215	-0.721456	0.606485	0.617628	0.999616
37050	piR-hsa-32129	piR-hsa-32129	4.21016	3.82132	11.3956	2.49846	5.48713	2.32671	2.16594	3.85327	4.46983	1.26631	-0.499176	-0.632112	0.645231	0.617656	0.999616
2669	ssc-miR-378b-3p	miR-378b-3p	56.8371	61.1411	0	0	79.9553	50.0242	0	88.6252	42.0729	1.77898	0.499118	0.88792	1.85051	0.617697	0.999616
23380	ppc-mir-2256	mir-2256	4.21016	3.82132	0	0	0.783876	2.90839	0	0	1.46547	2.07879	-0.498986	-1.03729	0.487242	0.617789	0.999616
16782	efu-miR-191-5p	miR-191-5p	0	59.2304	0	41.641	0	0	0	47.5236	18.5494	2.19991	-0.498927	-1.09759	0.467295	0.617831	0.999616
15222	cme-MIR530a	MIR530a	4.21016	0.95533	1.62795	0.83282	2.35163	5.2351	2.16594	2.56885	2.49347	1.44668	0.498806	0.721613	1.64902	0.617916	0.999616
37595	piR-hsa-5482	piR-hsa-5482	2.10508	0.95533	1.62795	1.66564	2.35163	2.32671	0	6.42211	2.18181	1.57621	0.498785	0.786188	1.72451	0.617931	0.999616
36206	piR-hsa-28494	piR-hsa-28494	3.15762	3.82132	3.25589	2.49846	1.56775	4.07174	11.9127	2.56885	4.10678	1.30978	0.498639	0.653109	1.57255	0.618034	0.999616
1166	lgi-miR-100-5p	miR-100-5p	10.5254	679.239	688.621	781.185	867.75	760.252	888.034	743.681	677.411	1.19155	0.498533	0.594026	1.50945	0.618108	0.999616
32299	piR-hsa-11932	piR-hsa-11932	1.05254	3.82132	0	3.33128	1.56775	0.581677	0	2.56885	1.61543	1.76758	-0.498482	-0.881105	0.542952	0.618145	0.999616
579	cfa-miR-138b-3p	miR-138b-3p	1.05254	2.86599	0	4.1641	3.91938	0	0	0	1.50025	2.07826	-0.498383	-1.03577	0.487756	0.618214	0.999616
16756	eca-mir-9183	mir-9183	7.36778	10.5086	1.62795	5.82974	6.271	3.49006	4.33187	2.56885	5.24948	1.23258	-0.498337	-0.614238	0.653275	0.618247	0.999616
24915	sja-miR-7-5p	miR-7-5p	0	3.82132	4.88384	3.33128	3.1355	2.32671	0	15.4131	4.11397	1.57745	0.497221	0.78434	1.7223	0.619033	0.999616
17820	ggo-mir-342	mir-342	0	0	3.25589	5.82974	3.91938	1.16335	3.2489	7.70654	3.14048	1.60251	0.496996	0.796442	1.73681	0.619192	0.999616
2729	xtr-miR-212-5p	miR-212-5p	93.676	89.801	83.0253	90.7774	85.4424	93.0684	1.08297	56.5146	74.1735	1.19904	-0.496919	-0.595824	0.661666	0.619246	0.999616
[truncated: 38,933 more rows]
